# Supplementary material
Source: publisher figshare collection journal article supplement (https://acs.figshare.com/ndownloader/files/4476172)

## SUPPORTING INFORMATION SECTION

### Intramolecular Hydrogen Bonding in Medicinal Chemistry

Bernd Kuhn, Peter Mohr and Martin Stahl

Discovery Chemistry, F. Hoffmann-La Roche AG, CH-4070 Basel, Switzerland

#### Table of Contents

|                                                                                         |        |
|-----------------------------------------------------------------------------------------|--------|
| Synthesis and Characterization Data for Model Compounds                                 | S2-48  |
| Methods for Measurement of Physicochemical Properties                                   | S49-50 |
| Summary of C=O...H-N interaction statistics (CSD)                                       | S51-52 |
| Summary of C=O...H-O interaction statistics (CSD)                                       | S53    |
| Summary of N...H-N and N...H-O interaction statistics (CSD)                             | S54    |
| Summary of Alkoxy...H-N interaction statistics (CSD)                                    | S55    |
| Comparison between CSD and PDB statistics of C=O...H-N and C=O...H-O interactions       | S56    |
| Crystal structure examples of N...H-N and Alkoxy...H-N interactions in 5-membered rings | S57    |

## S2-48: Synthesis and Characterisation Data for Model Compounds

All compounds were purified by chromatography and / or crystallization – if necessary - as indicated below individually to a purity of at least 95 % as determined by HPLC. Proton NMR's were obtained on a Bruker AVIII 600 CP instrument (600 MHz) with chemical shifts ( $\delta$  in ppm) reported relative to tetramethylsilane as an internal standard;  $^{13}\text{C}$  NMR were recorded at 150.9 MHz. Column chromatography was carried out on silica gel 60 (Chemie Brunschwig, 32-60 mesh, 60Å ). LC/MS analytics was done on an Agilent 1200 RRLLC with Agilent 6520 QTOF. Separation was achieved on a standard C18 column eclipse plus 2.1\*50 mm filled with 1.8  $\mu\text{m}$  particles. A gradient was applied from 5% water with 0.01 % formic acid to 99 % of a mixture containing 20% 2-propanol, 80 % acetonitrile and 0.01 % formic acid. To improve ionization, especially in negative mode, post column a splitting and dilution interface was built from two T-pieces and an additional isocratic pump with diluted ammonia in methanol. For simultaneous ESI and APCI ionization, a multimode source was used with standard parameters. For very high resolution MS a ThermoFinnigan LTQ-FTMS was used.

### 1a] 2-Ethyl-*N,N*-dimethyl-benzamide

2-Ethyl-benzoic acid (510 mg, 3.40 mmol) was dissolved in 8 ml of toluene and treated at 0°C with 575  $\mu\text{l}$  (6.79 mmol, 2 eq.) of oxalyl chloride and 1 drop of DMF. The mixture was kept for 2 h at ambient temperature. Careful evaporation left the acid chloride as pale yellow oil which was reacted with 3.4 ml of 2M dimethylamine (2 eq.) in THF; stirring was continued for 1 h. Pouring onto crashed ice, twofold extraction with ethyl acetate, washing with water, drying over  $\text{MgSO}_4$ , and evaporation gave 588 mg of the title compound as light yellow oil.

MS: C<sub>11</sub>H<sub>15</sub>NO, expected: 177.1154, found: 177.1151.

IR:

1a = 2-Ethyl-N,N-dimethyl-benzamide

17 Dec 2009

|              |                                                                                                                               |        |                       |                |                      |
|--------------|-------------------------------------------------------------------------------------------------------------------------------|--------|-----------------------|----------------|----------------------|
| Title        | *E090723.507 23718B094                                                                                                        | Origin | Hoffmann-La Roche Ltd | Owner          | Nicolet              |
| File Name    | C:\DOCUMENTS AND SETTINGS\MOHRP\LOCAL SETTINGS\TEMPORARY INTERNET FILES\CONTENT.IE5\OL55AZO5\2009000161428-E090723-507\11.JDX |        |                       |                |                      |
| Date Stamp   | 14:03:32                                                                                                                      | Date   | 17 Dec 2009 14:13:16  | Technique      | Infrared             |
| X Axis       | Wavenumber (cm-1)                                                                                                             | Y Axis | Transmittance         | Spectrum Range | 649.9041 - 3999.7058 |
| Data Spacing | 0.9642                                                                                                                        |        |                       | Points Count   | 3475                 |

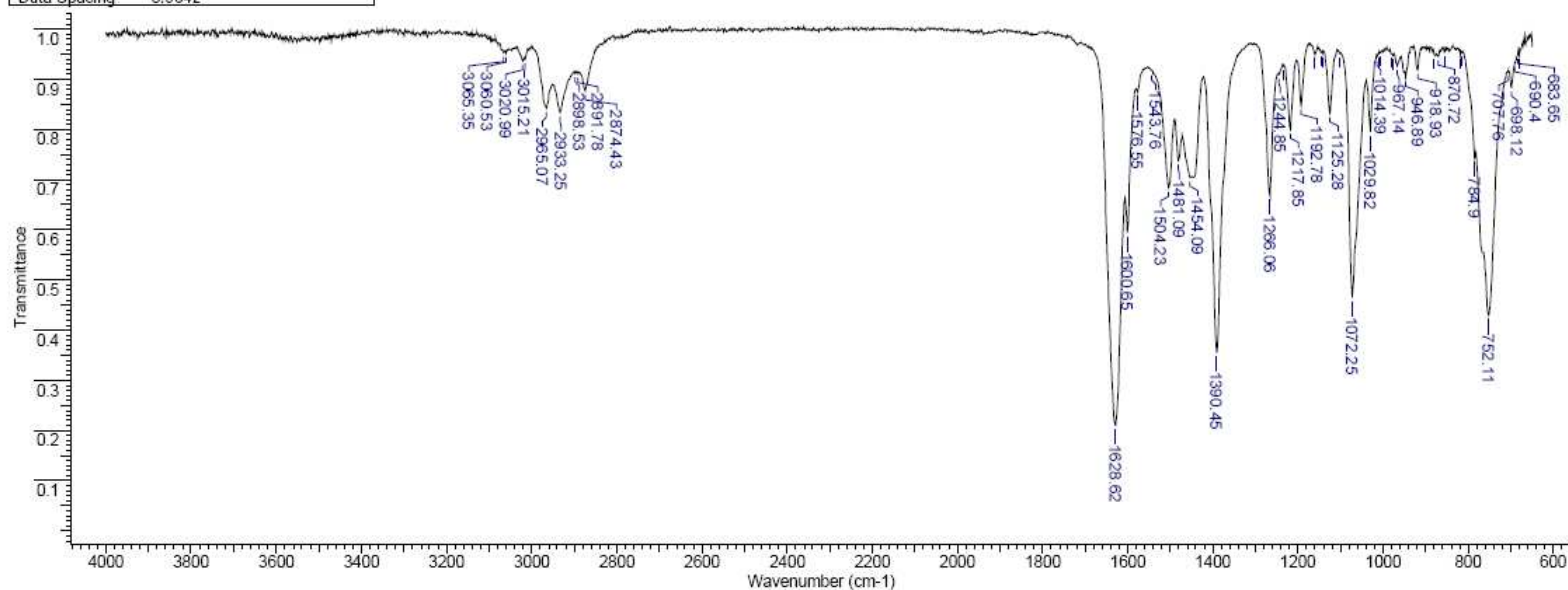

| No | cm-1   | T     | Intensity | No | cm-1    | T     | Intensity | No | cm-1    | T     | Intensity | No | cm-1    | T     | Intensity |
|----|--------|-------|-----------|----|---------|-------|-----------|----|---------|-------|-----------|----|---------|-------|-----------|
| 1  | 679.80 | 0.949 | VW        | 14 | 946.89  | 0.904 | W         | 27 | 1160.96 | 0.950 | VW        | 40 | 1628.62 | 0.211 | VS        |
| 2  | 683.65 | 0.949 | VW        | 15 | 967.14  | 0.926 | W         | 28 | 1192.78 | 0.848 | W         | 41 | 2874.43 | 0.876 | W         |
| 3  | 690.40 | 0.933 | VW        | 16 | 976.78  | 0.947 | VW        | 29 | 1217.85 | 0.800 | W         | 42 | 2891.78 | 0.912 | W         |
| 4  | 698.12 | 0.884 | W         | 17 | 981.61  | 0.951 | VW        | 30 | 1233.27 | 0.926 | W         | 43 | 2898.53 | 0.912 | W         |
| 5  | 707.76 | 0.914 | W         | 18 | 1006.88 | 0.952 | VW        | 31 | 1244.85 | 0.910 | W         | 44 | 2933.25 | 0.834 | W         |
| 6  | 752.11 | 0.430 | S         | 19 | 1010.53 | 0.950 | VW        | 32 | 1266.06 | 0.668 | M         | 45 | 2965.07 | 0.843 | W         |
| 7  | 784.90 | 0.743 | M         | 20 | 1014.39 | 0.945 | VW        | 33 | 1390.45 | 0.356 | S         | 46 | 3015.21 | 0.940 | VW        |
| 8  | 814.79 | 0.953 | VW        | 21 | 1029.82 | 0.795 | W         | 34 | 1454.09 | 0.704 | M         | 47 | 3020.99 | 0.936 | VW        |
| 9  | 818.65 | 0.948 | VW        | 22 | 1072.25 | 0.466 | S         | 35 | 1481.09 | 0.738 | M         | 48 | 3060.53 | 0.952 | VW        |
| 10 | 856.25 | 0.954 | VW        | 23 | 1101.17 | 0.951 | VW        | 36 | 1504.23 | 0.684 | M         | 49 | 3065.35 | 0.953 | VW        |
| 11 | 870.72 | 0.946 | VW        | 24 | 1125.28 | 0.833 | W         | 37 | 1543.76 | 0.916 | W         |    |         |       |           |
| 12 | 880.36 | 0.948 | VW        | 25 | 1142.64 | 0.952 | VW        | 38 | 1576.55 | 0.876 | W         |    |         |       |           |
| 13 | 918.93 | 0.919 | W         | 26 | 1145.53 | 0.954 | VW        | 39 | 1600.65 | 0.594 | M         |    |         |       |           |

# **<sup>1</sup>H-NMR:**

## **1a = 2-Ethyl-N,N-dimethyl-benzamide**

|                        |                                                                                                                                         |                        |                      |
|------------------------|-----------------------------------------------------------------------------------------------------------------------------------------|------------------------|----------------------|
| Acquisition Time (sec) | 9.9266                                                                                                                                  |                        |                      |
| Comment                | ARC= 2009000161428 Labjournal 23718B094 Labgroup ID mohrp Contact Person Name Stefan Buerli Contact Person Address 092/4.36A Theme 7299 |                        |                      |
| Date                   | 27 Jul 2009 22:33:41                                                                                                                    | Date Stamp             | 27 Jul 2009 22:33:41 |
| File Name              | C:\DOCUMENTS AND SETTINGS\MOHRP\LOCAL SETTINGS\TEMPORARY INTERNET FILES\CONTENT.IE5\RUC7ZL0X\2009000161428_2000[1].JDX                  |                        |                      |
| Frequency (MHz)        | 600.14                                                                                                                                  | Nucleus                | <sup>1</sup> H       |
| Origin                 | NMR Roche Basel                                                                                                                         | Original Points Count  | 131072               |
| Points Count           | 131072                                                                                                                                  | Solvent                | CHLOROFORM-d         |
| Sweep Width (Hz)       | 13204.13                                                                                                                                | Temperature (degree C) | 25.027               |
|                        |                                                                                                                                         | Number of Transients   | 8                    |
|                        |                                                                                                                                         | Owner                  | serv                 |
|                        |                                                                                                                                         | Spectrum Offset (Hz)   | 5691.3506            |

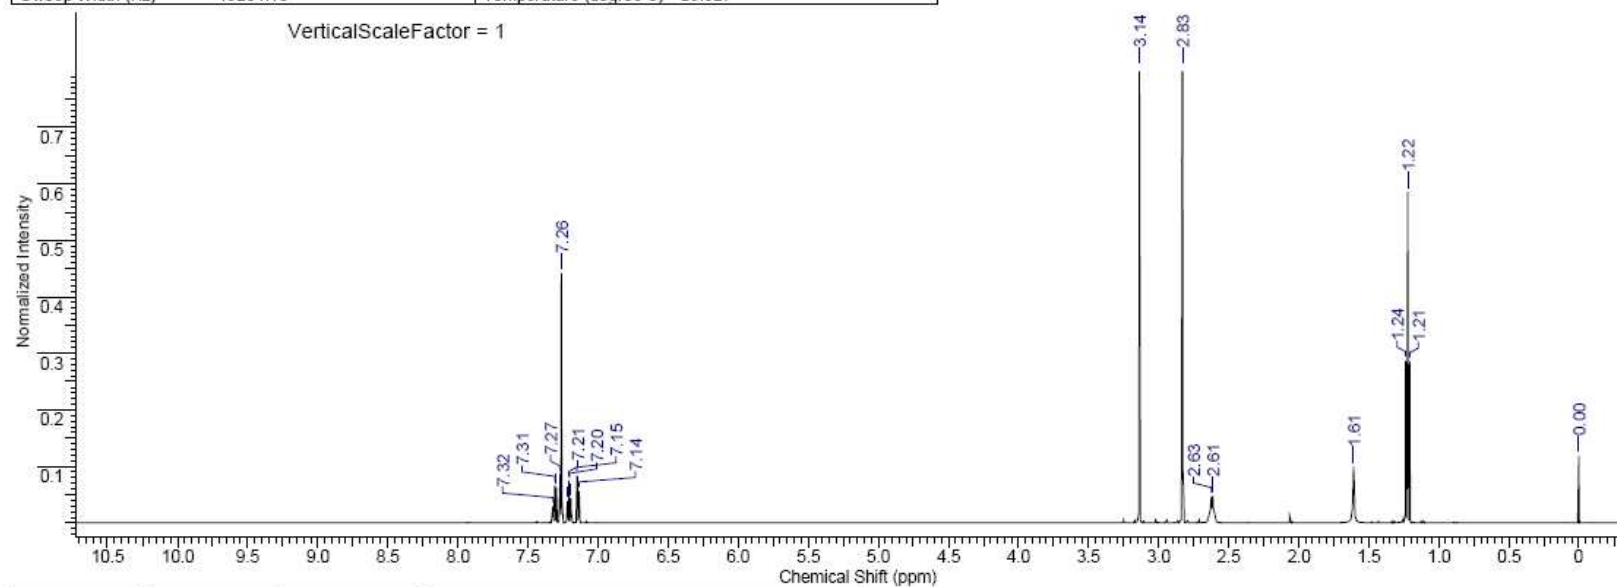

| (ppm) | (Hz)   | (ppm) | (Hz)   | (ppm) | (Hz)   | No | Color | Structure | Visible |
|-------|--------|-------|--------|-------|--------|----|-------|-----------|---------|
| 0.00  | 0.1    | 7.14  | 4283.1 | 7.26  | 4356.0 | 1  |       |           | True    |
| 1.21  | 726.0  | 7.15  | 4289.2 | 7.26  | 4358.8 |    |       |           |         |
| 1.22  | 733.6  | 7.15  | 4290.6 | 7.27  | 4362.9 |    |       |           |         |
| 1.24  | 741.2  | 7.19  | 4316.2 | 7.27  | 4363.6 |    |       |           |         |
| 1.61  | 965.7  | 7.19  | 4317.6 | 7.29  | 4377.7 |    |       |           |         |
| 2.61  | 1567.9 | 7.20  | 4323.7 | 7.30  | 4379.3 |    |       |           |         |
| 2.63  | 1575.5 | 7.21  | 4325.1 | 7.31  | 4385.2 |    |       |           |         |
| 2.83  | 1697.2 | 7.22  | 4331.0 | 7.31  | 4386.6 |    |       |           |         |
| 3.14  | 1882.6 | 7.22  | 4332.3 | 7.32  | 4392.8 |    |       |           |         |
| 7.13  | 4281.7 | 7.26  | 4355.3 | 7.32  | 4394.2 |    |       |           |         |

# 13C-NMR:

1a = 2-Ethyl-N,N-dimethyl-benzamide

|                        |                                                                                                                                         |                        |                      |                                 |
|------------------------|-----------------------------------------------------------------------------------------------------------------------------------------|------------------------|----------------------|---------------------------------|
| Acquisition Time (sec) | 3.6351                                                                                                                                  |                        |                      |                                 |
| Comment                | ARC= 2009000161424 Labjournal 23718B092 Labgroup ID mohrp Contact Person Name Stefan Buerli Contact Person Address 092/4.36A Theme 7299 |                        |                      |                                 |
| Date                   | 27 Jul 2009 22:27:32                                                                                                                    | Date Stamp             | 27 Jul 2009 22:27:32 |                                 |
| File Name              | C:\DOCUMENTS AND SETTINGS\MOHRP\LOCAL SETTINGS\TEMPORARY INTERNET FILES\CONTENT\IE51450Z4V4Z\2009000161424_2000[1].JDX                  |                        |                      |                                 |
| Frequency (MHz)        | 150.92                                                                                                                                  | Nucleus                | 13C                  | Number of Transients 512        |
| Origin                 | NMR Roche Basel                                                                                                                         | Original Points Count  | 131072               | Owner serv                      |
| Points Count           | 131072                                                                                                                                  | Solvent                | CHLOROFORM-d         | Spectrum Offset (Hz) 16603.5645 |
| Sweep Width (Hz)       | 36057.42                                                                                                                                | Temperature (degree C) | 25.027               |                                 |

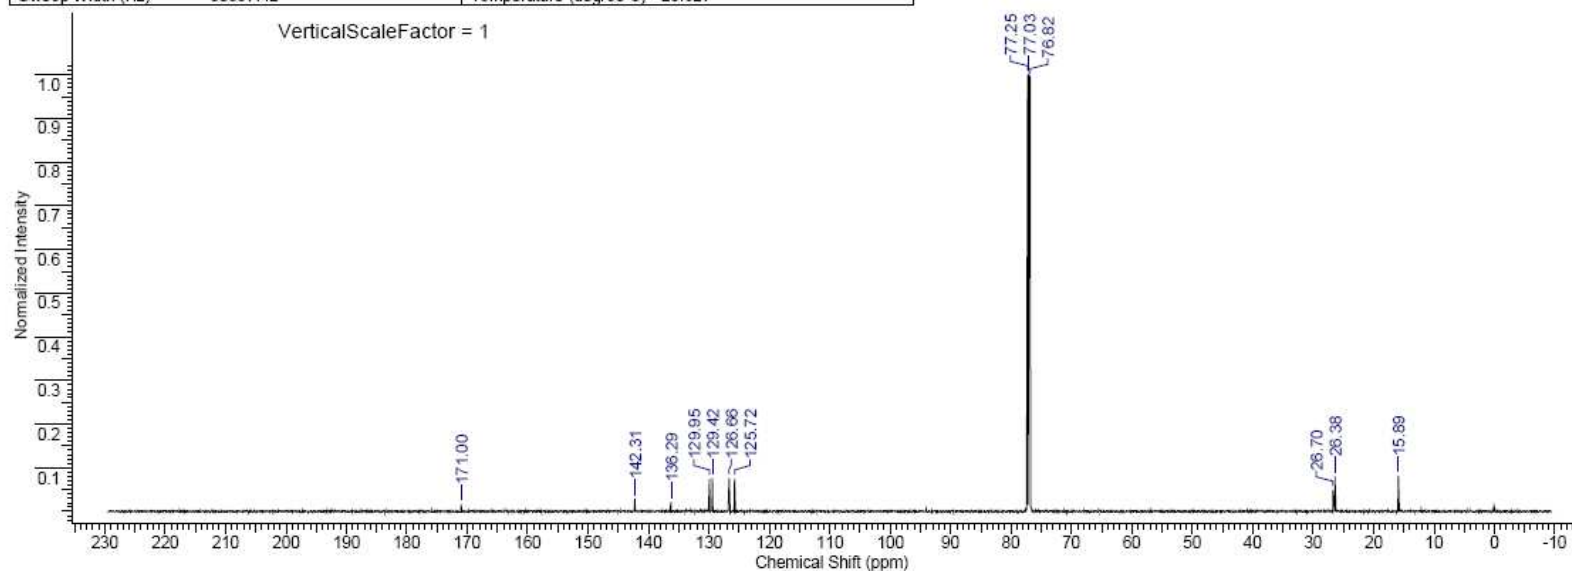

| (ppm)  | (Hz)    | (ppm)  | (Hz)    | No | Color | Structure | Visible |
|--------|---------|--------|---------|----|-------|-----------|---------|
| 15.89  | 2397.6  | 126.66 | 19114.8 | 1  |       |           | True    |
| 26.38  | 3981.4  | 129.42 | 19532.4 |    |       |           |         |
| 26.70  | 4029.2  | 129.95 | 19611.4 |    |       |           |         |
| 76.82  | 11594.2 | 136.29 | 20569.5 |    |       |           |         |
| 77.03  | 11626.1 | 142.31 | 21477.3 |    |       |           |         |
| 77.25  | 11658.3 | 171.00 | 25806.8 |    |       |           |         |
| 125.72 | 18973.9 |        |         |    |       |           |         |



# **<sup>1</sup>H-NMR:**

## **1b = 2-Methoxy-N,N-dimethyl-benzamide**

|                        |                                                                                                                                            |                        |                      |                                |
|------------------------|--------------------------------------------------------------------------------------------------------------------------------------------|------------------------|----------------------|--------------------------------|
| Acquisition Time (sec) | 9.9266                                                                                                                                     |                        |                      |                                |
| Comment                | ARC= 2009000161320 Labjournal UNIDENTIFIED Labgroup ID mohrp Contact Person Name Stefan Buerli Contact Person Address 092/4.36A Theme 7299 |                        |                      |                                |
| Date                   | 21 Jul 2009 18:40:06                                                                                                                       | Date Stamp             | 21 Jul 2009 18:40:06 |                                |
| File Name              | C:\DOCUMENTS AND SETTINGS\MOHRP\LOCAL SETTINGS\TEMPORARY INTERNET FILES\CONTENT\IE5\IM14NAXY5\2009000161320_1000f11.JDX                    |                        |                      |                                |
| Frequency (MHz)        | 600.14                                                                                                                                     | Nucleus                | <sup>1</sup> H       | Number of Transients 8         |
| Origin                 | NMR Roche Basel                                                                                                                            | Original Points Count  | 131072               | Owner serv                     |
| Points Count           | 131072                                                                                                                                     | Solvent                | CHLOROFORM-d         | Spectrum Offset (Hz) 5691.5127 |
| Sweep Width (Hz)       | 13204.13                                                                                                                                   | Temperature (degree C) | 25.027               |                                |

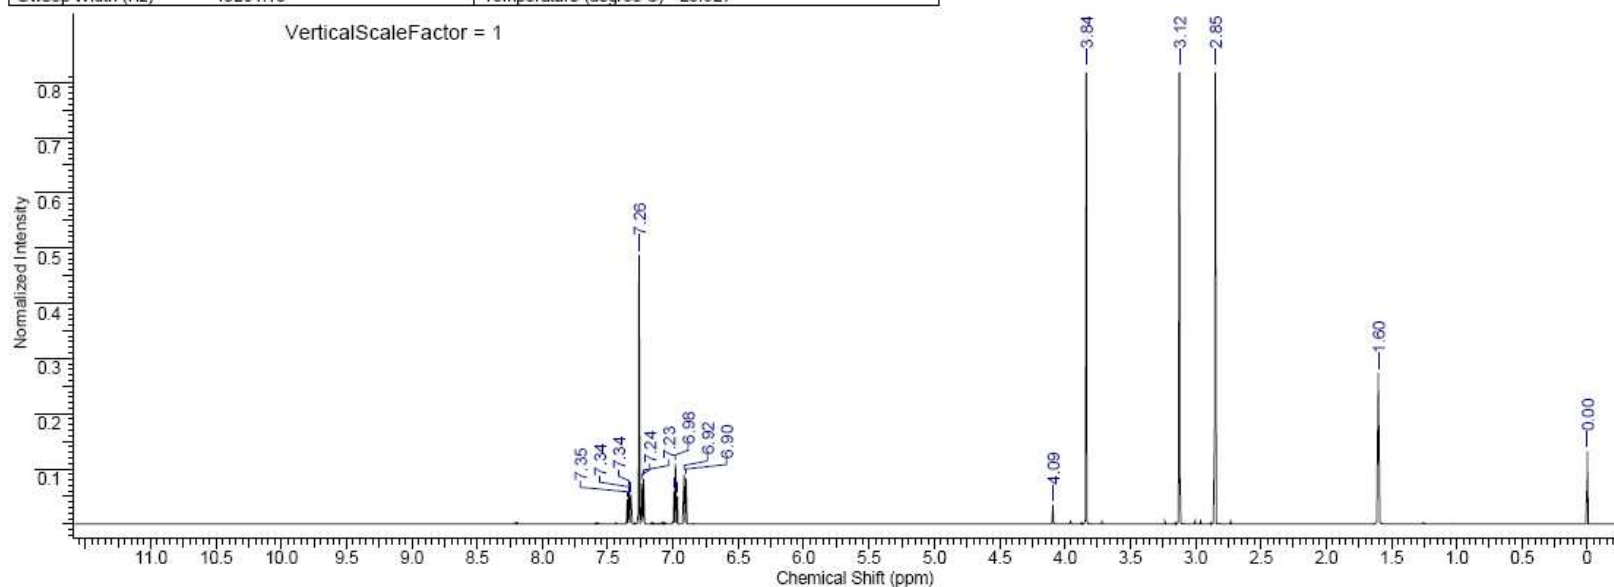

| (ppm) | (Hz)   | (ppm) | (Hz)   | (ppm) | (Hz)   |
|-------|--------|-------|--------|-------|--------|
| 0.00  | 0.1    | 6.97  | 4182.9 | 7.26  | 4358.8 |
| 1.60  | 960.4  | 6.98  | 4189.4 | 7.32  | 4394.8 |
| 2.85  | 1709.7 | 6.98  | 4190.3 | 7.33  | 4396.5 |
| 3.12  | 1873.0 | 6.99  | 4196.9 | 7.34  | 4402.3 |
| 3.84  | 2302.2 | 6.99  | 4197.8 | 7.34  | 4403.2 |
| 4.09  | 2454.6 | 7.23  | 4336.1 | 7.34  | 4404.0 |
| 6.90  | 4142.3 | 7.23  | 4337.8 | 7.34  | 4404.9 |
| 6.92  | 4150.6 | 7.24  | 4343.6 | 7.35  | 4410.7 |
| 6.97  | 4182.0 | 7.24  | 4345.3 | 7.35  | 4412.4 |

| No | Color | Structure | Visible |
|----|-------|-----------|---------|
| 1  |       |           | True    |



# **<sup>13</sup>C-NMR:**

## **1b = 2-Methoxy-N,N-dimethyl-benzamide**

|                        |                                                                                                                                            |                        |                      |                                 |
|------------------------|--------------------------------------------------------------------------------------------------------------------------------------------|------------------------|----------------------|---------------------------------|
| Acquisition Time (sec) | 3.6351                                                                                                                                     |                        |                      |                                 |
| Comment                | ARC= 2009000161320 Labjournal UNIDENTIFIED Labgroup ID mohrp Contact Person Name Stefan Buerli Contact Person Address 092/4.36A Theme 7299 |                        |                      |                                 |
| Date                   | 22 Jul 2009 12:18:31                                                                                                                       | Date Stamp             | 22 Jul 2009 12:18:31 |                                 |
| File Name              | C:\DOCUMENTS AND SETTINGS\MOHRP\LOCAL SETTINGS\TEMPORARY INTERNET FILES\CONTENT\IE5\YJU36DM3\2009000161320_2000[1].JDX                     |                        |                      |                                 |
| Frequency (MHz)        | 150.92                                                                                                                                     | Nucleus                | <sup>13</sup> C      | Number of Transients 128        |
| Origin                 | NMR Roche Basel                                                                                                                            | Original Points Count  | 131072               | Owner serv                      |
| Points Count           | 131072                                                                                                                                     | Solvent                | CHLOROFORM-d         | Spectrum Offset (Hz) 16603.6699 |
| Sweep Width (Hz)       | 36057.42                                                                                                                                   | Temperature (degree C) | 25.027               |                                 |

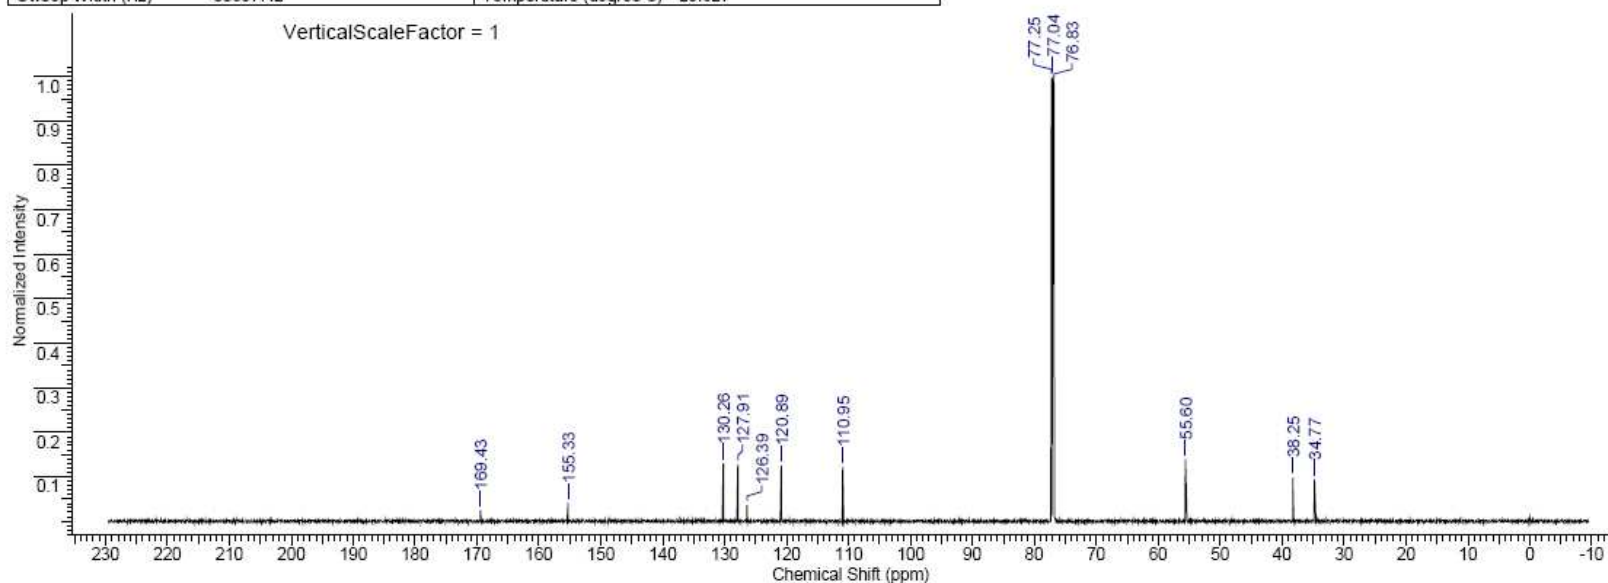

| (ppm)  | (Hz)    | (ppm)  | (Hz)    | No | Color | Structure | Visible |
|--------|---------|--------|---------|----|-------|-----------|---------|
| 34.77  | 5247.5  | 120.89 | 18245.0 | 1  |       |           | True    |
| 38.25  | 5772.9  | 126.39 | 19075.3 |    |       |           |         |
| 55.60  | 8390.5  | 127.91 | 19303.9 |    |       |           |         |
| 76.83  | 11594.8 | 130.26 | 19659.1 |    |       |           |         |
| 77.04  | 11626.7 | 155.33 | 23441.7 |    |       |           |         |
| 77.25  | 11658.6 | 169.43 | 25569.8 |    |       |           |         |
| 110.95 | 16744.4 |        |         |    |       |           |         |



**1c] 2-Ethyl-*N*-methyl-benzamide**

2-Ethyl-benzoic acid (510 mg, 3.40 mmol) was dissolved in 8 ml of toluene and treated at 0°C with 575 µl (6.79 mmol, 2 eq.) of oxalyl chloride and 1 drop of DMF. The mixture was kept for 2 h at ambient temperature. Careful evaporation left the acid chloride as pale yellow oil which was reacted with 3.4 ml of 2M methylamine (2 eq.) in THF; stirring was continued for 1 h. Pouring onto crashed ice, twofold extraction with ethyl acetate, washing with water, drying over MgSO<sub>4</sub>, and evaporation gave 538 mg of the title compound as off-white crystals.

MS: C<sub>10</sub>H<sub>13</sub>NO, expected: 163.0997, found: 163.0994.

IR:

1c = 2-Ethyl-N-methyl-benzamide

17 Dec 2009

|              |                                                                                                                               |        |                       |                |                      |
|--------------|-------------------------------------------------------------------------------------------------------------------------------|--------|-----------------------|----------------|----------------------|
| Title        | *E090723.506 23718B092                                                                                                        | Origin | Hoffmann-La Roche Ltd | Owner          | Nicolet              |
| File Name    | C:\DOCUMENTS AND SETTINGS\MOHRP\LOCAL SETTINGS\TEMPORARY INTERNET FILES\CONTENT\IE5\BAZDHLFF\2009000161424-E090723-506[1].JDX |        |                       |                |                      |
| Date Stamp   | 13:56:27                                                                                                                      | Date   | 17 Dec 2009 14:32:12  | Technique      | Infrared             |
| X Axis       | Wavenumber (cm-1)                                                                                                             | Y Axis | Transmittance         | Spectrum Range | 649.9041 - 3999.7058 |
| Data Spacing | 0.9642                                                                                                                        |        |                       | Points Count   | 3475                 |

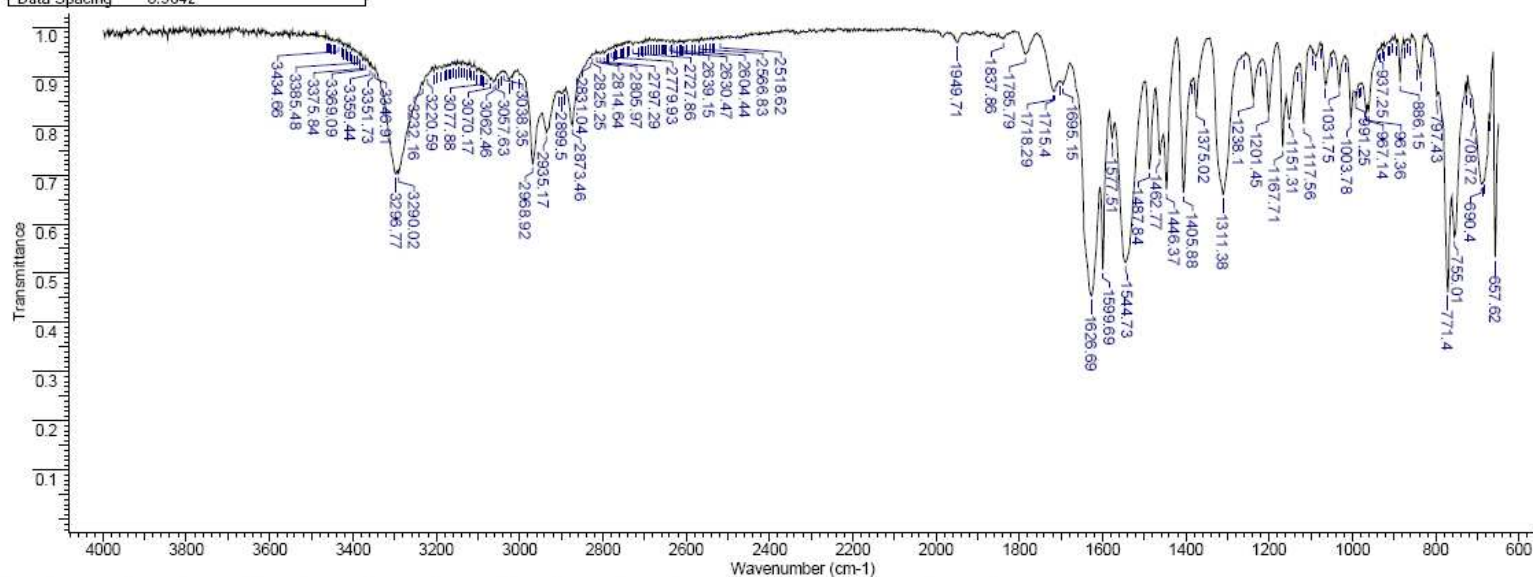

| No | cm-1   | T     | Intensity | No | cm-1    | T     | Intensity | No | cm-1    | T     | Intensity | No | cm-1    | T     | Intensity |
|----|--------|-------|-----------|----|---------|-------|-----------|----|---------|-------|-----------|----|---------|-------|-----------|
| 1  | 657.62 | 0.533 | S         | 27 | 961.36  | 0.828 | M         | 53 | 1462.77 | 0.741 | M         | 79 | 2613.12 | 0.971 | VW        |
| 2  | 670.15 | 0.816 | M         | 28 | 967.14  | 0.828 | M         | 54 | 1487.84 | 0.712 | M         | 80 | 2616.01 | 0.971 | VW        |
| 3  | 683.65 | 0.688 | M         | 29 | 978.71  | 0.885 | W         | 55 | 1544.73 | 0.523 | S         | 81 | 2620.83 | 0.968 | VW        |
| 4  | 687.51 | 0.684 | M         | 30 | 983.53  | 0.883 | W         | 56 | 1577.51 | 0.774 | M         | 82 | 2630.47 | 0.967 | VW        |
| 5  | 690.40 | 0.682 | M         | 31 | 991.25  | 0.854 | W         | 57 | 1599.69 | 0.508 | VS        | 83 | 2634.33 | 0.972 | VW        |
| 6  | 708.72 | 0.816 | M         | 32 | 1003.78 | 0.814 | M         | 58 | 1626.69 | 0.454 | VS        | 84 | 2639.15 | 0.969 | VW        |
| 7  | 717.40 | 0.865 | W         | 33 | 1015.35 | 0.936 | W         | 59 | 1695.15 | 0.884 | W         | 85 | 2648.79 | 0.971 | VW        |
| 8  | 726.08 | 0.870 | W         | 34 | 1031.75 | 0.878 | W         | 60 | 1701.90 | 0.890 | W         | 86 | 2652.65 | 0.973 | VW        |
| 9  | 755.01 | 0.573 | S         | 35 | 1049.10 | 0.947 | VW        | 61 | 1715.40 | 0.870 | W         | 87 | 2655.54 | 0.973 | VW        |
| 10 | 771.40 | 0.462 | VS        | 36 | 1064.53 | 0.882 | W         | 62 | 1718.29 | 0.870 | W         | 88 | 2659.40 | 0.972 | VW        |
| 11 | 797.43 | 0.860 | W         | 37 | 1075.14 | 0.963 | VW        | 63 | 1785.79 | 0.946 | W         | 89 | 2664.22 | 0.973 | VW        |
| 12 | 811.90 | 0.966 | VW        | 38 | 1087.67 | 0.940 | W         | 64 | 1837.86 | 0.977 | VW        | 90 | 2670.01 | 0.971 | VW        |
| 13 | 836.97 | 0.897 | W         | 39 | 1095.39 | 0.949 | VW        | 65 | 1949.71 | 0.969 | VW        | 91 | 2677.72 | 0.973 | VW        |
| 14 | 843.72 | 0.921 | W         | 40 | 1117.56 | 0.804 | M         | 66 | 2518.62 | 0.976 | VW        | 92 | 2684.47 | 0.973 | VW        |

# **<sup>1</sup>H-NMR:**

## **1c = 2-Ethyl-N-methyl-benzamide**

|                        |                                                                                                                                         |                        |                      |                      |           |
|------------------------|-----------------------------------------------------------------------------------------------------------------------------------------|------------------------|----------------------|----------------------|-----------|
| Acquisition Time (sec) | 9.9266                                                                                                                                  |                        |                      |                      |           |
| Comment                | ARC= 2009000161424 Labjournal 23718B092 Labgroup ID mohrp Contact Person Name Stefan Buerli Contact Person Address 092/4.36A Theme 7299 |                        |                      |                      |           |
| Date                   | 27 Jul 2009 22:29:31                                                                                                                    | Date Stamp             | 27 Jul 2009 22:29:31 |                      |           |
| File Name              | C:\DOCUMENTS AND SETTINGS\MOHRP\LOCAL SETTINGS\TEMPORARY INTERNET FILES\CONTENT\IE5\YJU36DM3\2009000161424_2001[1].JDX                  |                        |                      |                      |           |
| Frequency (MHz)        | 600.14                                                                                                                                  | Nucleus                | <sup>1</sup> H       | Number of Transients | 8         |
| Origin                 | NMR_Roche_Basel                                                                                                                         | Original Points Count  | 131072               | Owner                | serv      |
| Points Count           | 131072                                                                                                                                  | Solvent                | CHLOROFORM-d         | Spectrum Offset (Hz) | 5690.5947 |
| Sweep Width (Hz)       | 13204.13                                                                                                                                | Temperature (degree C) | 25.027               |                      |           |

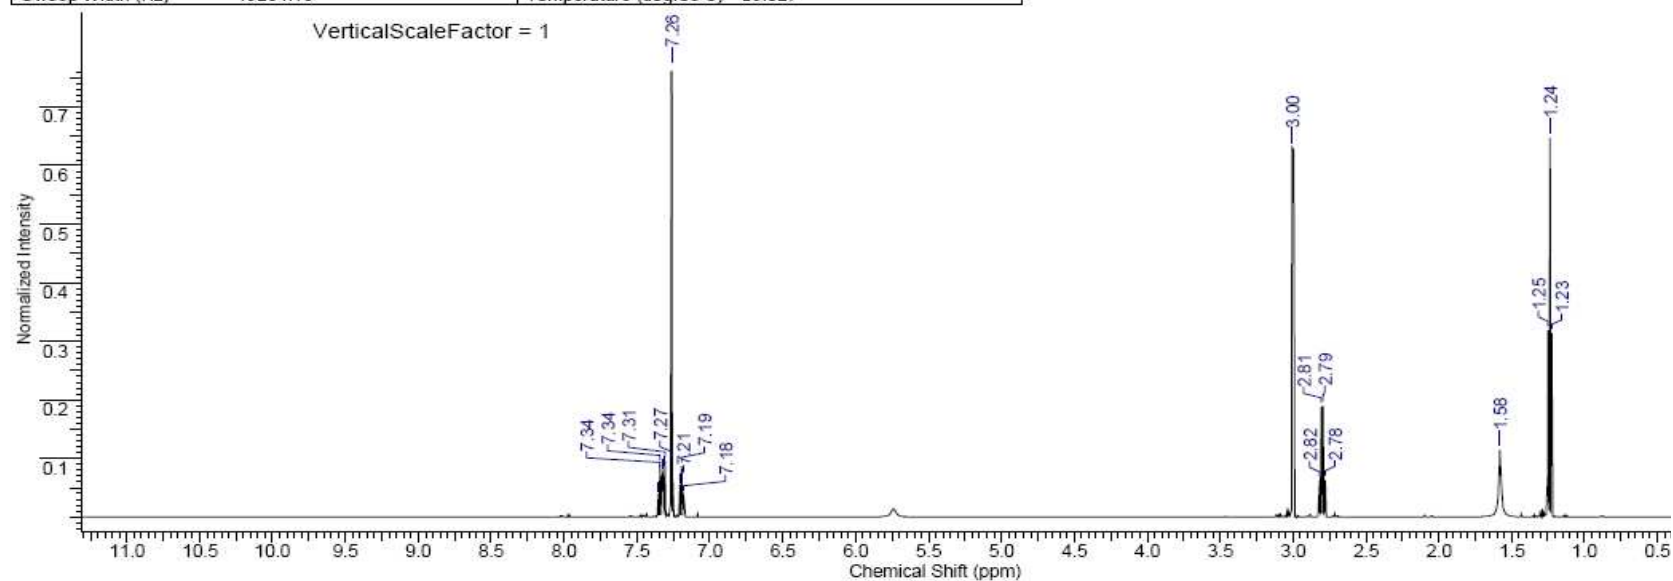

| (ppm) | (Hz)   | (ppm) | (Hz)   | (ppm) | (Hz)   | No | Color | Structure | Visible |
|-------|--------|-------|--------|-------|--------|----|-------|-----------|---------|
| 0.00  | 0.1    | 3.00  | 1803.3 | 7.31  | 4386.2 | 1  |       |           | True    |
| 1.23  | 735.3  | 7.18  | 4308.4 | 7.32  | 4392.4 |    |       |           |         |
| 1.24  | 742.9  | 7.18  | 4309.5 | 7.32  | 4393.7 |    |       |           |         |
| 1.25  | 750.4  | 7.19  | 4315.7 | 7.33  | 4398.0 |    |       |           |         |
| 1.26  | 756.8  | 7.19  | 4317.1 | 7.33  | 4399.5 |    |       |           |         |
| 1.58  | 948.3  | 7.20  | 4323.3 | 7.34  | 4405.5 |    |       |           |         |
| 2.78  | 1668.4 | 7.21  | 4324.4 | 7.34  | 4406.9 |    |       |           |         |
| 2.79  | 1675.9 | 7.25  | 4353.8 | 7.35  | 4413.1 |    |       |           |         |
| 2.81  | 1683.6 | 7.26  | 4358.2 | 7.36  | 4414.5 |    |       |           |         |
| 2.82  | 1691.2 | 7.27  | 4361.0 |       |        |    |       |           |         |
| 3.00  | 1798.3 | 7.31  | 4384.9 |       |        |    |       |           |         |

# **<sup>13</sup>C-NMR:**

1c = 2-Ethyl-N-methyl-benzamide

|                        |                                                                                                                                         |                        |                      |                      |            |
|------------------------|-----------------------------------------------------------------------------------------------------------------------------------------|------------------------|----------------------|----------------------|------------|
| Acquisition Time (sec) | 3.6351                                                                                                                                  |                        |                      |                      |            |
| Comment                | ARC= 2009000161424 Labjournal 23718B092 Labgroup ID mohrp Contact Person Name Stefan Buerli Contact Person Address 092/4.36A Theme 7299 |                        |                      |                      |            |
| Date                   | 27 Jul 2009 22:27:32                                                                                                                    | Date Stamp             | 27 Jul 2009 22:27:32 |                      |            |
| File Name              | C:\DOCUMENTS AND SETTINGS\MOHRP\LOCAL SETTINGS\TEMPORARY INTERNET FILES\CONTENT.IE5\M14NAXY5\2009000161424_2000[1].JDX                  |                        |                      |                      |            |
| Frequency (MHz)        | 150.92                                                                                                                                  | Nucleus                | <sup>13</sup> C      | Number of Transients | 512        |
| Origin                 | NMR Roche Basel                                                                                                                         | Original Points Count  | 131072               | Owner                | serv       |
| Points Count           | 131072                                                                                                                                  | Solvent                | CHLOROFORM-d         | Spectrum Offset (Hz) | 16603.5645 |
| Sweep Width (Hz)       | 36057.42                                                                                                                                | Temperature (degree C) | 25.027               |                      |            |

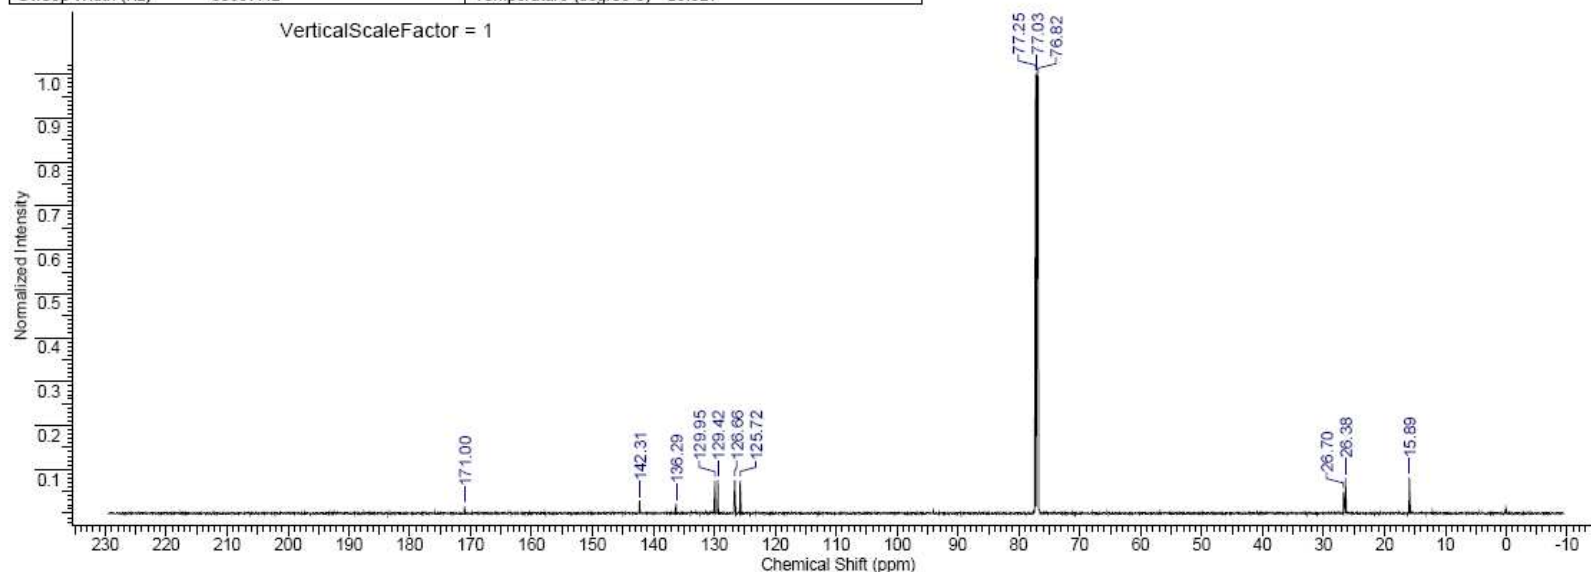

| (ppm)  | (Hz)    | (ppm)  | (Hz)    | No | Color | Structure | Visible |
|--------|---------|--------|---------|----|-------|-----------|---------|
| 15.89  | 2397.6  | 126.66 | 19114.8 | 1  |       |           | True    |
| 26.38  | 3981.4  | 129.42 | 19532.4 |    |       |           |         |
| 26.70  | 4029.2  | 129.95 | 19611.4 |    |       |           |         |
| 76.82  | 11594.2 | 136.29 | 20569.5 |    |       |           |         |
| 77.03  | 11626.1 | 142.31 | 21477.3 |    |       |           |         |
| 77.25  | 11658.3 | 171.00 | 25806.8 |    |       |           |         |
| 125.72 | 18973.9 |        |         |    |       |           |         |

# 1d] 2-Methoxy-N-methyl-benzamide

MS: C<sub>9</sub>H<sub>11</sub>NO<sub>2</sub>, expected: 165.079, found: 165.079.

IR:

1d = 2-Methoxy-N-methyl-benzamide

17 Dec 2009

|              |                                                                                                                               |        |                       |                |                      |
|--------------|-------------------------------------------------------------------------------------------------------------------------------|--------|-----------------------|----------------|----------------------|
| Title        | *E090722.506 4465-122F4                                                                                                       | Origin | Hoffmann-La Roche Ltd | Owner          | Nicolet              |
| File Name    | C:\DOCUMENTS AND SETTINGS\MOHRP\LOCAL SETTINGS\TEMPORARY INTERNET FILES\CONTENT.IE5\PDRT2U0E\2009000161342-E090722-506f11.JDX |        |                       |                |                      |
| Date Stamp   | 09:45:42                                                                                                                      | Date   | 17 Dec 2009 14:37:16  | Technique      | Infrared             |
| X Axis       | Wavenumber (cm-1)                                                                                                             | Y Axis | Transmittance         | Spectrum Range | 649.9041 - 3999.7058 |
| Data Spacing | 0.9642                                                                                                                        |        |                       | Points Count   | 3475                 |

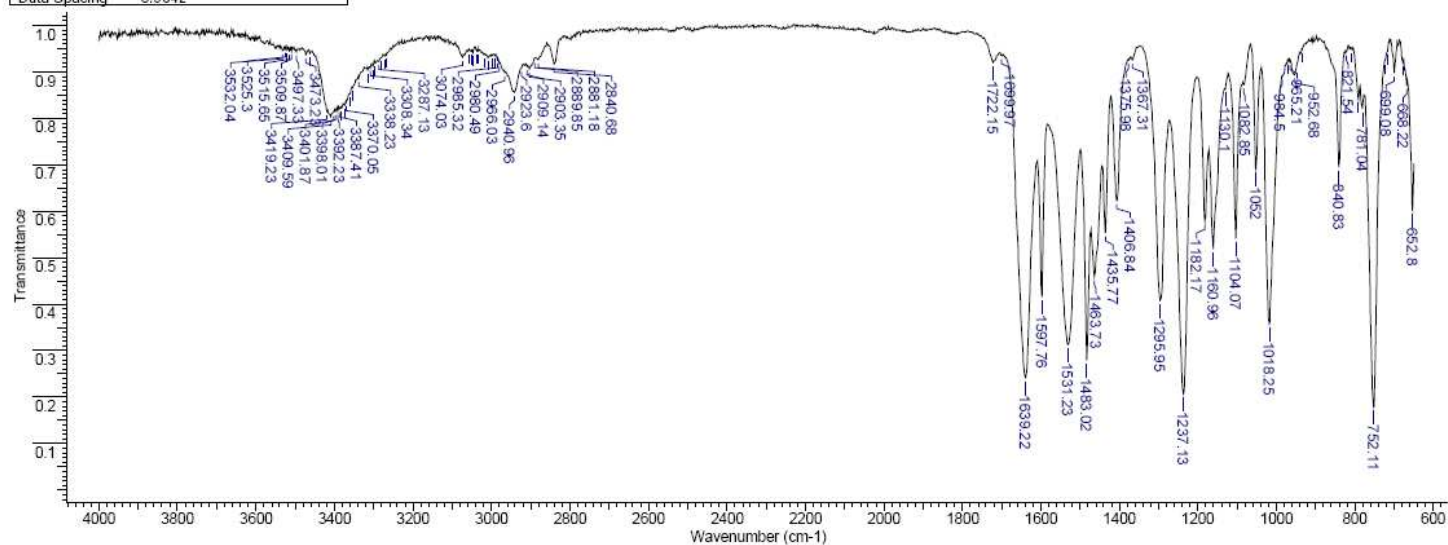

| No | cm-1   | T     | Intensity | No | cm-1    | T     | Intensity | No | cm-1    | T     | Intensity | No | cm-1    | T     | Intensity |
|----|--------|-------|-----------|----|---------|-------|-----------|----|---------|-------|-----------|----|---------|-------|-----------|
| 1  | 652.80 | 0.602 | M         | 23 | 1160.96 | 0.518 | M         | 45 | 2966.03 | 0.898 | W         | 67 | 3353.66 | 0.866 | W         |
| 2  | 668.22 | 0.871 | W         | 24 | 1182.17 | 0.579 | M         | 46 | 2980.49 | 0.919 | W         | 68 | 3361.37 | 0.852 | W         |
| 3  | 677.87 | 0.920 | W         | 25 | 1237.13 | 0.207 | VS        | 47 | 2985.32 | 0.927 | VW        | 69 | 3370.05 | 0.834 | W         |
| 4  | 699.08 | 0.897 | W         | 26 | 1295.95 | 0.408 | S         | 48 | 2991.10 | 0.935 | VW        | 70 | 3373.91 | 0.828 | W         |
| 5  | 716.44 | 0.944 | VW        | 27 | 1367.31 | 0.926 | VW        | 49 | 2997.85 | 0.935 | VW        | 71 | 3381.62 | 0.823 | W         |
| 6  | 722.22 | 0.924 | VW        | 28 | 1375.98 | 0.926 | VW        | 50 | 3008.46 | 0.930 | VW        | 72 | 3387.41 | 0.821 | W         |
| 7  | 752.11 | 0.178 | VS        | 29 | 1406.84 | 0.623 | M         | 51 | 3019.06 | 0.937 | VW        | 73 | 3392.23 | 0.816 | W         |
| 8  | 781.04 | 0.820 | W         | 30 | 1435.77 | 0.554 | M         | 52 | 3033.53 | 0.945 | VW        | 74 | 3398.01 | 0.815 | W         |
| 9  | 790.68 | 0.841 | W         | 31 | 1463.73 | 0.460 | S         | 53 | 3037.39 | 0.945 | VW        | 75 | 3401.87 | 0.813 | W         |
| 10 | 809.97 | 0.949 | VW        | 32 | 1483.02 | 0.279 | S         | 54 | 3047.99 | 0.941 | VW        | 76 | 3409.59 | 0.803 | W         |
| 11 | 821.54 | 0.943 | VW        | 33 | 1531.23 | 0.313 | S         | 55 | 3051.85 | 0.944 | VW        | 77 | 3419.23 | 0.815 | W         |
| 12 | 840.83 | 0.696 | M         | 34 | 1597.76 | 0.415 | S         | 56 | 3055.71 | 0.946 | VW        | 78 | 3462.62 | 0.940 | VW        |
| 13 | 934.36 | 0.947 | VW        | 35 | 1639.22 | 0.242 | VS        | 57 | 3074.03 | 0.931 | VW        | 79 | 3473.23 | 0.937 | VW        |

# 1H-NMR:

## 1d = 2-Methoxy-N-methyl-benzamide

|                        |                                                                                                                                          |                        |                      |                                |
|------------------------|------------------------------------------------------------------------------------------------------------------------------------------|------------------------|----------------------|--------------------------------|
| Acquisition Time (sec) | 9.9266                                                                                                                                   |                        |                      |                                |
| Comment                | ARC= 2009000161342 Labjournal 4465.122F4 Labgroup ID mohrp Contact Person Name Stefan Buerli Contact Person Address 092/4.36A Theme 7299 |                        |                      |                                |
| Date                   | 27 Jul 2009 21:45:34                                                                                                                     | Date Stamp             | 27 Jul 2009 21:45:34 |                                |
| File Name              | C:\DOCUMENTS AND SETTINGS\MOHRPI\LOCAL SETTINGS\TEMPORARY INTERNET FILES\CONTENT.IE5\OLS5\AZO5\2009000161342_2000[1].JDX                 |                        |                      |                                |
| Frequency (MHz)        | 600.14                                                                                                                                   | Nucleus                | 1H                   | Number of Transients 8         |
| Origin                 | NMR Roche Basel                                                                                                                          | Original Points Count  | 131072               | Owner serv                     |
| Points Count           | 131072                                                                                                                                   | Solvent                | CHLOROFORM-d         | Spectrum Offset (Hz) 5690.8535 |
| Sweep Width (Hz)       | 13204.13                                                                                                                                 | Temperature (degree C) | 25.027               |                                |

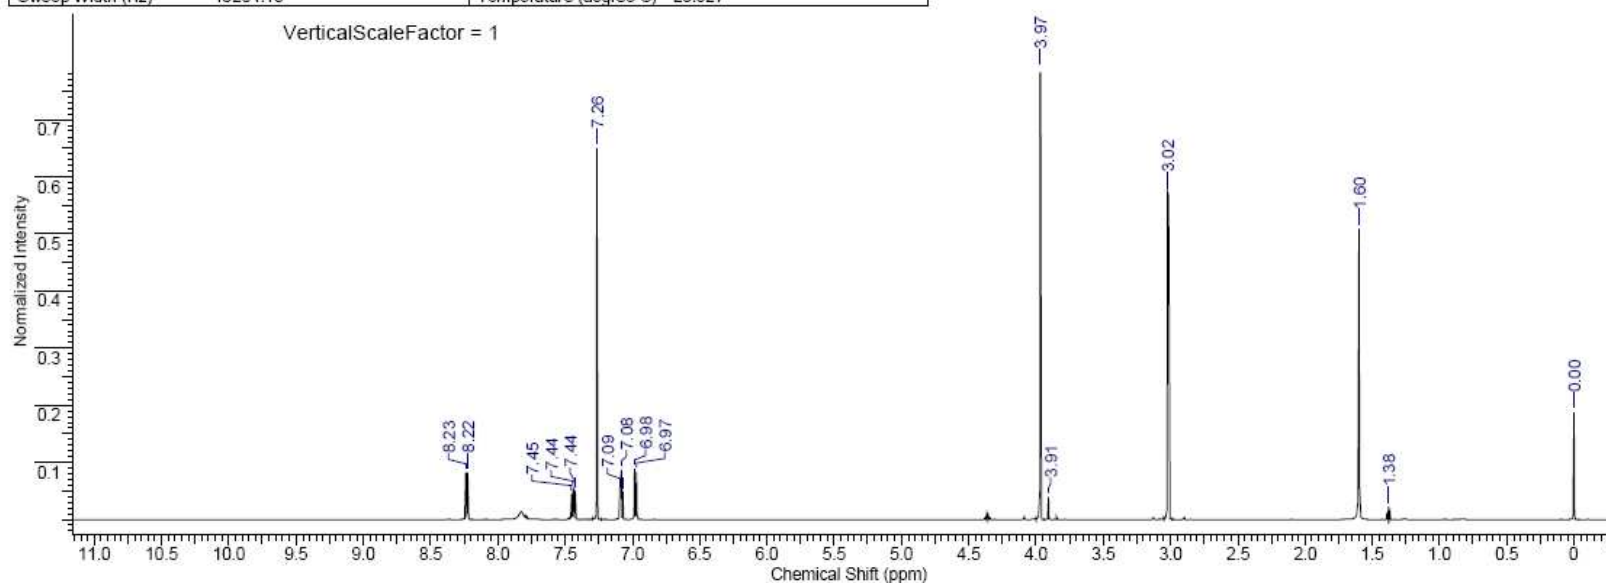

| (ppm) | (Hz)   | (ppm) | (Hz)   | (ppm) | (Hz)   | No | Color | Structure | Visible |
|-------|--------|-------|--------|-------|--------|----|-------|-----------|---------|
| 0.00  | 0.1    | 7.07  | 4243.1 | 7.44  | 4465.4 | 1  |       |           | True    |
| 1.38  | 828.0  | 7.08  | 4249.9 | 7.44  | 4466.4 |    |       |           |         |
| 1.60  | 960.2  | 7.08  | 4250.4 | 7.45  | 4471.8 |    |       |           |         |
| 3.01  | 1808.1 | 7.09  | 4257.2 | 7.45  | 4473.8 |    |       |           |         |
| 3.02  | 1812.9 | 7.10  | 4258.2 | 8.22  | 4933.4 |    |       |           |         |
| 3.91  | 2343.9 | 7.26  | 4358.5 | 8.22  | 4935.4 |    |       |           |         |
| 3.97  | 2381.5 | 7.43  | 4456.2 | 8.23  | 4941.2 |    |       |           |         |
| 6.97  | 4181.8 | 7.43  | 4458.1 | 8.24  | 4943.1 |    |       |           |         |
| 6.98  | 4190.1 | 7.44  | 4463.6 |       |        |    |       |           |         |
| 7.07  | 4242.1 | 7.44  | 4464.6 |       |        |    |       |           |         |



# **<sup>13</sup>C-NMR:**

## **1d = 2-Methoxy-N-methyl-benzamide**

|                        |                                                                                                                                          |                        |                      |                      |            |
|------------------------|------------------------------------------------------------------------------------------------------------------------------------------|------------------------|----------------------|----------------------|------------|
| Acquisition Time (sec) | 3.6351                                                                                                                                   |                        |                      |                      |            |
| Comment                | ARC= 2009000161342 Labjournal 4465.122F4 Labgroup ID mohrp Contact Person Name Stefan Buerli Contact Person Address 092/4.36A Theme 7299 |                        |                      |                      |            |
| Date                   | 27 Jul 2009 22:05:22                                                                                                                     | Date Stamp             | 27 Jul 2009 22:05:22 |                      |            |
| File Name              | C:\DOCUMENTS AND SETTINGS\MOHRP\LOCAL SETTINGS\TEMPORARY INTERNET FILES\CONTENT\IE5\IM14NAXY5\2009000161342_2001[1].JDX                  |                        |                      |                      |            |
| Frequency (MHz)        | 150.92                                                                                                                                   | Nucleus                | <sup>13</sup> C      | Number of Transients | 512        |
| Origin                 | NMR Roche Basel                                                                                                                          | Original Points Count  | 131072               | Owner                | serv       |
| Points Count           | 131072                                                                                                                                   | Solvent                | CHLOROFORM-d         | Spectrum Offset (Hz) | 16603.6582 |
| Sweep Width (Hz)       | 36057.42                                                                                                                                 | Temperature (degree C) | 25.027               |                      |            |
|                        |                                                                                                                                          |                        |                      |                      |            |

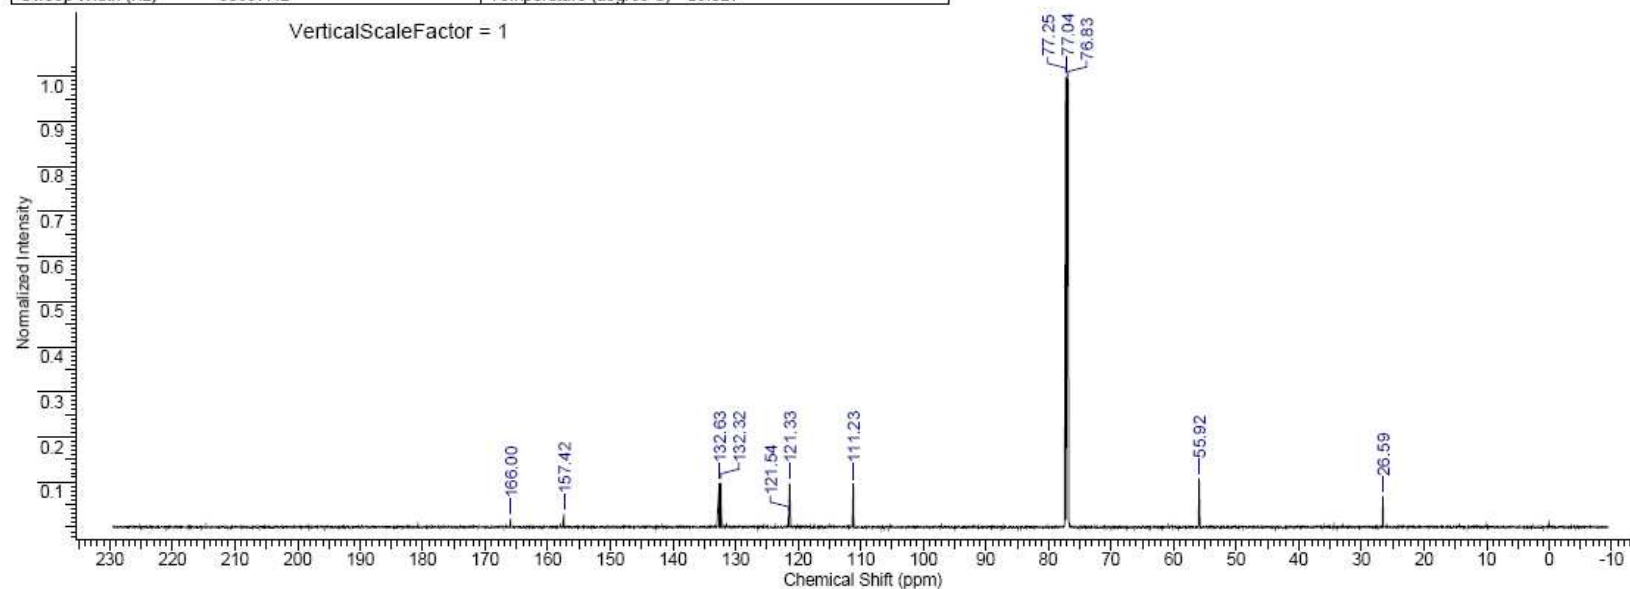

| (ppm)  | (Hz)    | (ppm)  | (Hz)    | No | Color | Structure | Visible |
|--------|---------|--------|---------|----|-------|-----------|---------|
| 26.59  | 4013.1  | 121.33 | 18311.1 | 1  |       |           | True    |
| 55.92  | 8439.2  | 121.54 | 18343.2 |    |       |           |         |
| 76.83  | 11594.5 | 132.32 | 19970.2 |    |       |           |         |
| 77.04  | 11626.4 | 132.63 | 20016.9 |    |       |           |         |
| 77.25  | 11658.4 | 157.42 | 23757.5 |    |       |           |         |
| 111.23 | 16787.0 | 166.00 | 25052.1 |    |       |           |         |



## **2a] 1,1-Dimethyl-3-phenyl-urea**

Aniline (175 mg, 1.88 mmol) was dissolved in 3.6 ml of  $\text{CH}_2\text{Cl}_2$  and treated at  $0^\circ\text{C}$  with 260  $\mu\text{l}$  (1.88 mmol, 1 eq.) of triethylamine and 207  $\mu\text{l}$  (1.2 eq.) of dimethylcarbamoyl chloride. The mixture was kept over night at ambient temperature. Pouring onto crashed ice, twofold extraction with ethyl acetate, washing with water, drying over  $\text{MgSO}_4$ , and evaporation of all solvents, followed by flash chromatography ( $\text{SiO}_2$ , heptane / ethyl acetate = 1 / 1) produced 152 mg of the title compound as white solid.

MS: C<sub>9</sub>H<sub>12</sub>N<sub>2</sub>O, expected: 164.095, found: 164.095.

IR:

# 2a = 1,1-Dimethyl-3-phenyl-urea

17 Dec 2009

|              |                                                                                                                               |        |                       |                |                      |
|--------------|-------------------------------------------------------------------------------------------------------------------------------|--------|-----------------------|----------------|----------------------|
| Title        | *E090924.106 24041B029                                                                                                        | Origin | Hoffmann-La Roche Ltd | Owner          | Nicolet              |
| File Name    | C:\DOCUMENTS AND SETTINGS\MOHRP\LOCAL SETTINGS\TEMPORARY INTERNET FILES\CONTENT\IE5\MT92FAHG\2009000164788-E090924-106[1].JDX |        |                       |                |                      |
| Date Stamp   | 09:04:05                                                                                                                      | Date   | 17 Dec 2009 14:44:30  | Technique      | Infrared             |
| X Axis       | Wavenumber (cm-1)                                                                                                             | Y Axis | Transmittance         | Spectrum Range | 519.7302 - 3999.7058 |
| Data Spacing | 0.9642                                                                                                                        |        |                       | Points Count   | 3610                 |

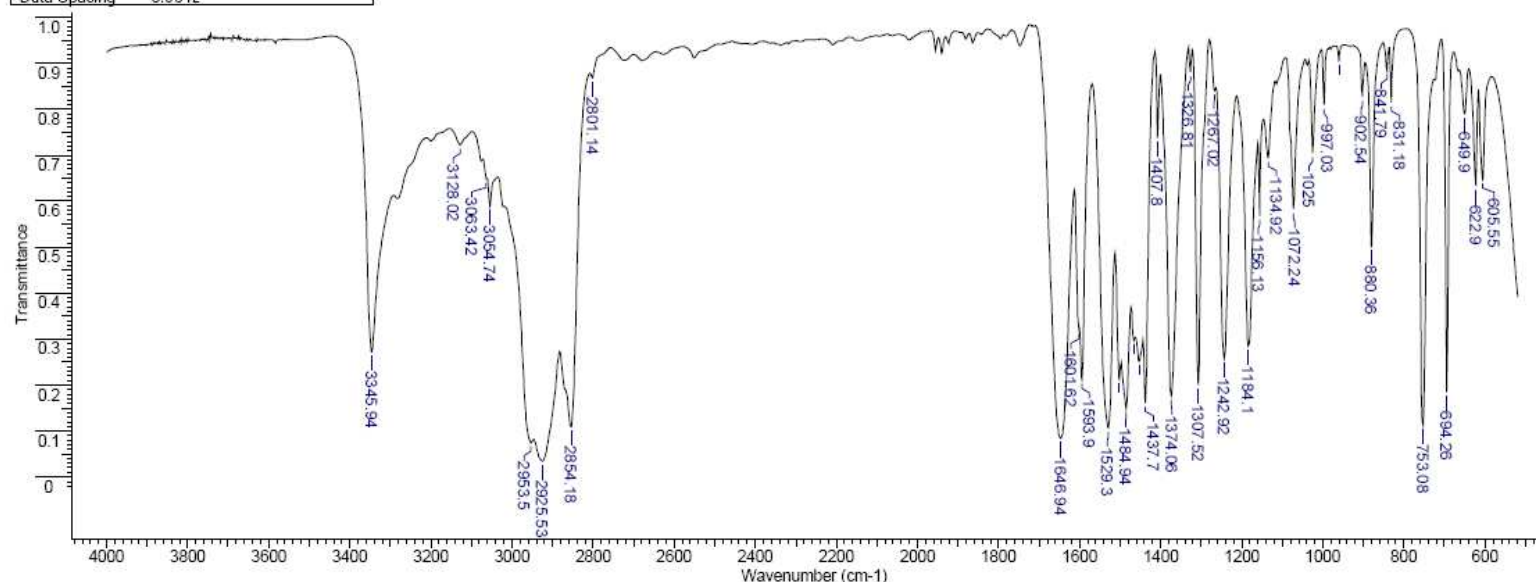

| No | cm-1   | T     | Intensity | No | cm-1    | T     | Intensity | No | cm-1    | T     | Intensity | No | cm-1    | T     | Intensity |
|----|--------|-------|-----------|----|---------|-------|-----------|----|---------|-------|-----------|----|---------|-------|-----------|
| 1  | 605.55 | 0.648 | M         | 11 | 997.03  | 0.810 | W         | 21 | 1374.06 | 0.176 | S         | 31 | 1646.94 | 0.085 | VS        |
| 2  | 622.90 | 0.633 | M         | 12 | 1025.00 | 0.706 | W         | 22 | 1407.80 | 0.737 | W         | 32 | 2801.14 | 0.868 | W         |
| 3  | 649.90 | 0.790 | W         | 13 | 1072.24 | 0.583 | M         | 23 | 1437.70 | 0.161 | S         | 33 | 2854.18 | 0.109 | VS        |
| 4  | 694.26 | 0.184 | S         | 14 | 1134.92 | 0.694 | M         | 24 | 1453.12 | 0.251 | S         | 34 | 2925.53 | 0.035 | VS        |
| 5  | 753.08 | 0.112 | VS        | 15 | 1156.13 | 0.568 | M         | 25 | 1466.62 | 0.297 | S         | 35 | 2953.50 | 0.074 | VS        |
| 6  | 831.18 | 0.815 | W         | 16 | 1184.10 | 0.284 | S         | 26 | 1484.94 | 0.149 | S         | 36 | 3054.74 | 0.589 | M         |
| 7  | 841.79 | 0.884 | W         | 17 | 1242.92 | 0.257 | S         | 27 | 1502.30 | 0.212 | S         | 37 | 3063.42 | 0.649 | M         |
| 8  | 880.36 | 0.501 | M         | 18 | 1267.02 | 0.841 | W         | 28 | 1529.30 | 0.107 | VS        | 38 | 3128.02 | 0.723 | W         |
| 9  | 902.54 | 0.828 | W         | 19 | 1307.52 | 0.200 | S         | 29 | 1593.90 | 0.211 | S         | 39 | 3345.94 | 0.272 | S         |
| 10 | 960.39 | 0.904 | VW        | 20 | 1326.81 | 0.880 | W         | 30 | 1601.62 | 0.319 | S         |    |         |       |           |

# 1H-NMR:

2a = 1,1-Dimethyl-3-phenyl-urea

|                        |                                                                                                                                         |                        |                      |                      |           |
|------------------------|-----------------------------------------------------------------------------------------------------------------------------------------|------------------------|----------------------|----------------------|-----------|
| Acquisition Time (sec) | 9.9266                                                                                                                                  |                        |                      |                      |           |
| Comment                | ARC= 2009000164788 Labjournal 24041B029 Labgroup ID mohrp Contact Person Name Stefan Buerli Contact Person Address 092/4.36A Theme 4652 |                        |                      |                      |           |
| Date                   | 23 Sep 2009 12:29:47                                                                                                                    | Date Stamp             | 23 Sep 2009 12:29:47 |                      |           |
| File Name              | C:\DOCUMENTS AND SETTINGS\MOHRP\LOCAL SETTINGS\TEMPORARY INTERNET FILES\CONTENT.IE5\450Z4V4Z\2009000164788_1000[1].JDX                  |                        |                      |                      |           |
| Frequency (MHz)        | 600.14                                                                                                                                  | Nucleus                | 1H                   | Number of Transients | 8         |
| Origin                 | NMR Roche Basel                                                                                                                         | Original Points Count  | 131072               | Owner                | serv      |
| Points Count           | 131072                                                                                                                                  | Solvent                | CHLOROFORM-d         | Spectrum Offset (Hz) | 5690.3428 |
| Sweep Width (Hz)       | 13204.13                                                                                                                                | Temperature (degree C) | 25.027               |                      |           |

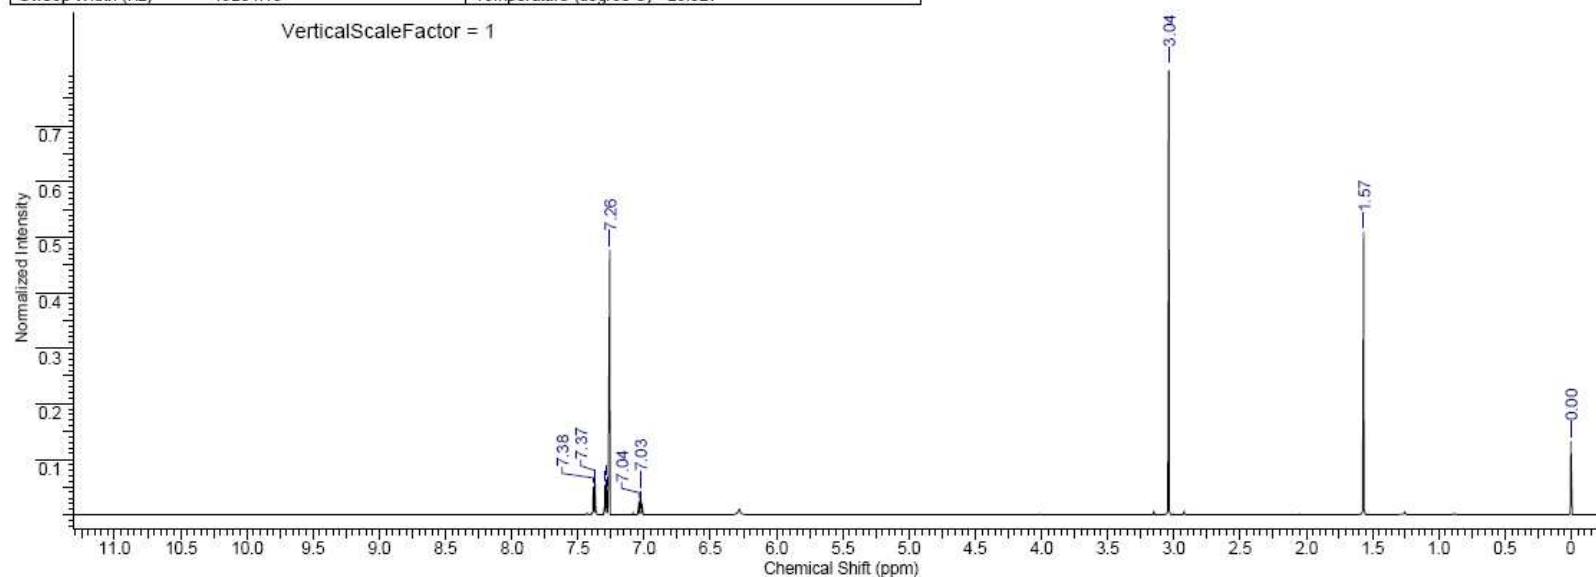

| (ppm) | (Hz)   | (ppm) | (Hz)   |
|-------|--------|-------|--------|
| 0.00  | 0.1    | 7.28  | 4370.6 |
| 1.57  | 941.0  | 7.28  | 4371.7 |
| 3.04  | 1823.1 | 7.30  | 4379.1 |
| 7.03  | 4217.4 | 7.37  | 4422.4 |
| 7.04  | 4224.8 | 7.37  | 4423.5 |
| 7.26  | 4357.7 | 7.38  | 4430.9 |
| 7.27  | 4363.1 | 7.39  | 4432.1 |

| No | Color | Structure | Visible |
|----|-------|-----------|---------|
| 1  |       |           | True    |

# 13-C NMR:

2a = 1,1-Dimethyl-3-phenyl-urea

|                        |                                                                                                                                         |                        |                      |                                 |
|------------------------|-----------------------------------------------------------------------------------------------------------------------------------------|------------------------|----------------------|---------------------------------|
| Acquisition Time (sec) | 3.6351                                                                                                                                  |                        |                      |                                 |
| Comment                | ARC= 2009000164788 Labjournal 24041B029 Labgroup ID mohrp Contact Person Name Stefan Buerli Contact Person Address 092/4.36A Theme 4652 |                        |                      |                                 |
| Date                   | 23 Sep 2009 12:43:45                                                                                                                    | Date Stamp             | 23 Sep 2009 12:43:45 |                                 |
| File Name              | C:\DOCUMENTS AND SETTINGS\MOHRP\LOCAL SETTINGS\TEMPORARY INTERNET FILES\CONTENT.IE5\RUC7ZL0X\2009000164788_1002[1].JDX                  |                        |                      |                                 |
| Frequency (MHz)        | 150.92                                                                                                                                  | Nucleus                | 13C                  | Number of Transients 256        |
| Origin                 | NMR Roche Basel                                                                                                                         | Original Points Count  | 131072               | Owner serv                      |
| Points Count           | 131072                                                                                                                                  | Solvent                | CHLOROFORM-d         | Spectrum Offset (Hz) 16603.6113 |
| Sweep Width (Hz)       | 36057.42                                                                                                                                | Temperature (degree C) | 25.027               |                                 |

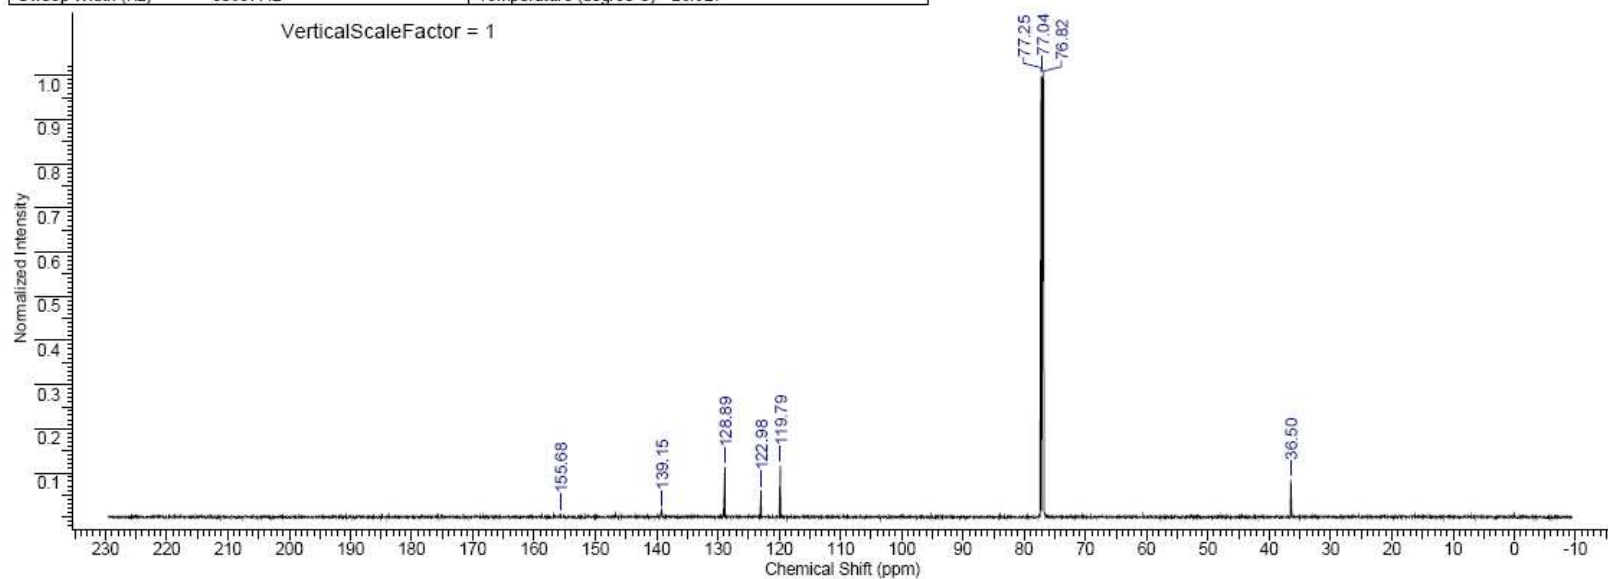

| (ppm)  | (Hz)    | No | Color | Structure | Visible |
|--------|---------|----|-------|-----------|---------|
| 36.50  | 5507.9  | 1  |       |           | True    |
| 76.82  | 11594.2 |    |       |           |         |
| 77.04  | 11626.1 |    |       |           |         |
| 77.25  | 11658.0 |    |       |           |         |
| 119.79 | 18078.0 |    |       |           |         |
| 122.98 | 18559.4 |    |       |           |         |
| 128.89 | 19451.6 |    |       |           |         |
| 139.15 | 21000.4 |    |       |           |         |
| 155.68 | 23494.4 |    |       |           |         |

## **2b] 1,1-Dimethyl-3-pyridin-2-yl-urea**

Pyridin-2-ylamine (222 mg, 2.36 mmol) was dissolved in 2.5 ml of  $\text{CH}_2\text{Cl}_2$  and treated at  $0^\circ\text{C}$  with 401  $\mu\text{l}$  (2.36 mmol, 1 eq.) of ethyl-diisopropyl-amine and 325  $\mu\text{l}$  (1.5 eq.) of dimethylcarbamoyl chloride. The mixture was kept over night at ambient temperature. Pouring onto crashed ice, twofold extraction with ethyl acetate, washing with water, drying over  $\text{MgSO}_4$ , and evaporation of all solvents, followed by threefold flash chromatography ( $\text{SiO}_2$ ,  $\text{CH}_2\text{Cl}_2$  /  $\text{MeOH}$  = 97 / 3, then  $\text{SiO}_2$ , ethyl acetate / heptane = 75 / 25, then  $\text{SiO}_2$ ,  $\text{CH}_2\text{Cl}_2$  /  $\text{MeOH}$  = 95 / 5), yielded 31 mg of the title compound as light yellow viscous oil.

MS: C<sub>8</sub>H<sub>11</sub>N<sub>3</sub>O, expected (M+H<sup>+</sup>): 166.09749, found: 166.09746 (M+H<sup>+</sup>).

IR:

2b = 1,1-Dimethyl-3-pyridin-2-yl-urea

17 Dec 2009

|              |                                                                                                                              |        |                       |                |                      |
|--------------|------------------------------------------------------------------------------------------------------------------------------|--------|-----------------------|----------------|----------------------|
| Title        | *E090903.501 24-041B015                                                                                                      | Origin | Hoffmann-La Roche Ltd | Owner          | Nicolet              |
| File Name    | C:\DOCUMENTS AND SETTINGS\MOHRP\LOCAL SETTINGS\TEMPORARY INTERNET FILES\CONTENT\IE5\YJU36DM3\2009000163658-E090903-501\1\JDX |        |                       |                |                      |
| Date Stamp   | 07:55:41                                                                                                                     | Date   | 17 Dec 2009 14:47:18  | Technique      | Infrared             |
| X Axis       | Wavenumber (cm-1)                                                                                                            | Y Axis | Transmittance         | Spectrum Range | 649.9041 - 3999.7058 |
| Data Spacing | 0.9642                                                                                                                       |        |                       | Points Count   | 3475                 |

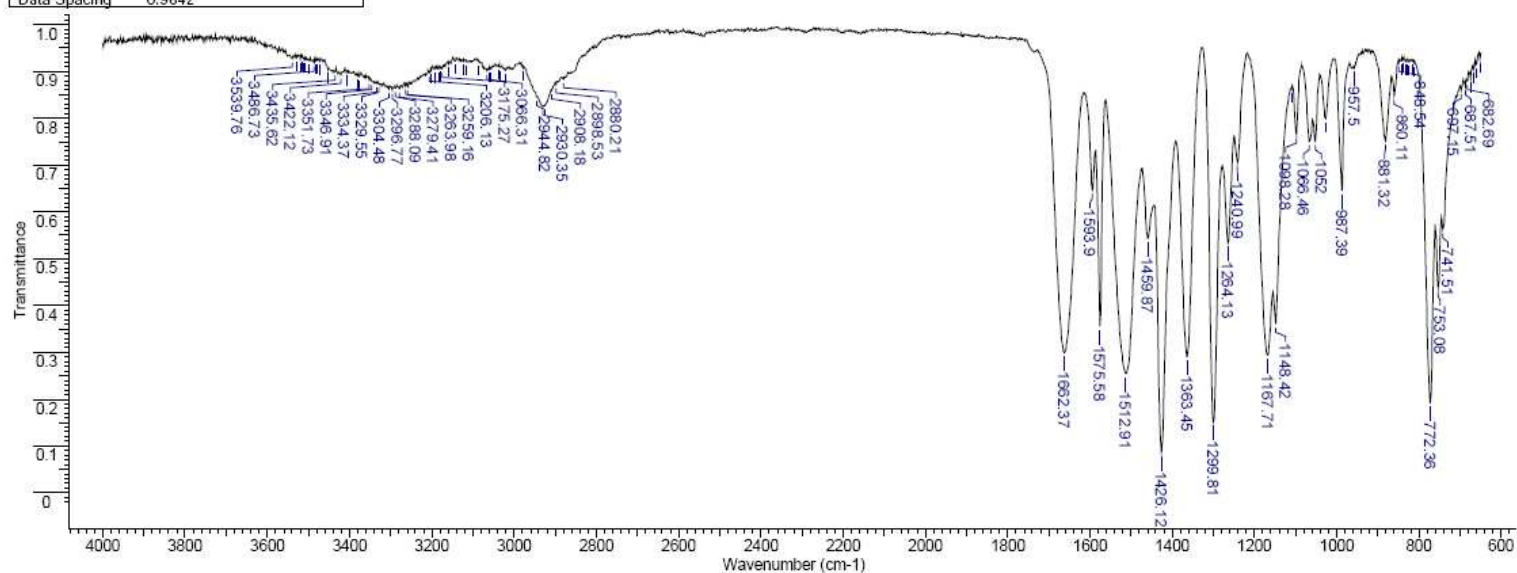

| No | cm-1   | T     | Intensity | No | cm-1    | T     | Intensity | No | cm-1    | T     | Intensity | No | cm-1    | T     | Intensity |
|----|--------|-------|-----------|----|---------|-------|-----------|----|---------|-------|-----------|----|---------|-------|-----------|
| 1  | 651.83 | 0.926 | VW        | 24 | 1052.00 | 0.751 | W         | 47 | 3034.49 | 0.908 | VW        | 70 | 3334.37 | 0.874 | W         |
| 2  | 661.48 | 0.913 | VW        | 25 | 1066.46 | 0.751 | W         | 48 | 3038.35 | 0.911 | VW        | 71 | 3346.91 | 0.879 | W         |
| 3  | 667.26 | 0.905 | W         | 26 | 1098.28 | 0.765 | W         | 49 | 3055.71 | 0.906 | VW        | 72 | 3351.73 | 0.881 | W         |
| 4  | 674.01 | 0.885 | W         | 27 | 1110.82 | 0.862 | W         | 50 | 3058.60 | 0.906 | VW        | 73 | 3375.84 | 0.889 | W         |
| 5  | 682.69 | 0.880 | W         | 28 | 1148.42 | 0.361 | S         | 51 | 3066.31 | 0.902 | W         | 74 | 3380.66 | 0.890 | W         |
| 6  | 687.51 | 0.869 | W         | 29 | 1167.71 | 0.294 | S         | 52 | 3085.60 | 0.920 | VW        | 75 | 3408.62 | 0.898 | W         |
| 7  | 697.15 | 0.860 | W         | 30 | 1240.99 | 0.704 | M         | 53 | 3114.53 | 0.920 | VW        | 76 | 3422.12 | 0.893 | W         |
| 8  | 741.51 | 0.563 | M         | 31 | 1264.13 | 0.534 | M         | 54 | 3121.27 | 0.921 | VW        | 77 | 3435.62 | 0.900 | W         |
| 9  | 753.08 | 0.439 | S         | 32 | 1299.81 | 0.151 | VS        | 55 | 3143.45 | 0.923 | VW        | 78 | 3452.98 | 0.905 | W         |
| 10 | 772.36 | 0.192 | S         | 33 | 1363.45 | 0.291 | S         | 56 | 3159.84 | 0.916 | VW        | 79 | 3473.23 | 0.922 | VW        |
| 11 | 810.93 | 0.918 | VW        | 34 | 1426.12 | 0.086 | VS        | 57 | 3175.27 | 0.905 | VW        | 80 | 3479.01 | 0.923 | VW        |
| 12 | 815.75 | 0.921 | VW        | 35 | 1459.87 | 0.543 | M         | 58 | 3179.13 | 0.907 | VW        | 81 | 3483.83 | 0.922 | VW        |
| 13 | 824.43 | 0.920 | VW        | 36 | 1512.91 | 0.255 | S         | 59 | 3182.99 | 0.907 | VW        | 82 | 3486.73 | 0.918 | VW        |
| 14 | 829.25 | 0.921 | VW        | 37 | 1575.58 | 0.356 | S         | 60 | 3193.59 | 0.904 | W         | 83 | 3499.26 | 0.923 | VW        |

# **<sup>1</sup>H-NMR:**

## **2b = 1,1-Dimethyl-3-pyridin-2-yl-urea**

|                        |                                                                                                                                          |                        |                      |                                |
|------------------------|------------------------------------------------------------------------------------------------------------------------------------------|------------------------|----------------------|--------------------------------|
| Acquisition Time (sec) | 9.9266                                                                                                                                   |                        |                      |                                |
| Comment                | ARC= 2009000163658 Labjournal 24'041B015 Labgroup ID mohrp Contact Person Name Stefan Buerli Contact Person Address 092/4.36A Theme 4652 |                        |                      |                                |
| Date                   | 03 Sep 2009 05:25:19                                                                                                                     | Date Stamp             | 03 Sep 2009 05:25:19 |                                |
| File Name              | C:\DOCUMENTS AND SETTINGS\MOHRP\LOCAL SETTINGS\TEMPORARY INTERNET FILES\CONTENT.IE5\BAZDHLFF\2009000163658_1000f11.JDX                   |                        |                      |                                |
| Frequency (MHz)        | 600.14                                                                                                                                   | Nucleus                | <sup>1</sup> H       | Number of Transients 8         |
| Origin                 | NMR Roche Basel                                                                                                                          | Original Points Count  | 131072               | Owner serv                     |
| Points Count           | 131072                                                                                                                                   | Solvent                | CHLOROFORM-d         | Spectrum Offset (Hz) 5691.0381 |
| Sweep Width (Hz)       | 13204.13                                                                                                                                 | Temperature (degree C) | 25.027               |                                |

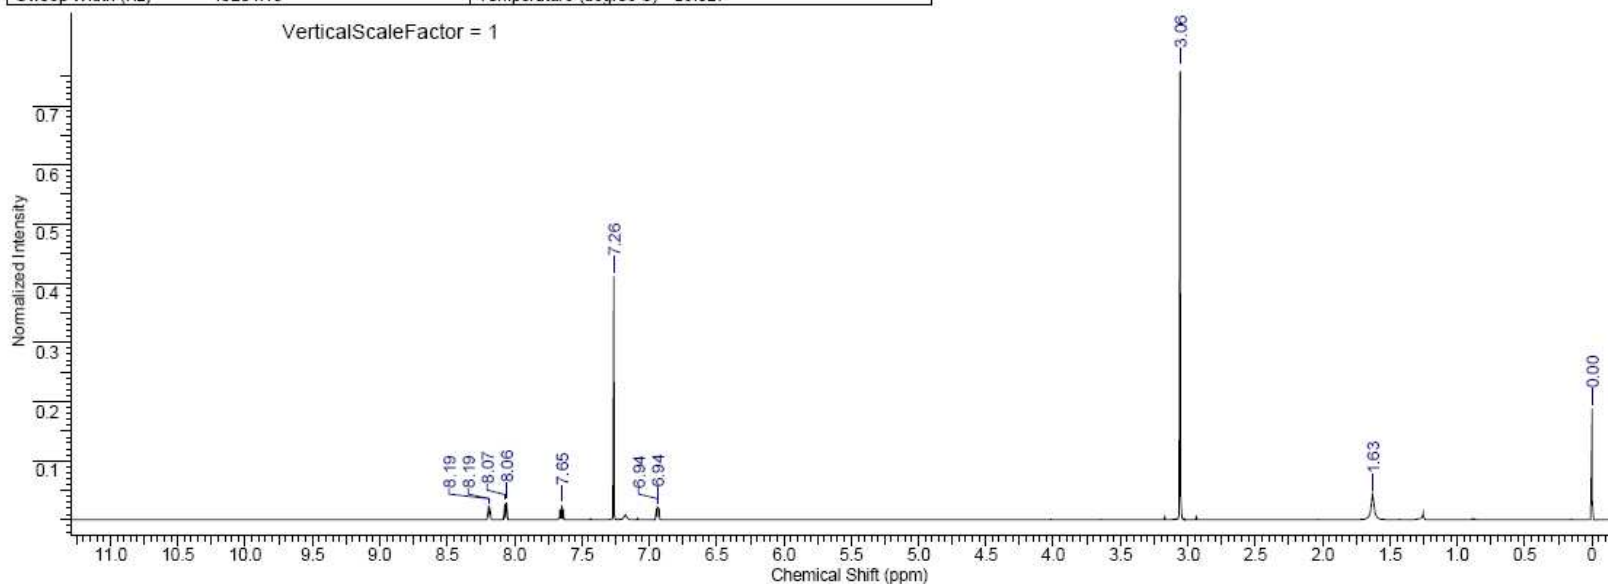

| (ppm) | (Hz)   | (ppm) | (Hz)   | No | Color | Structure | Visible |
|-------|--------|-------|--------|----|-------|-----------|---------|
| 0.00  | 0.1    | 7.65  | 4590.4 | 1  |       |           | True    |
| 1.63  | 977.5  | 7.65  | 4591.7 |    |       |           |         |
| 3.06  | 1834.7 | 8.06  | 4835.7 |    |       |           |         |
| 6.93  | 4161.4 | 8.07  | 4844.2 |    |       |           |         |
| 6.94  | 4162.8 | 8.19  | 4912.4 |    |       |           |         |
| 6.94  | 4163.8 | 8.19  | 4916.3 |    |       |           |         |
| 7.26  | 4358.6 | 8.19  | 4917.3 |    |       |           |         |
| 7.65  | 4589.9 |       |        |    |       |           |         |



# **<sup>13</sup>C-NMR:**

## **2b = 1,1-Dimethyl-3-pyridin-2-yl-urea**

|                        |                                                                                                                                          |                        |                      |                      |            |
|------------------------|------------------------------------------------------------------------------------------------------------------------------------------|------------------------|----------------------|----------------------|------------|
| Acquisition Time (sec) | 3.6351                                                                                                                                   |                        |                      |                      |            |
| Comment                | ARC= 2009000163658 Labjournal 24'041B015 Labgroup ID mohrp Contact Person Name Stefan Buerli Contact Person Address 092/4.36A Theme 4652 |                        |                      |                      |            |
| Date                   | 03 Sep 2009 05:48:34                                                                                                                     | Date Stamp             | 03 Sep 2009 05:48:34 |                      |            |
| File Name              | C:\DOCUMENTS AND SETTINGS\MOHRP\LOCAL SETTINGS\TEMPORARY INTERNET FILES\CONTENT\IE5\SRNHBLZW\2009000163658_1002\1\JDX                    |                        |                      |                      |            |
| Frequency (MHz)        | 150.92                                                                                                                                   | Nucleus                | <sup>13</sup> C      | Number of Transients | 512        |
| Origin                 | NMR Roche Basel                                                                                                                          | Original Points Count  | 131072               | Owner                | serv       |
| Points Count           | 131072                                                                                                                                   | Solvent                | CHLOROFORM-d         | Spectrum Offset (Hz) | 16603.7012 |
| Sweep Width (Hz)       | 36057.42                                                                                                                                 | Temperature (degree C) | 25.027               |                      |            |
|                        |                                                                                                                                          |                        |                      |                      |            |

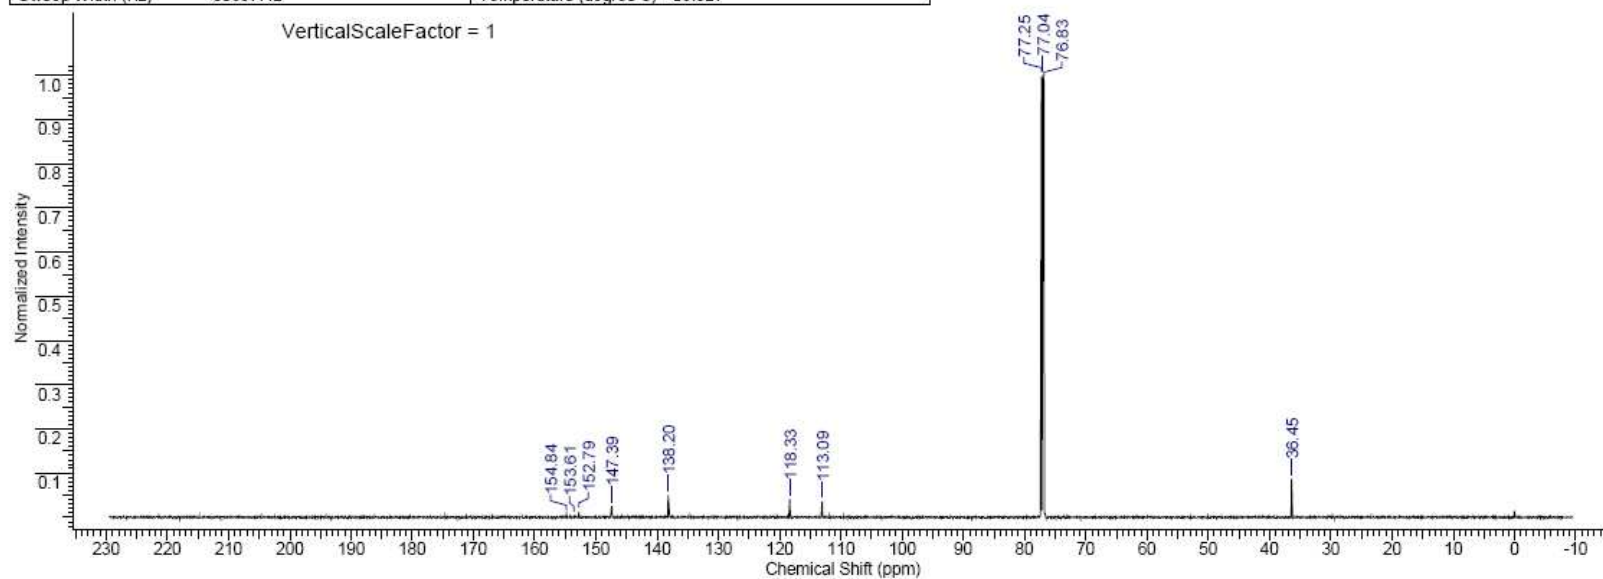

| (ppm)  | (Hz)    | (ppm)  | (Hz)    | No | Color | Structure | Visible |
|--------|---------|--------|---------|----|-------|-----------|---------|
| 36.45  | 5501.4  | 138.20 | 20857.1 | 1  |       |           | True    |
| 76.83  | 11594.6 | 147.39 | 22244.7 |    |       |           |         |
| 77.04  | 11626.5 | 152.79 | 23059.0 |    |       |           |         |
| 77.25  | 11658.4 | 153.61 | 23183.1 |    |       |           |         |
| 113.09 | 17067.9 | 154.84 | 23368.2 |    |       |           |         |
| 118.33 | 17857.7 |        |         |    |       |           |         |

## **2c] 1-Methyl-3-phenyl-urea**

Aniline (220 mg, 2.36 mmol) was dissolved in 2.3 ml of DMF and treated at 0°C with 293  $\mu$ l (4.73 mmol, 2 eq.) of isocyanatomethane. The flask was sealed with a rubber septum and the mixture stirred over night at ambient temperature. Pouring onto crashed ice, twofold extraction with ethyl acetate, washing with water, drying over MgSO<sub>4</sub>, and evaporation of all solvents, followed by crystallization from ethyl acetate / hexane, yielded 301 mg of the title compound as white crystals.

MS: C<sub>8</sub>H<sub>10</sub>N<sub>2</sub>O, expected: 150.079, found: 150.079.

IR:

2c = 1-Methyl-3-phenyl-urea

17 Dec 2009

|              |                                                                                                                               |        |                       |                |                      |
|--------------|-------------------------------------------------------------------------------------------------------------------------------|--------|-----------------------|----------------|----------------------|
| Title        | *E091016.502 24041B041                                                                                                        | Origin | Hoffmann-La Roche Ltd | Owner          | Nicolet              |
| File Name    | C:\DOCUMENTS AND SETTINGS\MOHRP\LOCAL SETTINGS\TEMPORARY INTERNET FILES\CONTENT\IE5\EV4BFG54\2009000165978-E091016-502\11.JDX |        |                       |                |                      |
| Date Stamp   | 08:47:08                                                                                                                      | Date   | 17 Dec 2009 14:51:54  | Technique      | Infrared             |
| X Axis       | Wavenumber (cm-1)                                                                                                             | Y Axis | Transmittance         | Spectrum Range | 649.9041 - 3999.7058 |
| Data Spacing | 0.9642                                                                                                                        |        |                       | Points Count   | 3475                 |

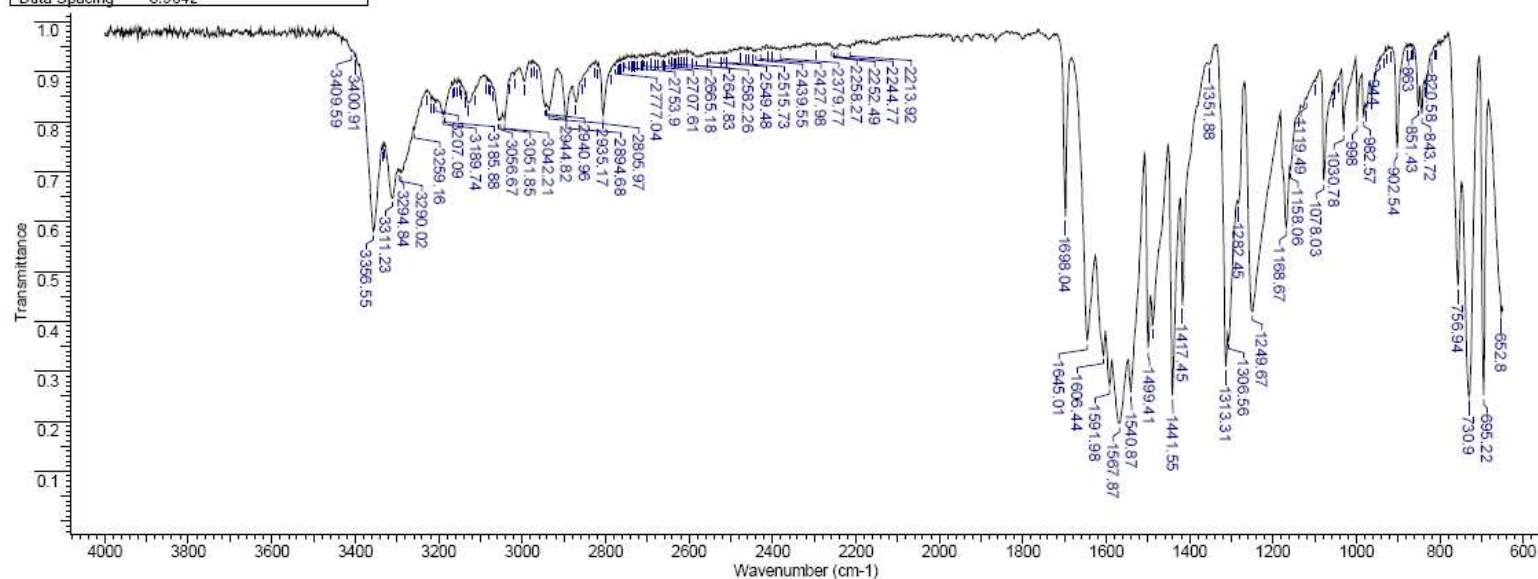

| No | cm-1   | T     | Intensity | No | cm-1    | T     | Intensity | No | cm-1    | T     | Intensity | No | cm-1    | T     | Intensity |
|----|--------|-------|-----------|----|---------|-------|-----------|----|---------|-------|-----------|----|---------|-------|-----------|
| 1  | 652.80 | 0.414 | S         | 27 | 1051.03 | 0.872 | W         | 53 | 2258.27 | 0.949 | VW        | 79 | 2647.83 | 0.933 | VW        |
| 2  | 695.22 | 0.252 | VS        | 28 | 1056.82 | 0.854 | W         | 54 | 2295.88 | 0.950 | VW        | 80 | 2657.47 | 0.929 | VW        |
| 3  | 730.90 | 0.249 | VS        | 29 | 1078.03 | 0.681 | M         | 55 | 2379.77 | 0.944 | VW        | 81 | 2661.33 | 0.930 | VW        |
| 4  | 756.94 | 0.471 | S         | 30 | 1098.28 | 0.880 | W         | 56 | 2400.98 | 0.946 | VW        | 82 | 2665.18 | 0.929 | VW        |
| 5  | 808.04 | 0.951 | VW        | 31 | 1119.49 | 0.846 | W         | 57 | 2409.66 | 0.946 | VW        | 83 | 2672.90 | 0.932 | VW        |
| 6  | 811.90 | 0.950 | VW        | 32 | 1138.78 | 0.815 | W         | 58 | 2427.98 | 0.943 | VW        | 84 | 2678.68 | 0.934 | VW        |
| 7  | 820.58 | 0.934 | VW        | 33 | 1158.06 | 0.704 | M         | 59 | 2439.55 | 0.940 | VW        | 85 | 2681.58 | 0.932 | VW        |
| 8  | 831.18 | 0.884 | W         | 34 | 1168.67 | 0.589 | M         | 60 | 2447.26 | 0.941 | VW        | 86 | 2691.22 | 0.933 | VW        |
| 9  | 835.04 | 0.877 | W         | 35 | 1249.67 | 0.420 | S         | 61 | 2457.87 | 0.944 | VW        | 87 | 2699.90 | 0.929 | VW        |
| 10 | 843.72 | 0.815 | W         | 36 | 1282.45 | 0.637 | M         | 62 | 2462.69 | 0.943 | VW        | 88 | 2707.61 | 0.928 | VW        |
| 11 | 851.43 | 0.830 | W         | 37 | 1306.56 | 0.362 | S         | 63 | 2465.59 | 0.945 | VW        | 89 | 2711.47 | 0.930 | VW        |
| 12 | 863.00 | 0.948 | VW        | 38 | 1313.31 | 0.310 | S         | 64 | 2478.12 | 0.945 | VW        | 90 | 2715.33 | 0.929 | VW        |
| 13 | 865.90 | 0.952 | VW        | 39 | 1351.88 | 0.915 | VW        | 65 | 2511.87 | 0.936 | VW        | 91 | 2723.04 | 0.928 | VW        |
| 14 | 869.70 | 0.950 | VW        | 40 | 1447.45 | 0.422 | S         | 66 | 2545.72 | 0.926 | VW        | 92 | 2739.92 | 0.927 | VW        |

# 1H-NMR:

2c = 1-Methyl-3-phenyl-urea

|                        |                                                                                                                                         |                        |                      |                      |           |
|------------------------|-----------------------------------------------------------------------------------------------------------------------------------------|------------------------|----------------------|----------------------|-----------|
| Acquisition Time (sec) | 9.9266                                                                                                                                  |                        |                      |                      |           |
| Comment                | ARC= 2009000165978 Labjournal 24041B041 Labgroup ID mohrp Contact Person Name Stefan Buerli Contact Person Address 092/4.36A Theme 4652 |                        |                      |                      |           |
| Date                   | 16 Oct 2009 06:32:34                                                                                                                    | Date Stamp             | 16 Oct 2009 06:32:34 |                      |           |
| File Name              | C:\DOCUMENTS AND SETTINGS\MOHRPI\LOCAL SETTINGS\TEMPORARY INTERNET FILES\CONTENT.IE5\OLSS5AZO5\2009000165978_1000f11.JDX                |                        |                      |                      |           |
| Frequency (MHz)        | 600.14                                                                                                                                  | Nucleus                | 1H                   | Number of Transients | 8         |
| Origin                 | NMR Roche Basel                                                                                                                         | Original Points Count  | 131072               | Owner                | serv      |
| Points Count           | 131072                                                                                                                                  | Solvent                | CHLOROFORM-d         | Spectrum Offset (Hz) | 5690.5352 |
| Sweep Width (Hz)       | 13204.13                                                                                                                                | Temperature (degree C) | 25.027               |                      |           |

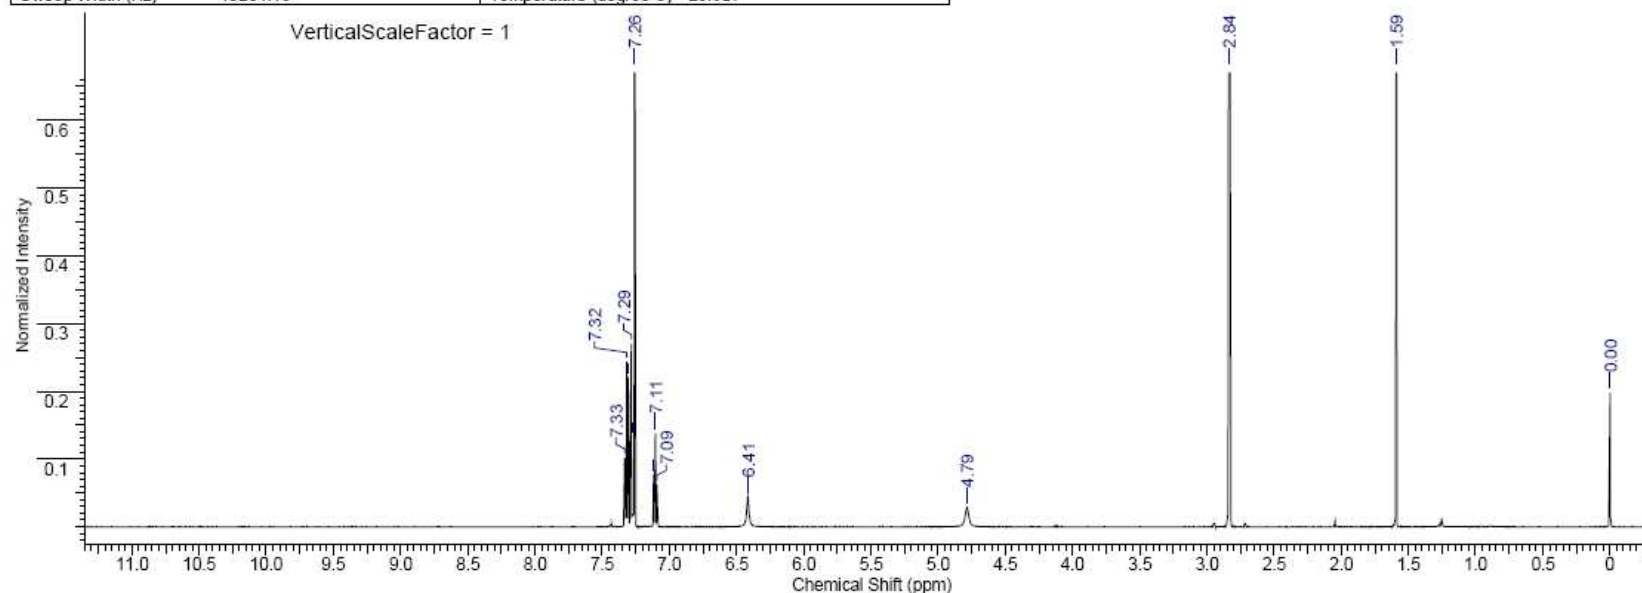

| (ppm) | (Hz)   | (ppm) | (Hz)   | (ppm) | (Hz)   | No | Color | Structure | Visible |
|-------|--------|-------|--------|-------|--------|----|-------|-----------|---------|
| 0.00  | 0.1    | 7.11  | 4264.1 | 7.29  | 4372.0 | 1  |       |           | True    |
| 1.59  | 955.5  | 7.11  | 4265.4 | 7.29  | 4373.3 |    |       |           |         |
| 2.83  | 1698.2 | 7.11  | 4269.9 | 7.30  | 4383.2 |    |       |           |         |
| 2.84  | 1703.1 | 7.12  | 4271.3 | 7.31  | 4384.8 |    |       |           |         |
| 4.79  | 2872.7 | 7.12  | 4272.7 | 7.31  | 4386.9 |    |       |           |         |
| 6.41  | 3849.8 | 7.26  | 4357.9 | 7.32  | 4392.0 |    |       |           |         |
| 7.09  | 4255.5 | 7.27  | 4361.6 | 7.32  | 4393.3 |    |       |           |         |
| 7.09  | 4256.9 | 7.27  | 4363.4 | 7.33  | 4398.6 |    |       |           |         |
| 7.10  | 4258.3 | 7.27  | 4364.6 | 7.33  | 4400.5 |    |       |           |         |
| 7.10  | 4262.9 | 7.28  | 4369.8 |       |        |    |       |           |         |

# **<sup>13</sup>C-NMR:**

2c = 1-Methyl-3-phenyl-urea

|                        |                                                                                                                                         |                        |                      |                      |            |
|------------------------|-----------------------------------------------------------------------------------------------------------------------------------------|------------------------|----------------------|----------------------|------------|
| Acquisition Time (sec) | 3.6351                                                                                                                                  |                        |                      |                      |            |
| Comment                | ARC= 2009000165978 Labjournal 24041B041 Labgroup ID mohrp Contact Person Name Stefan Buerli Contact Person Address 092/4.36A Theme 4652 |                        |                      |                      |            |
| Date                   | 16 Oct 2009 06:46:33                                                                                                                    | Date Stamp             | 16 Oct 2009 06:46:33 |                      |            |
| File Name              | C:\DOCUMENTS AND SETTINGS\MOHRP\LOCAL SETTINGS\TEMPORARY INTERNET FILES\CONTENT\IE5\W14NAXY5\2009000165978_1002\1\JDX                   |                        |                      |                      |            |
| Frequency (MHz)        | 150.92                                                                                                                                  | Nucleus                | <sup>13</sup> C      | Number of Transients | 256        |
| Origin                 | NMR Roche Basel                                                                                                                         | Original Points Count  | 131072               | Owner                | serv       |
| Points Count           | 131072                                                                                                                                  | Solvent                | CHLOROFORM-d         | Spectrum Offset (Hz) | 16603.6426 |
| Sweep Width (Hz)       | 36057.42                                                                                                                                | Temperature (degree C) | 25.027               |                      |            |

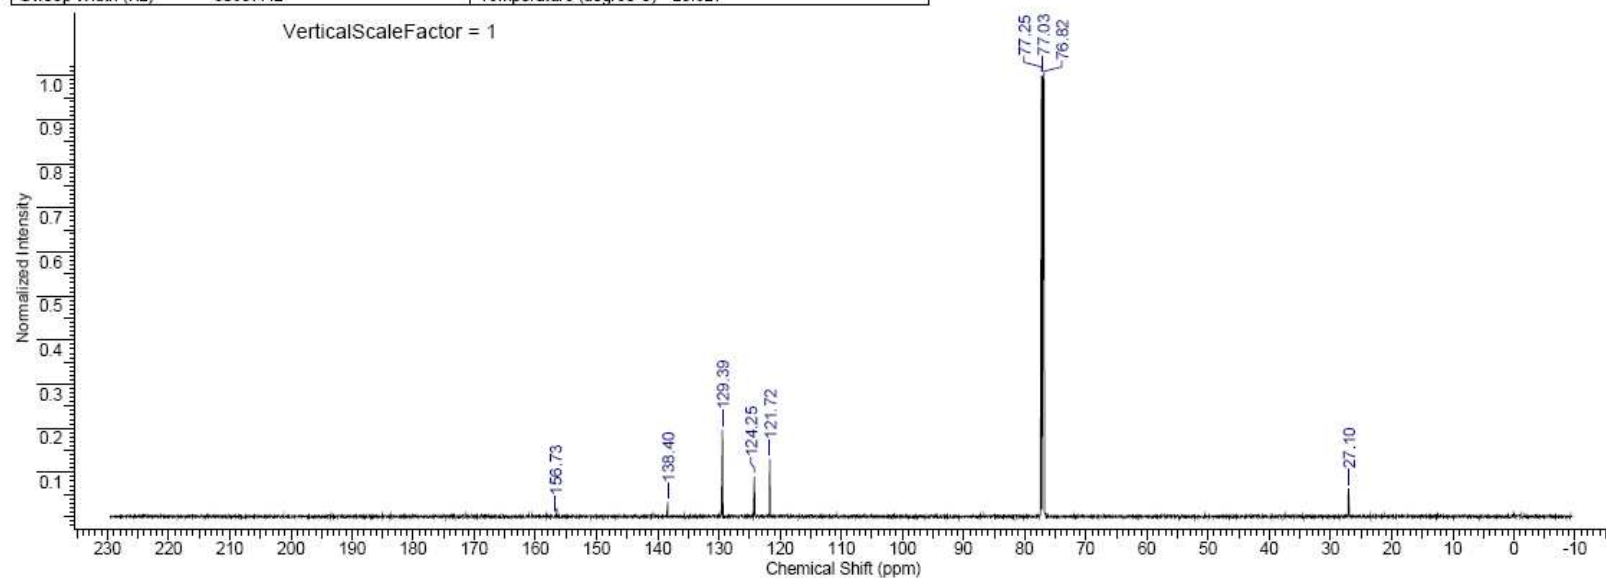

| (ppm)  | (Hz)    |
|--------|---------|
| 27.10  | 4089.3  |
| 76.82  | 11594.0 |
| 77.03  | 11625.9 |
| 77.25  | 11657.8 |
| 121.72 | 18370.2 |
| 124.25 | 18751.5 |
| 129.39 | 19528.1 |
| 138.40 | 20887.3 |
| 156.73 | 23654.3 |

| No | Color | Structure | Visible |
|----|-------|-----------|---------|
| 1  |       |           | True    |

## **2d] 1-Methyl-3-pyridin-2-yl-urea**

Pyridin-2-ylamine (59 mg, 0.627 mmol) was dissolved in 1.0 ml of DMF and treated at 0°C with 78 µl (1.25 mmol, 2 eq.) of isocyanatomethane. The flask was sealed with a rubber septum and the mixture stirred over night at ambient temperature. Pouring onto crashed ice, twofold extraction with ethyl acetate, washing with water, drying over MgSO<sub>4</sub>, and evaporation of all solvents, followed by crystallization from ethyl acetate / hexane, yielded 66 mg of the title compound as white crystals.

**IR:**

17 Dec 2009

|              |                                                                                                                                |        |                       |                |                      |                    |
|--------------|--------------------------------------------------------------------------------------------------------------------------------|--------|-----------------------|----------------|----------------------|--------------------|
| Title        | *E090820.539.24041B011                                                                                                         | Origin | Hoffmann-La Roche Ltd | Owner          | Nicolet              |                    |
| File Name    | C:\DOCUMENTS AND SETTINGS\MOHRP\LOCAL SETTINGS\TEMPORARY INTERNET FILES\CONTENT\IE5\IM14NAXY5\2009000162941-E090820-539[1].JDX |        |                       |                |                      |                    |
| Date Stamp   | 15:49:48                                                                                                                       | Date   | 17 Dec 2009 15:27:34  | Technique      | Infrared             | Spectral Region IR |
| X Axis       | Wavenumber (cm-1)                                                                                                              | Y Axis | Transmittance         | Spectrum Range | 649.9041 - 3999.7058 | Points Count 3475  |
| Data Spacing | 0.9642                                                                                                                         |        |                       |                |                      |                    |

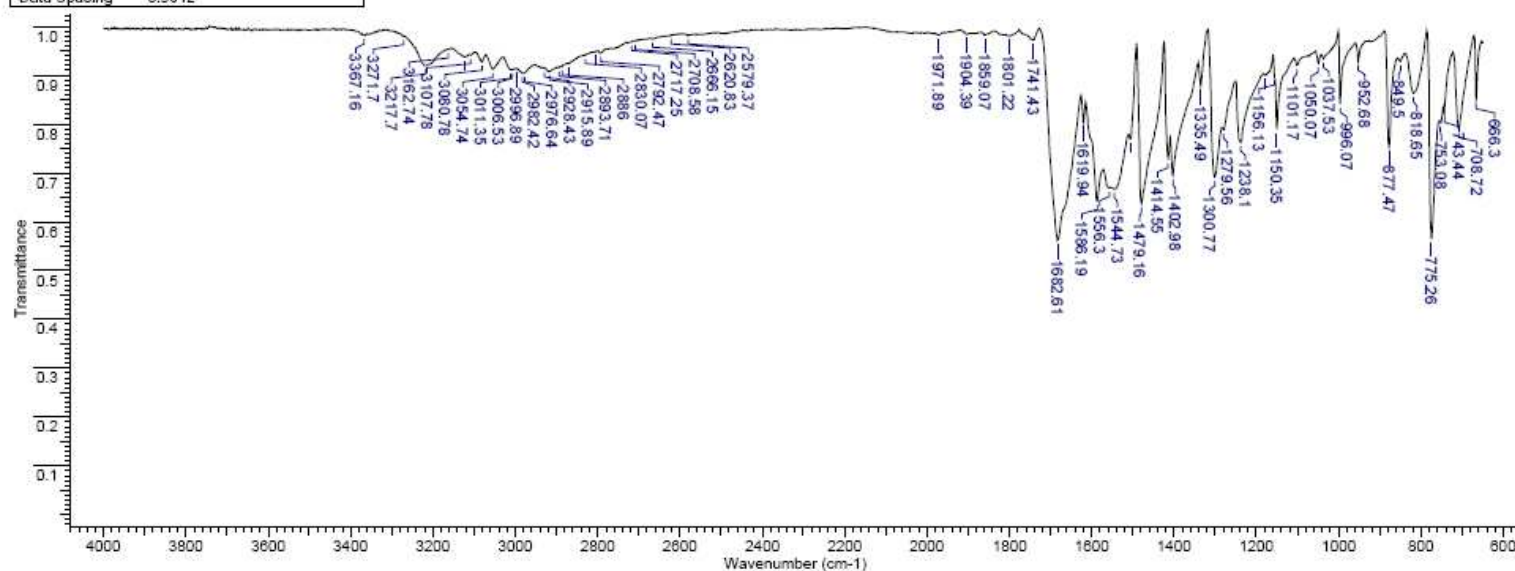

| No | cm-1    | T     | Intensity |
|----|---------|-------|-----------|----|---------|-------|-----------|----|---------|-------|-----------|----|---------|-------|-----------|
| 1  | 866.30  | 0.848 | M         | 17 | 1238.10 | 0.782 | M         | 33 | 1904.39 | 0.983 | VW        | 49 | 2982.42 | 0.904 | W         |
| 2  | 708.72  | 0.790 | M         | 18 | 1279.66 | 0.788 | M         | 34 | 1971.89 | 0.682 | VW        | 50 | 2996.99 | 0.913 | W         |
| 3  | 743.44  | 0.821 | M         | 19 | 1300.77 | 0.691 | S         | 35 | 2579.37 | 0.982 | VW        | 51 | 3008.63 | 0.911 | W         |
| 4  | 753.08  | 0.802 | M         | 20 | 1335.49 | 0.878 | W         | 36 | 2620.83 | 0.981 | VW        | 52 | 3011.35 | 0.911 | W         |
| 5  | 775.26  | 0.666 | VS        | 21 | 1402.68 | 0.694 | S         | 37 | 2666.15 | 0.674 | VW        | 53 | 3054.74 | 0.913 | W         |
| 6  | 818.66  | 0.863 | M         | 22 | 1414.65 | 0.727 | S         | 38 | 2708.68 | 0.970 | VW        | 54 | 3080.78 | 0.928 | W         |
| 7  | 849.50  | 0.929 | W         | 23 | 1479.16 | 0.637 | S         | 39 | 2717.25 | 0.668 | VW        | 55 | 3107.78 | 0.641 | W         |
| 8  | 877.47  | 0.752 | M         | 24 | 1506.16 | 0.789 | M         | 40 | 2792.47 | 0.645 | W         | 56 | 3122.24 | 0.937 | W         |
| 9  | 952.68  | 0.927 | W         | 25 | 1544.73 | 0.687 | S         | 41 | 2805.97 | 0.948 | W         | 57 | 3162.74 | 0.952 | W         |
| 10 | 996.07  | 0.841 | M         | 26 | 1556.30 | 0.669 | S         | 42 | 2830.07 | 0.841 | W         | 58 | 3214.81 | 0.620 | W         |
| 11 | 1037.53 | 0.933 | W         | 27 | 1588.19 | 0.642 | S         | 43 | 2870.67 | 0.923 | W         | 59 | 3217.70 | 0.919 | W         |
| 12 | 1050.07 | 0.923 | W         | 28 | 1619.94 | 0.803 | M         | 44 | 2886.00 | 0.918 | W         | 60 | 3271.70 | 0.979 | VW        |
| 13 | 1101.17 | 0.920 | W         | 29 | 1682.61 | 0.681 | VS        | 45 | 2893.71 | 0.615 | W         | 61 | 3367.16 | 0.661 | VW        |
| 14 | 1150.35 | 0.789 | M         | 30 | 1741.43 | 0.872 | VW        | 46 | 2915.89 | 0.807 | W         |    |         |       |           |



# 1H-NMR:

## 2d = 1-Methyl-3-pyridin-2-yl-urea

|                        |                                                                                                                                         |                        |                      |                                |
|------------------------|-----------------------------------------------------------------------------------------------------------------------------------------|------------------------|----------------------|--------------------------------|
| Acquisition Time (sec) | 9.9266                                                                                                                                  |                        |                      |                                |
| Comment                | ARC= 2009000162941 Labjournal 24041B011 Labgroup ID mohrp Contact Person Name Stefan Buerli Contact Person Address 092/4.36A Theme 4652 |                        |                      |                                |
| Date                   | 20 Aug 2009 08:55:07                                                                                                                    | Date Stamp             | 20 Aug 2009 08:55:07 |                                |
| File Name              | C:\DOCUMENTS AND SETTINGS\MOHRP\LOCAL SETTINGS\TEMPORARY INTERNET FILES\CONTENT\IE5\OLSSAZO5\2009000162941_1000f11.JDX                  |                        |                      |                                |
| Frequency (MHz)        | 600.14                                                                                                                                  | Nucleus                | 1H                   | Number of Transients 8         |
| Origin                 | NMR Roche Basel                                                                                                                         | Original Points Count  | 131072               | Owner serv                     |
| Points Count           | 131072                                                                                                                                  | Solvent                | CHLOROFORM-d         | Spectrum Offset (Hz) 5690.8223 |
| Sweep Width (Hz)       | 13204.13                                                                                                                                | Temperature (degree C) | 25.027               |                                |

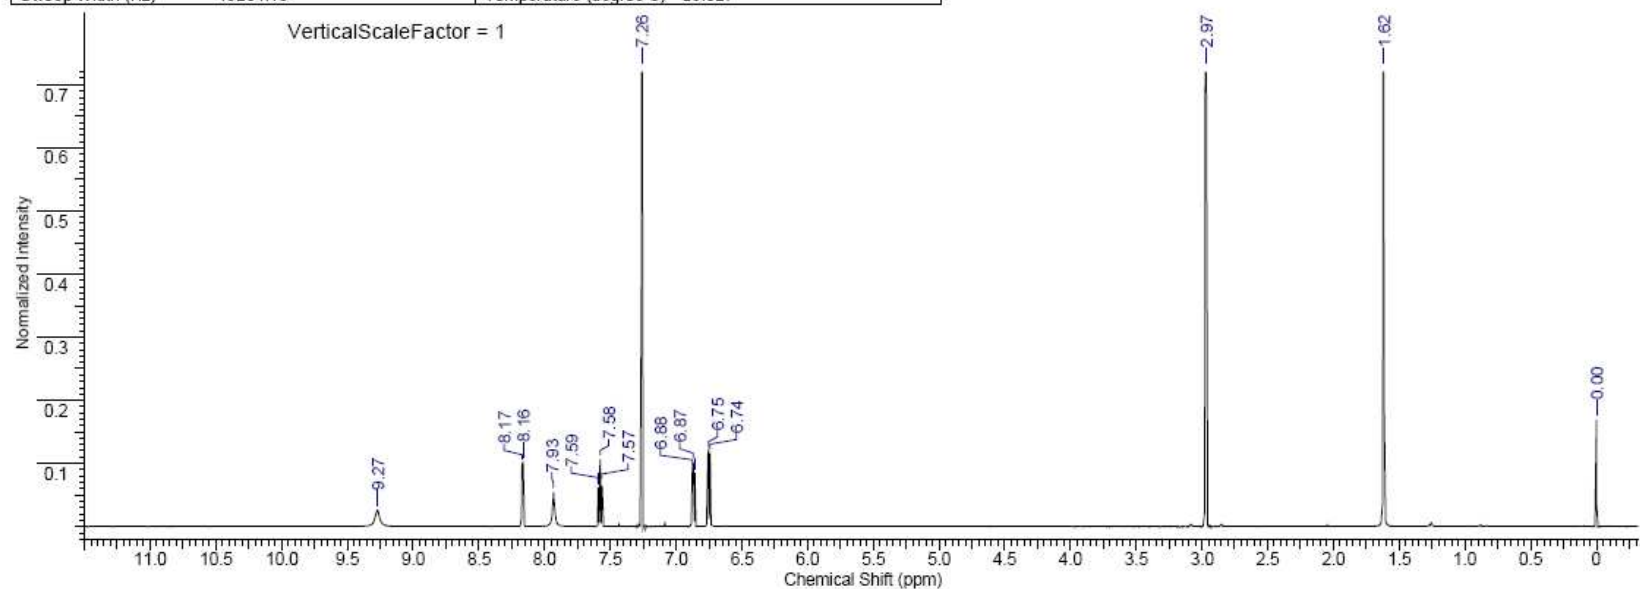

| (ppm) | (Hz)   | (ppm) | (Hz)   | (ppm) | (Hz)   | No | Color | Structure | Visible |
|-------|--------|-------|--------|-------|--------|----|-------|-----------|---------|
| 0.00  | 0.2    | 6.87  | 4121.9 | 7.59  | 4556.4 | 1  |       |           | True    |
| 1.62  | 971.2  | 6.88  | 4127.2 | 7.93  | 4759.9 |    |       |           |         |
| 2.97  | 1779.8 | 7.26  | 4358.7 | 8.16  | 4898.2 |    |       |           |         |
| 2.97  | 1784.6 | 7.56  | 4539.0 | 8.16  | 4899.2 |    |       |           |         |
| 6.74  | 4045.5 | 7.57  | 4540.9 | 8.17  | 4902.6 |    |       |           |         |
| 6.75  | 4053.7 | 7.58  | 4546.5 | 8.17  | 4903.3 |    |       |           |         |
| 6.86  | 4114.8 | 7.58  | 4547.5 | 8.17  | 4904.3 |    |       |           |         |
| 6.86  | 4119.9 | 7.58  | 4548.3 | 9.27  | 5564.2 |    |       |           |         |
| 6.87  | 4120.7 | 7.59  | 4554.6 |       |        |    |       |           |         |

# **<sup>13</sup>C-NMR:**

## **2d = 1-Methyl-3-pyridin-2-yl-urea**

|                        |                                                                                                                                         |                        |                      |                                 |
|------------------------|-----------------------------------------------------------------------------------------------------------------------------------------|------------------------|----------------------|---------------------------------|
| Acquisition Time (sec) | 3.6351                                                                                                                                  |                        |                      |                                 |
| Comment                | ARC= 2009000162941 Labjournal 24041B011 Labgroup ID mohrp Contact Person Name Stefan Buerli Contact Person Address 092/4.36A Theme 4652 |                        |                      |                                 |
| Date                   | 20 Aug 2009 09:18:44                                                                                                                    | Date Stamp             | 20 Aug 2009 09:18:44 |                                 |
| File Name              | C:\DOCUMENTS AND SETTINGS\MOHRP\LOCAL SETTINGS\TEMPORARY INTERNET FILES\CONTENT.IE5\2CZSS3VR\2009000162941_1002[1].JDX                  |                        |                      |                                 |
| Frequency (MHz)        | 150.92                                                                                                                                  | Nucleus                | <sup>13</sup> C      | Number of Transients 512        |
| Origin                 | NMR Roche Basel                                                                                                                         | Original Points Count  | 131072               | Owner serv                      |
| Points Count           | 131072                                                                                                                                  | Solvent                | CHLOROFORM-d         | Spectrum Offset (Hz) 16603.7480 |
| Sweep Width (Hz)       | 36057.42                                                                                                                                | Temperature (degree C) | 25.027               |                                 |

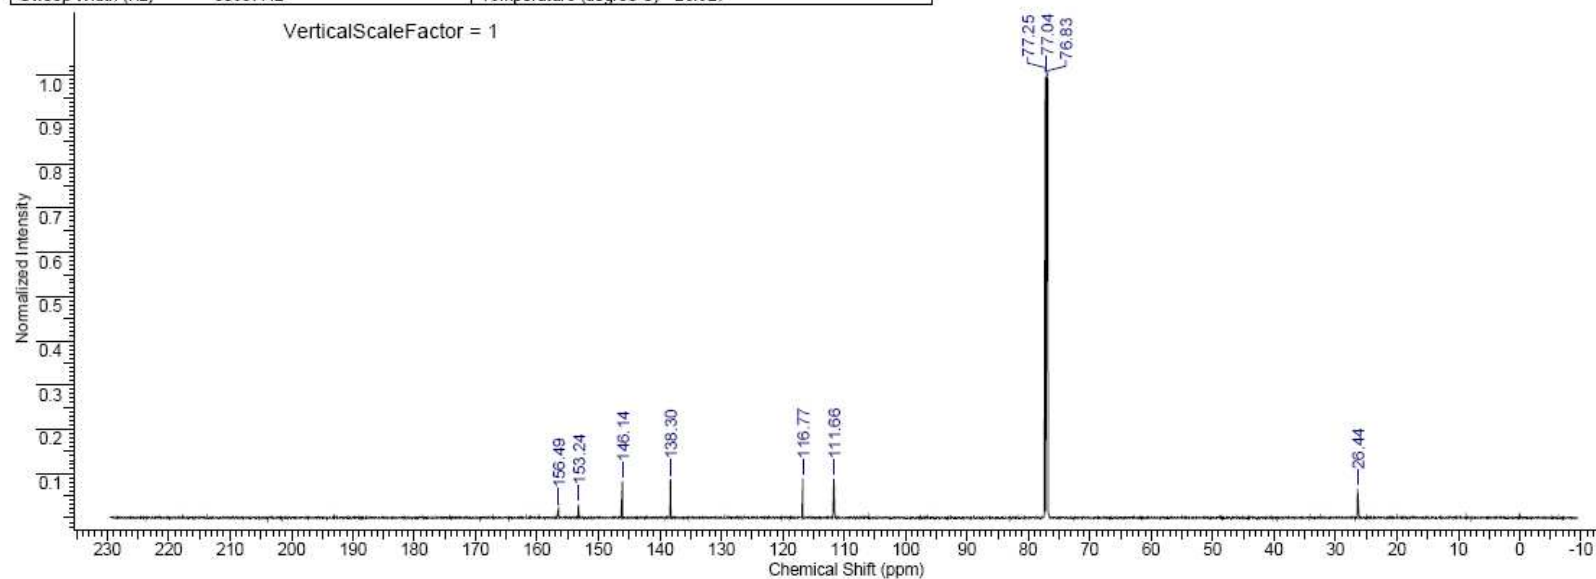

| (ppm)  | (Hz)    | No | Color | Structure | Visible |
|--------|---------|----|-------|-----------|---------|
| 26.44  | 3989.8  | 1  |       |           | True    |
| 76.83  | 11594.6 |    |       |           |         |
| 77.04  | 11626.5 |    |       |           |         |
| 77.25  | 11658.4 |    |       |           |         |
| 111.66 | 16852.0 |    |       |           |         |
| 116.77 | 17622.9 |    |       |           |         |
| 138.30 | 20872.9 |    |       |           |         |
| 146.14 | 22056.1 |    |       |           |         |
| 153.24 | 23126.5 |    |       |           |         |
| 156.49 | 23617.5 |    |       |           |         |

### 3a] *N*-(1-Methyl-1*H*-benzoimidazol-2-yl)-acetamide

1-Methyl-1*H*-benzoimidazol-2-ylamine (428 mg, 2.91 mmol) was dissolved in 9.0 ml of CH<sub>2</sub>Cl<sub>2</sub> and successively treated at -10°C with 258 µl (3.20 mmol, 1.1 eq.) of pyridine and 218 µl (3.05 mmol, 1.05 eq.) of acetyl chloride. MS indicated after 2 h a mixture of starting material, mono- and di-acetate. Pouring onto crashed ice, twofold extraction with ethyl acetate, washing with water, drying over MgSO<sub>4</sub>, and evaporation of all solvents, followed by flash chromatography (SiO<sub>2</sub>, ethyl acetate / heptane = 6 / 4) and ensuing crystallization from hexane / ethyl acetate afforded 94 mg of the title compound as white crystals.

MS: C<sub>10</sub>H<sub>11</sub>N<sub>3</sub>O, expected: 189.0902, found: 189.0905.

IR:

3a = N-(1-Methyl-1H-benzoimidazol-2-yl)-acetamide

17 Dec 2009

|              |                                                                                                                               |        |                       |                |                      |
|--------------|-------------------------------------------------------------------------------------------------------------------------------|--------|-----------------------|----------------|----------------------|
| Title        | *E090807.507 24041B004                                                                                                        | Origin | Hoffmann-La Roche Ltd | Owner          | Nicolet              |
| File Name    | C:\DOCUMENTS AND SETTINGS\MOHRP\LOCAL SETTINGS\TEMPORARY INTERNET FILES\CONTENT\IE3\OL55AZO5\2009000162265-E090807-507[1].JDX |        |                       |                |                      |
| Date Stamp   | 13:30:02                                                                                                                      | Date   | 17 Dec 2009 15:31:08  | Technique      | Infrared             |
| X Axis       | Wavenumber (cm-1)                                                                                                             | Y Axis | Transmittance         | Spectrum Range | 649.9041 - 3999.7058 |
| Data Spacing | 0.9642                                                                                                                        |        |                       | Points Count   | 3475                 |

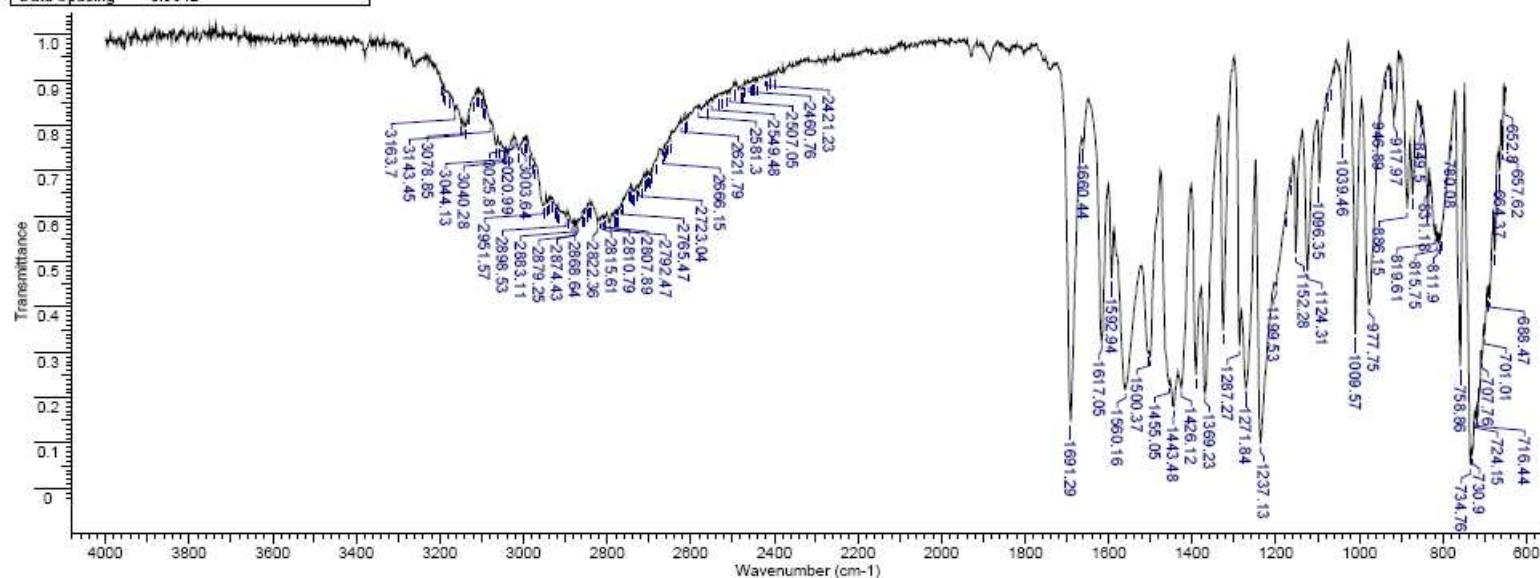

| No | cm-1   | T     | Intensity | No | cm-1    | T     | Intensity | No | cm-1    | T     | Intensity | No | cm-1    | T     | Intensity |
|----|--------|-------|-----------|----|---------|-------|-----------|----|---------|-------|-----------|----|---------|-------|-----------|
| 1  | 652.80 | 0.843 | W         | 27 | 886.15  | 0.616 | M         | 53 | 1506.16 | 0.300 | S         | 79 | 2607.33 | 0.815 | W         |
| 2  | 657.62 | 0.745 | W         | 28 | 917.97  | 0.813 | W         | 54 | 1580.16 | 0.218 | S         | 80 | 2613.12 | 0.811 | W         |
| 3  | 664.37 | 0.899 | M         | 29 | 926.64  | 0.910 | W         | 55 | 1592.94 | 0.484 | M         | 81 | 2621.79 | 0.805 | W         |
| 4  | 675.64 | 0.522 | M         | 30 | 937.25  | 0.909 | W         | 56 | 1617.05 | 0.324 | S         | 82 | 2648.79 | 0.769 | W         |
| 5  | 688.47 | 0.419 | S         | 31 | 946.89  | 0.849 | W         | 57 | 1660.44 | 0.758 | W         | 83 | 2653.61 | 0.764 | W         |
| 6  | 692.33 | 0.420 | S         | 32 | 977.75  | 0.405 | S         | 58 | 1691.29 | 0.148 | VS        | 84 | 2657.47 | 0.757 | W         |
| 7  | 701.01 | 0.337 | S         | 33 | 1009.67 | 0.340 | S         | 59 | 2400.02 | 0.909 | W         | 85 | 2661.33 | 0.751 | W         |
| 8  | 707.76 | 0.285 | S         | 34 | 1039.46 | 0.787 | W         | 60 | 2409.66 | 0.910 | W         | 86 | 2666.15 | 0.734 | W         |
| 9  | 716.44 | 0.156 | S         | 35 | 1069.35 | 0.896 | W         | 61 | 2415.44 | 0.906 | W         | 87 | 2682.54 | 0.723 | M         |
| 10 | 720.29 | 0.186 | S         | 36 | 1077.07 | 0.859 | W         | 62 | 2421.23 | 0.906 | W         | 88 | 2691.22 | 0.700 | M         |
| 11 | 724.15 | 0.153 | S         | 37 | 1096.35 | 0.672 | M         | 63 | 2441.48 | 0.895 | W         | 89 | 2697.01 | 0.690 | M         |
| 12 | 728.01 | 0.087 | VS        | 38 | 1124.31 | 0.480 | M         | 64 | 2446.30 | 0.897 | W         | 90 | 2700.86 | 0.693 | M         |
| 13 | 730.90 | 0.073 | VS        | 39 | 1152.28 | 0.517 | M         | 65 | 2452.09 | 0.896 | W         | 91 | 2703.75 | 0.691 | M         |
| 14 | 734.76 | 0.051 | VS        | 40 | 1163.85 | 0.677 | M         | 66 | 2455.94 | 0.896 | W         | 92 | 2709.54 | 0.685 | M         |

# 1H-NMR:

3a = N-(1-Methyl-1H-benzoimidazol-2-yl)-acetamide in CDCl<sub>3</sub> at ambient temperature

|                        |                                                                                                                                         |                        |                      |                                |
|------------------------|-----------------------------------------------------------------------------------------------------------------------------------------|------------------------|----------------------|--------------------------------|
| Acquisition Time (sec) | 9.9266                                                                                                                                  |                        |                      |                                |
| Comment                | ARC= 2009000162265 Labjournal 24041B004 Labgroup ID mohrp Contact Person Name Stefan Buerli Contact Person Address 092/4.36A Theme 4652 |                        |                      |                                |
| Date                   | 08 Aug 2009 04:19:26                                                                                                                    | Date Stamp             | 08 Aug 2009 04:19:26 |                                |
| File Name              | C:\DOCUMENTS AND SETTINGS\MOHRP\LOCAL SETTINGS\TEMPORARY INTERNET FILES\CONTENT.IE5\MT92FAHG\2009000162265_1000[2].JDX                  |                        |                      |                                |
| Frequency (MHz)        | 600.14                                                                                                                                  | Nucleus                | 1H                   | Number of Transients 8         |
| Origin                 | NMR Roche Basel                                                                                                                         | Original Points Count  | 131072               | Owner serv                     |
| Points Count           | 131072                                                                                                                                  | Solvent                | CHLOROFORM-d         | Spectrum Offset (Hz) 5690.5703 |
| Sweep Width (Hz)       | 13204.13                                                                                                                                | Temperature (degree C) | 25.027               |                                |

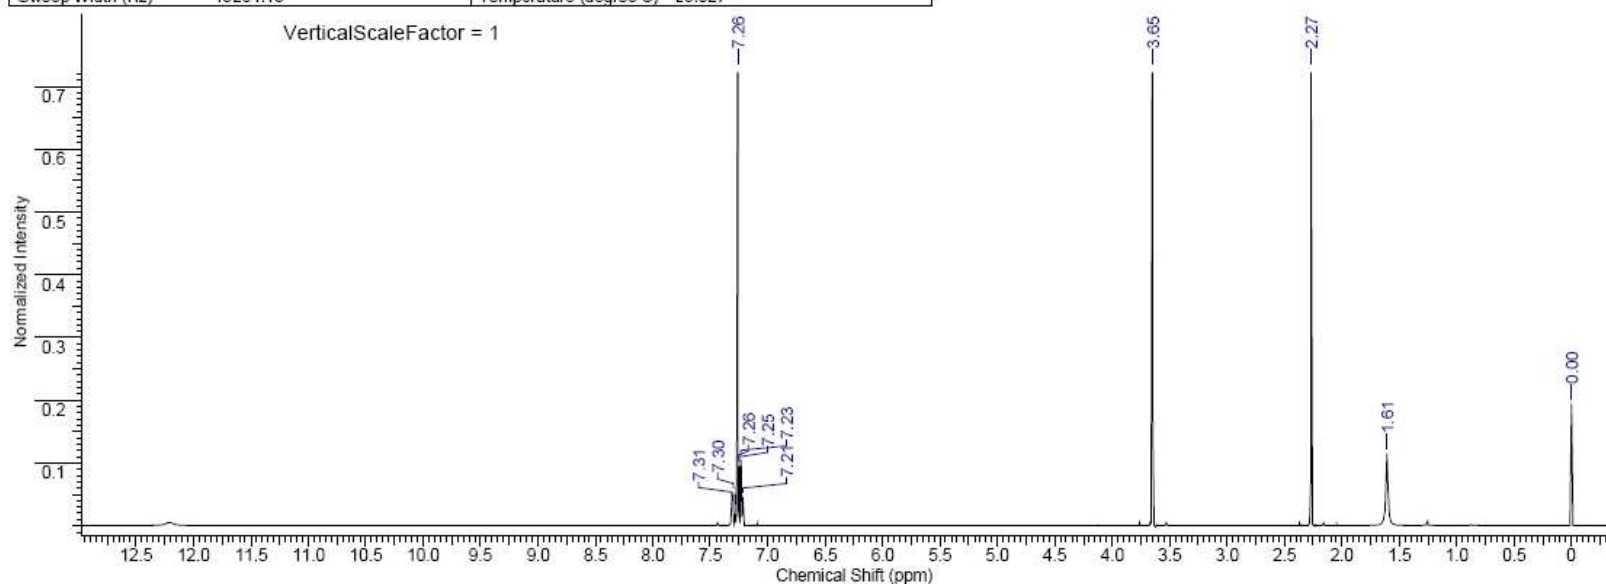

| (ppm) | (Hz)   | (ppm) | (Hz)   | No | Color | Structure | Visible |
|-------|--------|-------|--------|----|-------|-----------|---------|
| 0.00  | 0.1    | 7.25  | 4349.8 | 1  |       |           | True    |
| 1.61  | 965.4  | 7.25  | 4352.9 |    |       |           |         |
| 2.27  | 1360.4 | 7.26  | 4354.4 |    |       |           |         |
| 3.65  | 2189.5 | 7.26  | 4358.3 |    |       |           |         |
| 7.21  | 4329.8 | 7.27  | 4360.3 |    |       |           |         |
| 7.22  | 4333.1 | 7.27  | 4361.8 |    |       |           |         |
| 7.22  | 4334.6 | 7.28  | 4368.0 |    |       |           |         |
| 7.23  | 4338.2 | 7.28  | 4369.2 |    |       |           |         |
| 7.23  | 4340.7 | 7.30  | 4380.9 |    |       |           |         |
| 7.24  | 4342.2 | 7.31  | 4388.6 |    |       |           |         |
| 7.25  | 4348.1 |       |        |    |       |           |         |

3a = N-(1-Methyl-1H-benzoimidazol-2-yl)-acetamide in DMSO at ambient temperature

|                        |                                                                                                                                         |                        |                      |                                |
|------------------------|-----------------------------------------------------------------------------------------------------------------------------------------|------------------------|----------------------|--------------------------------|
| Acquisition Time (sec) | 3.7224                                                                                                                                  |                        |                      |                                |
| Comment                | ARC= 2009000162265 Labjournal 24041B004 Labgroup ID mohrp Contact Person Name Stefan Buerli Contact Person Address 092/4.36A Theme 4652 |                        |                      |                                |
| Date                   | 21 Oct 2009 05:58:41                                                                                                                    | Date Stamp             | 21 Oct 2009 05:58:41 |                                |
| File Name              | C:\DOCUMENTS AND SETTINGS\MOHRP\LOCAL SETTINGS\TEMPORARY INTERNET FILES\CONTENT.IE5\RUC7ZL0X\2009000162265_21[1].JDX                    |                        |                      |                                |
| Frequency (MHz)        | 400.13                                                                                                                                  | Nucleus                | <sup>1</sup> H       | Number of Transients 256       |
| Origin                 | NMR Roche Basel                                                                                                                         | Original Points Count  | 32768                | Owner serv                     |
| Points Count           | 32768                                                                                                                                   | Solvent                | DMSO-d6              | Spectrum Offset (Hz) 3997.6646 |
| Sweep Width (Hz)       | 8802.82                                                                                                                                 | Temperature (degree C) | 25.000               |                                |

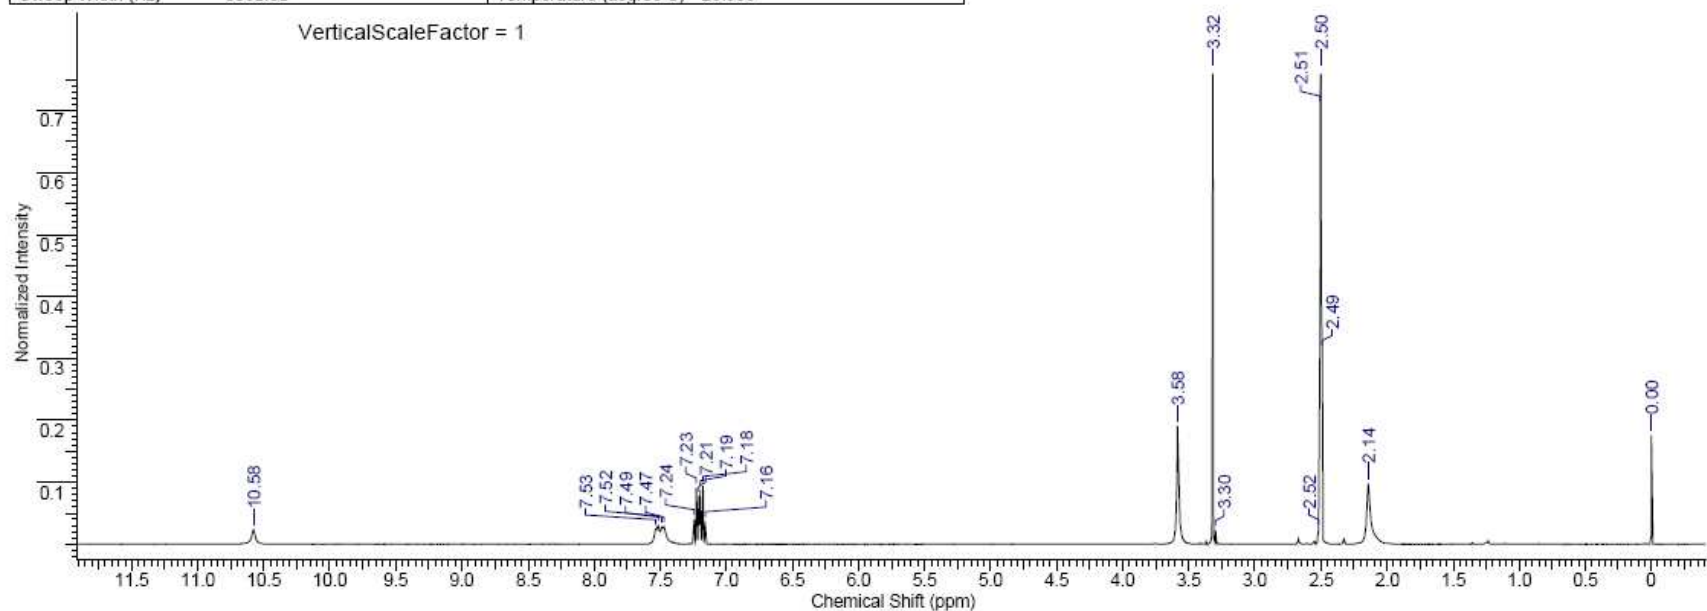

| (ppm) | (Hz)   | (ppm) | (Hz)   | (ppm) | (Hz)   |
|-------|--------|-------|--------|-------|--------|
| -0.00 | -0.2   | 3.58  | 1434.4 | 7.23  | 2891.2 |
| 2.14  | 856.8  | 7.16  | 2863.8 | 7.24  | 2897.4 |
| 2.49  | 997.0  | 7.16  | 2865.2 | 7.24  | 2898.5 |
| 2.50  | 998.9  | 7.18  | 2871.4 | 7.47  | 2989.3 |
| 2.50  | 1000.8 | 7.18  | 2872.7 | 7.49  | 2995.5 |
| 2.51  | 1002.6 | 7.19  | 2878.9 | 7.52  | 3007.6 |
| 2.51  | 1004.2 | 7.20  | 2880.2 | 7.53  | 3014.3 |
| 2.52  | 1007.7 | 7.20  | 2882.1 | 10.58 | 4231.8 |
| 3.30  | 1318.8 | 7.21  | 2883.7 |       |        |
| 3.32  | 1328.2 | 7.22  | 2889.9 |       |        |

| No | Color | Structure | Visible |
|----|-------|-----------|---------|
| 1  |       |           | True    |



3a = N-(1-Methyl-1H-benzoimidazol-2-yl)-acetamide in DMSO 80 degree C

|                        |                                                                                                                                         |                        |                      |                                |
|------------------------|-----------------------------------------------------------------------------------------------------------------------------------------|------------------------|----------------------|--------------------------------|
| Acquisition Time (sec) | 3.7224                                                                                                                                  |                        |                      |                                |
| Comment                | ARC= 2009000162265 Labjournal 24041B004 Labgroup ID mohrp Contact Person Name Stefan Buerli Contact Person Address 092/4.36A Theme 4652 |                        |                      |                                |
| Date                   | 21 Oct 2009 07:49:33                                                                                                                    | Date Stamp             | 21 Oct 2009 07:49:33 |                                |
| File Name              | C:\DOCUMENTS AND SETTINGS\MOHRP\LOCAL SETTINGS\TEMPORARY INTERNET FILES\CONTENT\IE5\2CZSS3VR\2009000162265_27[1].JDX                    |                        |                      |                                |
| Frequency (MHz)        | 400.13                                                                                                                                  | Nucleus                | 1H                   | Number of Transients 256       |
| Origin                 | NMR Roche Basel                                                                                                                         | Original Points Count  | 32768                | Owner serv                     |
| Points Count           | 32768                                                                                                                                   | Solvent                | DMSO-d6              | Spectrum Offset (Hz) 3990.9780 |
| Sweep Width (Hz)       | 8802.82                                                                                                                                 | Temperature (degree C) | 80.000               |                                |

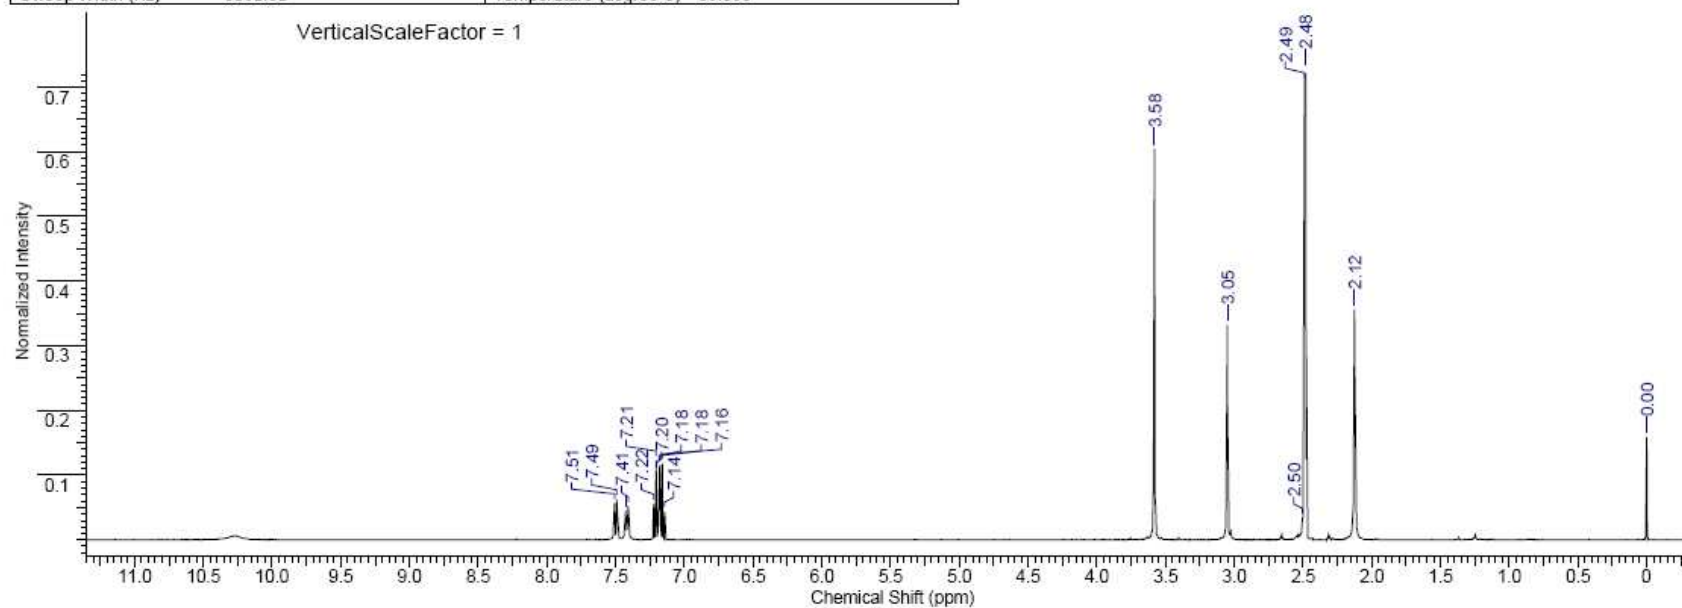

| (ppm) | (Hz)   | (ppm) | (Hz)   | (ppm) | (Hz)   |
|-------|--------|-------|--------|-------|--------|
| -0.00 | -0.2   | 3.05  | 1220.3 | 7.20  | 2882.1 |
| 2.12  | 849.8  | 3.58  | 1432.5 | 7.21  | 2883.5 |
| 2.47  | 990.0  | 7.14  | 2857.1 | 7.22  | 2889.4 |
| 2.48  | 991.9  | 7.14  | 2858.5 | 7.22  | 2890.7 |
| 2.48  | 993.8  | 7.16  | 2864.4 | 7.41  | 2964.3 |
| 2.49  | 995.7  | 7.16  | 2865.7 | 7.43  | 2971.9 |
| 2.49  | 997.6  | 7.18  | 2871.9 | 7.49  | 2997.4 |
| 2.50  | 1000.8 | 7.18  | 2873.5 | 7.51  | 3004.6 |
| 2.51  | 1002.7 | 7.19  | 2876.0 |       |        |

| No | Color | Structure | Visible |
|----|-------|-----------|---------|
| 1  |       |           | True    |



**<sup>13</sup>C-NMR:** most peaks not visible due to very strong line broadening

3a = N-(1-Methyl-1H-benzimidazol-2-yl)-acetamide in CDCl<sub>3</sub> at ambient temperature

|                        |                                                                                                                                         |                        |                      |
|------------------------|-----------------------------------------------------------------------------------------------------------------------------------------|------------------------|----------------------|
| Acquisition Time (sec) | 3.6351                                                                                                                                  |                        |                      |
| Comment                | ARC= 2009000162265 Labjournal 24041B004 Labgroup ID mohrp Contact Person Name Stefan Buerli Contact Person Address 092/4.36A Theme 4652 |                        |                      |
| Date                   | 13 Oct 2009 03:10:59                                                                                                                    | Date Stamp             | 13 Oct 2009 03:10:59 |
| File Name              | C:\DOCUMENTS AND SETTINGS\MOHRP\LOCAL SETTINGS\TEMPORARY INTERNET FILES\CONTENT.IE5\MT92FAHG\2009000162265_3013\11.JDX                  |                        |                      |
| Frequency (MHz)        | 150.92                                                                                                                                  | Nucleus                | <sup>13</sup> C      |
| Origin                 | NMR Roche Basel                                                                                                                         | Original Points Count  | 131072               |
| Points Count           | 131072                                                                                                                                  | Solvent                | CHLOROFORM-d         |
| Sweep Width (Hz)       | 36057.42                                                                                                                                | Temperature (degree C) | 25.027               |
|                        |                                                                                                                                         | Number of Transients   | 4048                 |
|                        |                                                                                                                                         | Owner                  | serv                 |
|                        |                                                                                                                                         | Spectrum Offset (Hz)   | 16603.8066           |

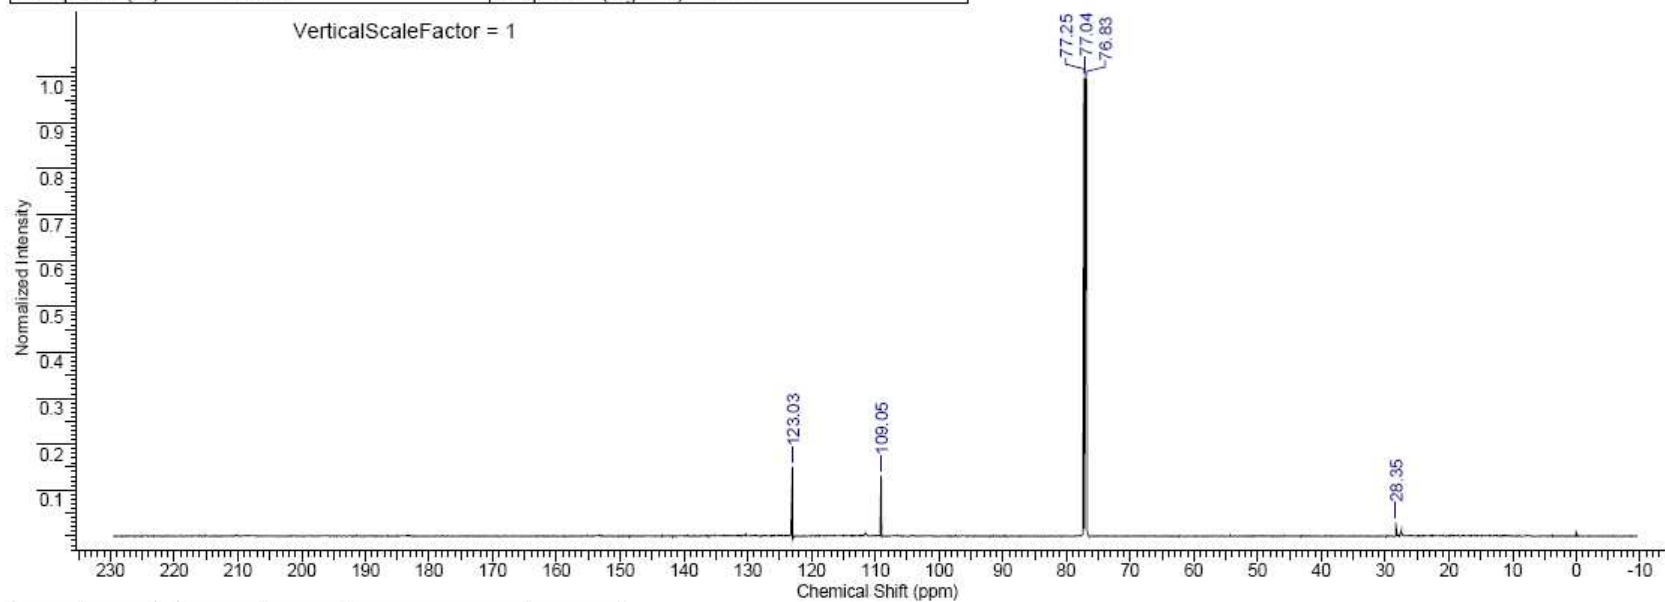

| (ppm)  | (Hz)    | No | Color | Structure | Visible |
|--------|---------|----|-------|-----------|---------|
| 28.35  | 4278.2  | 1  |       |           | True    |
| 76.83  | 11594.7 |    |       |           |         |
| 77.04  | 11626.6 |    |       |           |         |
| 77.25  | 11658.5 |    |       |           |         |
| 109.05 | 16458.4 |    |       |           |         |
| 123.02 | 18565.4 |    |       |           |         |
| 123.03 | 18567.3 |    |       |           |         |

### **3b] *N*-(1*H*-Benzoimidazol-2-yl)-acetamide**

1*H*-Benzoimidazol-2-ylamine (266 mg, 2.00 mmol) was treated with 10 ml of acetic anhydride and stirred for 4 h at ambient temperature. The initially heterogeneous solution became gradually homogeneous, before a solid started precipitating. TLC indicated then complete disappearance of starting material. The reaction mixture was heated to reflux for 30 minutes. Cooling, pouring onto crashed ice, twofold extraction with ethyl acetate, washing with water, drying over Na<sub>2</sub>SO<sub>4</sub>, and evaporation of all solvents, followed by flash chromatography (SiO<sub>2</sub>, gradient CH<sub>2</sub>Cl<sub>2</sub> to CH<sub>2</sub>Cl<sub>2</sub> / MeOH = 92 / 8) and ensuing crystallization from heptane / ethyl acetate afforded 25 mg of the title compound as off-white crystals. The diacetate in the less polar fractions was discarded.

MS: C<sub>9</sub>H<sub>9</sub>N<sub>3</sub>O, expected: 175.075, found: 175.074.

IR:

### 3b = N-(1H-Benzoimidazol-2-yl)-acetamide

17 Dec 2009

|              |                                                                                                                               |        |                       |                |                      |
|--------------|-------------------------------------------------------------------------------------------------------------------------------|--------|-----------------------|----------------|----------------------|
| Title        | *E091110.102 23923-B032                                                                                                       | Origin | Hoffmann-La Roche Ltd | Owner          | Nicolet              |
| File Name    | C:\DOCUMENTS AND SETTINGS\MOHRP\LOCAL SETTINGS\TEMPORARY INTERNET FILES\CONTENT.IE5\BAZDHLFF\2009000167531-E091110-102[1].JDX |        |                       |                |                      |
| Date Stamp   | 08:49:42                                                                                                                      | Date   | 17 Dec 2009 15:36:04  | Technique      | Infrared             |
| X Axis       | Wavenumber (cm-1)                                                                                                             | Y Axis | Transmittance         | Spectrum Range | 519.7302 - 3999.7058 |
| Data Spacing | 0.9642                                                                                                                        |        |                       | Points Count   | 3610                 |

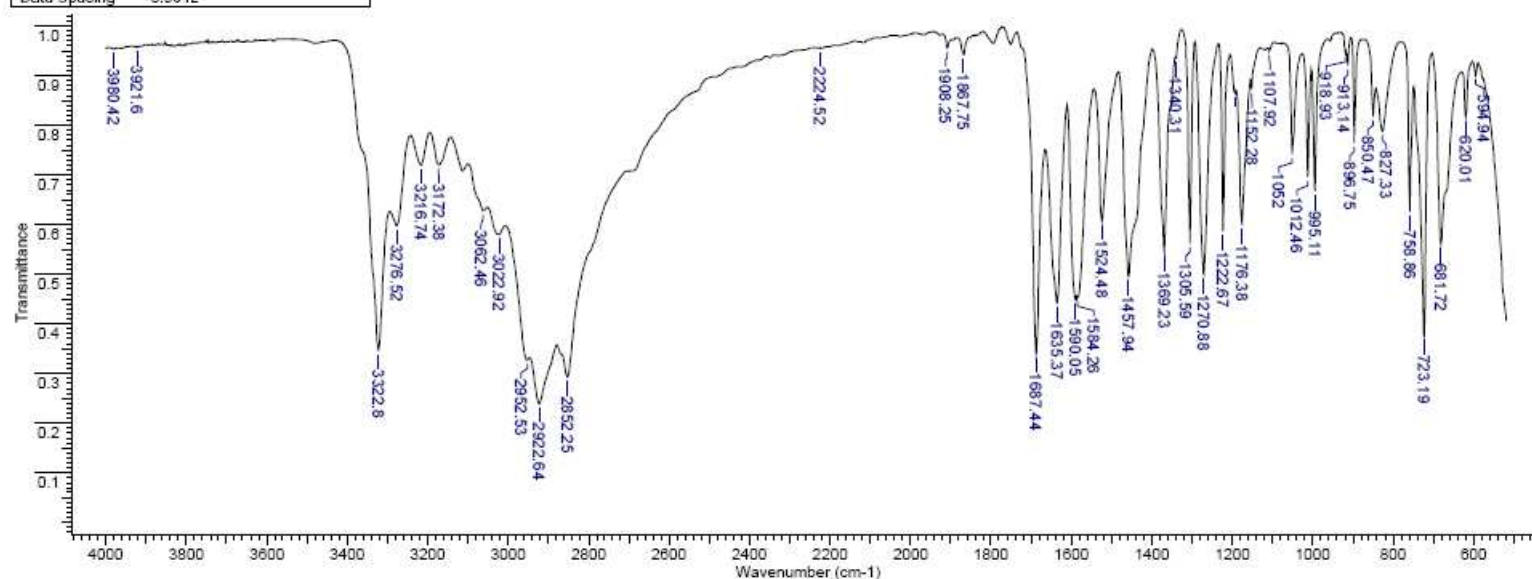

| No | cm-1   | T     | Intensity | No | cm-1    | T     | Intensity | No | cm-1    | T     | Intensity | No | cm-1    | T     | Intensity |
|----|--------|-------|-----------|----|---------|-------|-----------|----|---------|-------|-----------|----|---------|-------|-----------|
| 1  | 594.94 | 0.900 | W         | 12 | 1012.46 | 0.695 | M         | 23 | 1457.94 | 0.495 | S         | 34 | 2952.53 | 0.327 | S         |
| 2  | 620.01 | 0.816 | W         | 13 | 1052.00 | 0.741 | M         | 24 | 1524.48 | 0.606 | M         | 35 | 3022.92 | 0.580 | M         |
| 3  | 681.72 | 0.581 | M         | 14 | 1107.92 | 0.949 | VW        | 25 | 1584.26 | 0.453 | S         | 36 | 3062.46 | 0.627 | M         |
| 4  | 723.19 | 0.376 | S         | 15 | 1152.28 | 0.872 | W         | 26 | 1590.05 | 0.448 | S         | 37 | 3172.38 | 0.720 | M         |
| 5  | 758.86 | 0.625 | M         | 16 | 1176.38 | 0.599 | M         | 27 | 1635.37 | 0.441 | S         | 38 | 3216.74 | 0.720 | M         |
| 6  | 827.33 | 0.788 | W         | 17 | 1193.74 | 0.865 | W         | 28 | 1687.44 | 0.338 | S         | 39 | 3276.52 | 0.597 | M         |
| 7  | 850.47 | 0.818 | W         | 18 | 1222.67 | 0.586 | M         | 29 | 1867.75 | 0.942 | VW        | 40 | 3322.80 | 0.346 | S         |
| 8  | 896.75 | 0.765 | M         | 19 | 1270.88 | 0.498 | S         | 30 | 1908.25 | 0.956 | VW        | 41 | 3921.60 | 0.957 | VW        |
| 9  | 913.14 | 0.921 | W         | 20 | 1305.59 | 0.563 | M         | 31 | 2224.52 | 0.955 | VW        | 42 | 3980.42 | 0.954 | VW        |
| 10 | 918.93 | 0.945 | VW        | 21 | 1340.31 | 0.935 | VW        | 32 | 2852.25 | 0.293 | VS        |    |         |       |           |
| 11 | 995.11 | 0.686 | M         | 22 | 1369.23 | 0.544 | M         | 33 | 2922.64 | 0.239 | VS        |    |         |       |           |

# **<sup>1</sup>H-NMR:**

3b = N-(1H-Benzoimidazol-2-yl)-acetamide

|                        |                                                                                                                                       |                        |                      |                      |           |
|------------------------|---------------------------------------------------------------------------------------------------------------------------------------|------------------------|----------------------|----------------------|-----------|
| Acquisition Time (sec) | 3.7224                                                                                                                                |                        |                      |                      |           |
| Comment                | ARC= 2009000166479 Labjournal 23925.B032 Labgroup ID mohrp Contact Person Name Peter Mohr Contact Person Address 092/4.30C Theme 4652 |                        |                      |                      |           |
| Date                   | 28 Oct 2009 07:50:05                                                                                                                  | Date Stamp             | 28 Oct 2009 07:50:05 |                      |           |
| File Name              | C:\DOCUMENTS AND SETTINGS\MOHRP\LOCAL SETTINGS\TEMPORARY INTERNET FILES\CONTENT.IE5\RUC7ZL0X\2009000166479_10[1].JDX                  |                        |                      |                      |           |
| Frequency (MHz)        | 400.13                                                                                                                                | Nucleus                | <sup>1</sup> H       | Number of Transients | 30        |
| Origin                 | NMR Roche Basel                                                                                                                       | Original Points Count  | 32768                | Owner                | serv      |
| Points Count           | 32768                                                                                                                                 | Solvent                | DMSO-d6              | Spectrum Offset (Hz) | 3997.7241 |
| Sweep Width (Hz)       | 8802.82                                                                                                                               | Temperature (degree C) | 25.000               |                      |           |

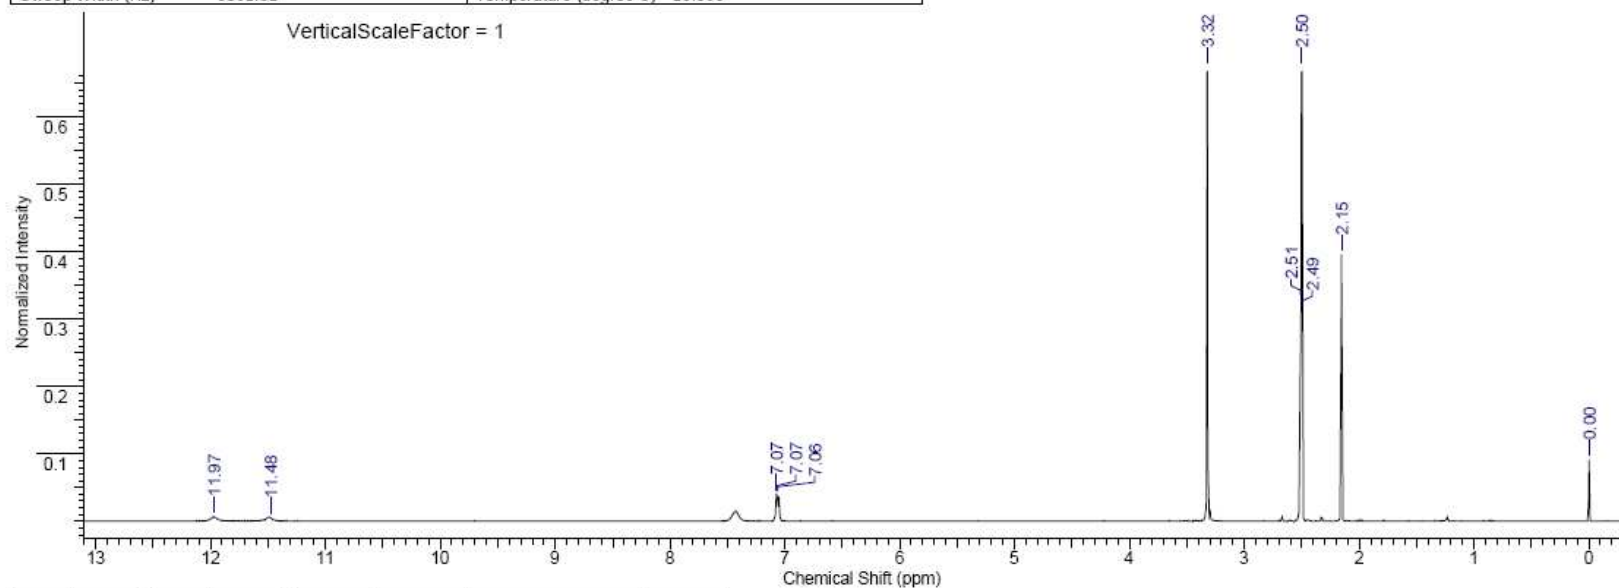

| (ppm) | (Hz)   | (ppm) | (Hz)   | No | Color | Structure | Visible |
|-------|--------|-------|--------|----|-------|-----------|---------|
| -0.00 | -0.2   | 3.32  | 1328.6 | 1  |       |           | True    |
| 2.15  | 861.9  | 7.05  | 2821.7 |    |       |           |         |
| 2.49  | 997.1  | 7.06  | 2824.7 |    |       |           |         |
| 2.50  | 998.9  | 7.07  | 2827.9 |    |       |           |         |
| 2.50  | 1000.8 | 7.07  | 2830.8 |    |       |           |         |
| 2.51  | 1002.7 | 11.48 | 4593.2 |    |       |           |         |
| 2.51  | 1004.3 | 11.97 | 4790.6 |    |       |           |         |

**<sup>13</sup>C-NMR:** some peaks not visible due to very strong line broadening

3b = N-(1H-Benzoimidazol-2-yl)-acetamide

|                        |                                                                                                                                       |                        |                      |                      |            |
|------------------------|---------------------------------------------------------------------------------------------------------------------------------------|------------------------|----------------------|----------------------|------------|
| Acquisition Time (sec) | 3.6351                                                                                                                                |                        |                      |                      |            |
| Comment                | ARC= 2009000166479 Labjournal 23925.B032 Labgroup ID mohrp Contact Person Name Peter Mohr Contact Person Address 092/4.30C Theme 4652 |                        |                      |                      |            |
| Date                   | 26 Oct 2009 12:34:55                                                                                                                  | Date Stamp             | 26 Oct 2009 12:34:55 |                      |            |
| File Name              | C:\DOCUMENTS AND SETTINGS\MOHRP\LOCAL SETTINGS\TEMPORARY INTERNET FILES\CONTENT\IE5\OLS5AZO5\2009000166479_2004\11.JDX                |                        |                      |                      |            |
| Frequency (MHz)        | 150.92                                                                                                                                | Nucleus                | <sup>13</sup> C      | Number of Transients | 1024       |
| Origin                 | NMR Roche Basel                                                                                                                       | Original Points Count  | 131072               | Owner                | serv       |
| Points Count           | 131072                                                                                                                                | Solvent                | DMSO-d6              | Spectrum Offset (Hz) | 16515.2637 |
| Sweep Width (Hz)       | 36057.42                                                                                                                              | Temperature (degree C) | 25.027               |                      |            |

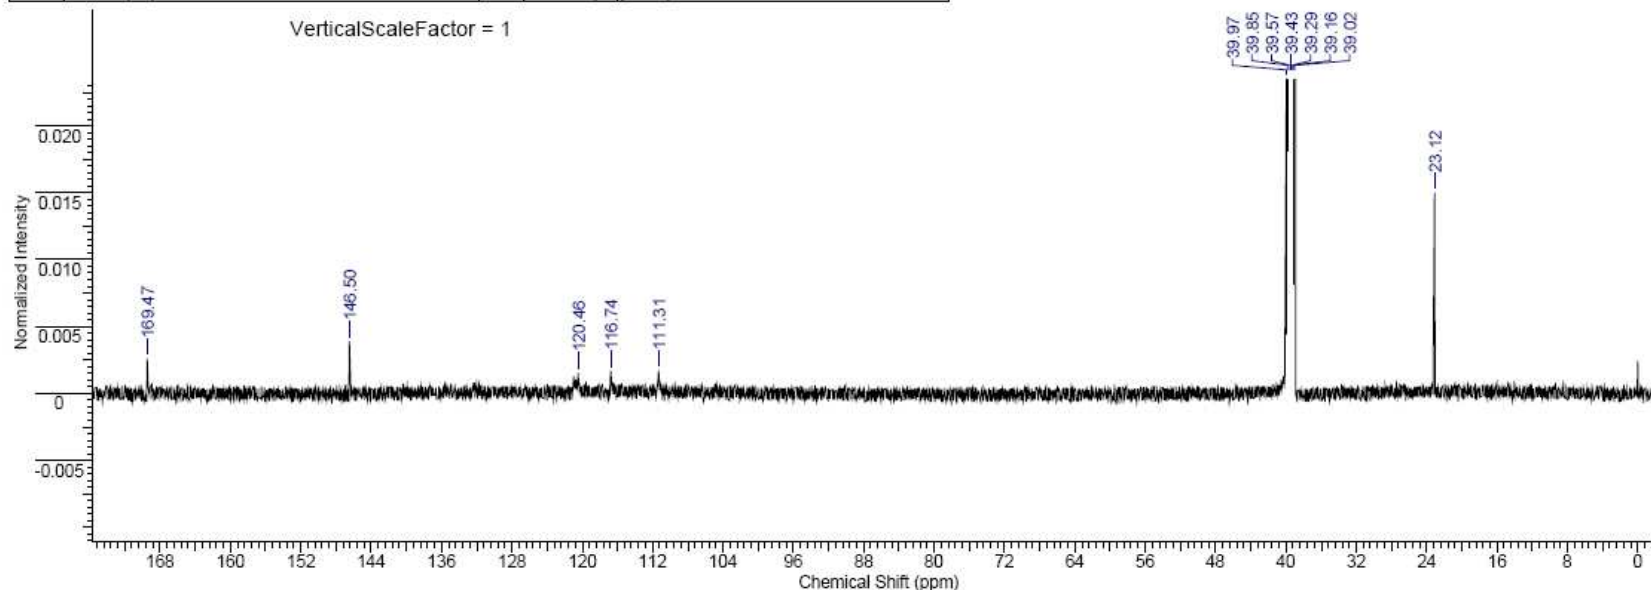

| (ppm) | (Hz)   | (ppm)  | (Hz)    | No | Color | Structure | Visible |
|-------|--------|--------|---------|----|-------|-----------|---------|
| 23.12 | 3489.2 | 39.85  | 6014.1  | 1  |       |           | True    |
| 39.02 | 5888.4 | 39.97  | 6032.2  |    |       |           |         |
| 39.16 | 5909.3 | 111.31 | 16798.8 |    |       |           |         |
| 39.29 | 5930.2 | 116.74 | 17618.3 |    |       |           |         |
| 39.43 | 5951.3 | 120.46 | 18179.5 |    |       |           |         |
| 39.57 | 5972.3 | 146.50 | 22109.5 |    |       |           |         |
| 39.71 | 5993.2 | 169.47 | 25576.9 |    |       |           |         |

#### **4a] *N*-(1-Methyl-1*H*-benzoimidazol-2-ylmethyl)-acetamide**

*N*-(1-Methyl-1*H*-benzoimidazol-2-yl)-methanamine (229 mg, 1.42 mmol) was dissolved in 4.5 ml of CH<sub>2</sub>Cl<sub>2</sub> and successively treated at -10°C with 126 µl (1.56 mmol, 1.1 eq.) of pyridine and 106 µl (1.49 mmol, 1.05 eq.) of acetyl chloride. The reaction mixture was kept overnight at ambient temperature. Pouring onto crushed ice / ammonium chloride / ethyl acetate, additional extraction with ethyl acetate, washing with water, drying over MgSO<sub>4</sub>, and evaporation of all solvents, followed by flash chromatography (SiO<sub>2</sub>, CH<sub>2</sub>Cl<sub>2</sub> / MeOH = 92 / 8) and ensuing crystallization from hexane / ethyl acetate yielded 54 mg of the title compound as white crystals.

**MS:** C<sub>11</sub>H<sub>13</sub>N<sub>3</sub>O, expected: 204.11314, found: 204.11304.

**IR:**

4a = N-(1-Methyl-1H-benzoimidazol-2-ylmethyl)-acetamide

17 Dec 2009

|              |                                                                                                                                 |        |                       |                |                      |
|--------------|---------------------------------------------------------------------------------------------------------------------------------|--------|-----------------------|----------------|----------------------|
| Title        | *E091027.101 240418046                                                                                                          | Origin | Hoffmann-La Roche Ltd | Owner          | Nicolet              |
| File Name    | C:\DOCUMENTS AND SETTINGS\MOHRP\LOCAL SETTINGS\TEMPORARY INTERNET FILES\CONTENT\IE5\RXKD\EEBG\20090000166621-E091027-101(1).JDX |        |                       |                |                      |
| Date Stamp   | 07:26:46                                                                                                                        | Date   | 17 Dec 2009 15:39:46  | Technique      | Infrared             |
| X Axis       | Wavenumber (cm-1)                                                                                                               | Y Axis | Transmittance         | Spectrum Range | 519.7302 - 3999.7058 |
| Data Spacing | 0.9642                                                                                                                          |        |                       | Points Count   | 3610                 |

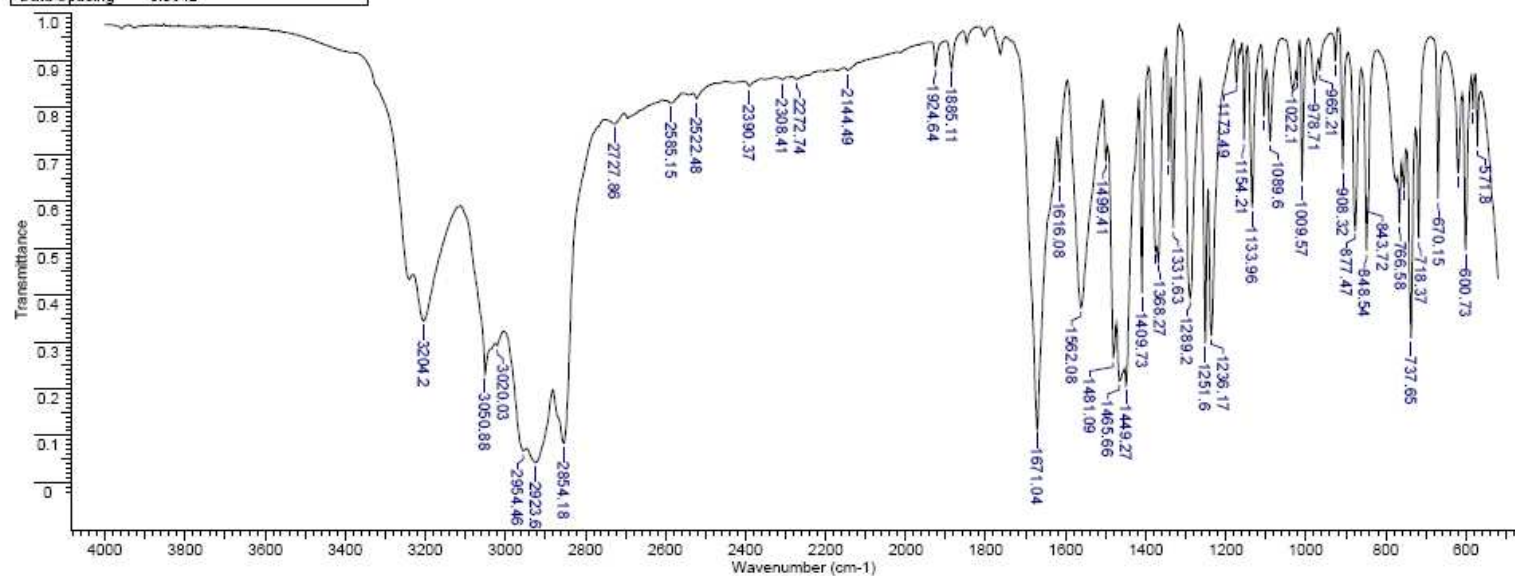

| No | cm-1   | T     | Intensity | No | cm-1    | T     | Intensity | No | cm-1    | T     | Intensity | No | cm-1    | T     | Intensity |
|----|--------|-------|-----------|----|---------|-------|-----------|----|---------|-------|-----------|----|---------|-------|-----------|
| 1  | 571.80 | 0.717 | W         | 15 | 985.21  | 0.878 | W         | 29 | 1368.27 | 0.471 | M         | 43 | 2308.41 | 0.859 | W         |
| 2  | 582.41 | 0.795 | W         | 16 | 978.71  | 0.849 | W         | 30 | 1375.98 | 0.495 | M         | 44 | 2390.37 | 0.848 | W         |
| 3  | 600.73 | 0.495 | M         | 17 | 1009.67 | 0.642 | M         | 31 | 1400.73 | 0.404 | S         | 45 | 2522.48 | 0.818 | W         |
| 4  | 620.01 | 0.659 | M         | 18 | 1022.10 | 0.861 | W         | 32 | 1449.27 | 0.207 | S         | 46 | 2585.15 | 0.809 | W         |
| 5  | 670.15 | 0.605 | M         | 19 | 1089.60 | 0.727 | W         | 33 | 1465.68 | 0.217 | S         | 47 | 2727.86 | 0.765 | W         |
| 6  | 718.37 | 0.521 | M         | 20 | 1105.03 | 0.781 | W         | 34 | 1481.09 | 0.285 | S         | 48 | 2854.18 | 0.084 | VS        |
| 7  | 737.65 | 0.308 | S         | 21 | 1133.96 | 0.586 | M         | 35 | 1499.41 | 0.687 | M         | 49 | 2923.80 | 0.042 | VS        |
| 8  | 755.01 | 0.631 | M         | 22 | 1154.21 | 0.731 | W         | 36 | 1562.08 | 0.372 | S         | 50 | 2954.46 | 0.068 | VS        |
| 9  | 766.58 | 0.553 | M         | 23 | 1173.49 | 0.854 | W         | 37 | 1616.08 | 0.639 | M         | 51 | 3020.03 | 0.292 | S         |
| 10 | 843.72 | 0.596 | M         | 24 | 1236.17 | 0.313 | S         | 38 | 1671.04 | 0.114 | VS        | 52 | 3050.88 | 0.230 | S         |
| 11 | 848.54 | 0.494 | M         | 25 | 1251.60 | 0.296 | S         | 39 | 1685.11 | 0.893 | W         |    |         |       |           |
| 12 | 877.47 | 0.538 | M         | 26 | 1289.20 | 0.394 | S         | 40 | 1924.64 | 0.889 | VW        |    |         |       |           |
| 13 | 908.32 | 0.668 | M         | 27 | 1331.63 | 0.543 | M         | 41 | 2144.49 | 0.879 | W         |    |         |       |           |
| 14 | 926.64 | 0.898 | VW        | 28 | 1343.20 | 0.684 | M         | 42 | 2272.74 | 0.880 | W         |    |         |       |           |



# **<sup>1</sup>H-NMR:**

## **4a = N-(1-Methyl-1H-benzimidazol-2-ylmethyl)-acetamide**

|                        |                                                                                                                                         |                        |                      |                      |           |
|------------------------|-----------------------------------------------------------------------------------------------------------------------------------------|------------------------|----------------------|----------------------|-----------|
| Acquisition Time (sec) | 9.9266                                                                                                                                  |                        |                      |                      |           |
| Comment                | ARC= 2009000166621 Labjournal 24041B046 Labgroup ID mohrp Contact Person Name Stefan Buerli Contact Person Address 092/4.36A Theme 4652 |                        |                      |                      |           |
| Date                   | 26 Oct 2009 15:28:25                                                                                                                    | Date Stamp             | 26 Oct 2009 15:28:25 |                      |           |
| File Name              | C:\DOCUMENTS AND SETTINGS\MOHRP\LOCAL SETTINGS\TEMPORARY INTERNET FILES\CONTENT\IE5\PDRT2U0E\2009000166621_1000f11.JDX                  |                        |                      |                      |           |
| Frequency (MHz)        | 600.14                                                                                                                                  | Nucleus                | <sup>1</sup> H       | Number of Transients | 8         |
| Origin                 | NMR Roche Basel                                                                                                                         | Original Points Count  | 131072               | Owner                | serv      |
| Points Count           | 131072                                                                                                                                  | Solvent                | CHLOROFORM-d         | Spectrum Offset (Hz) | 5690.6846 |
| Sweep Width (Hz)       | 13204.13                                                                                                                                | Temperature (degree C) | 25.027               |                      |           |

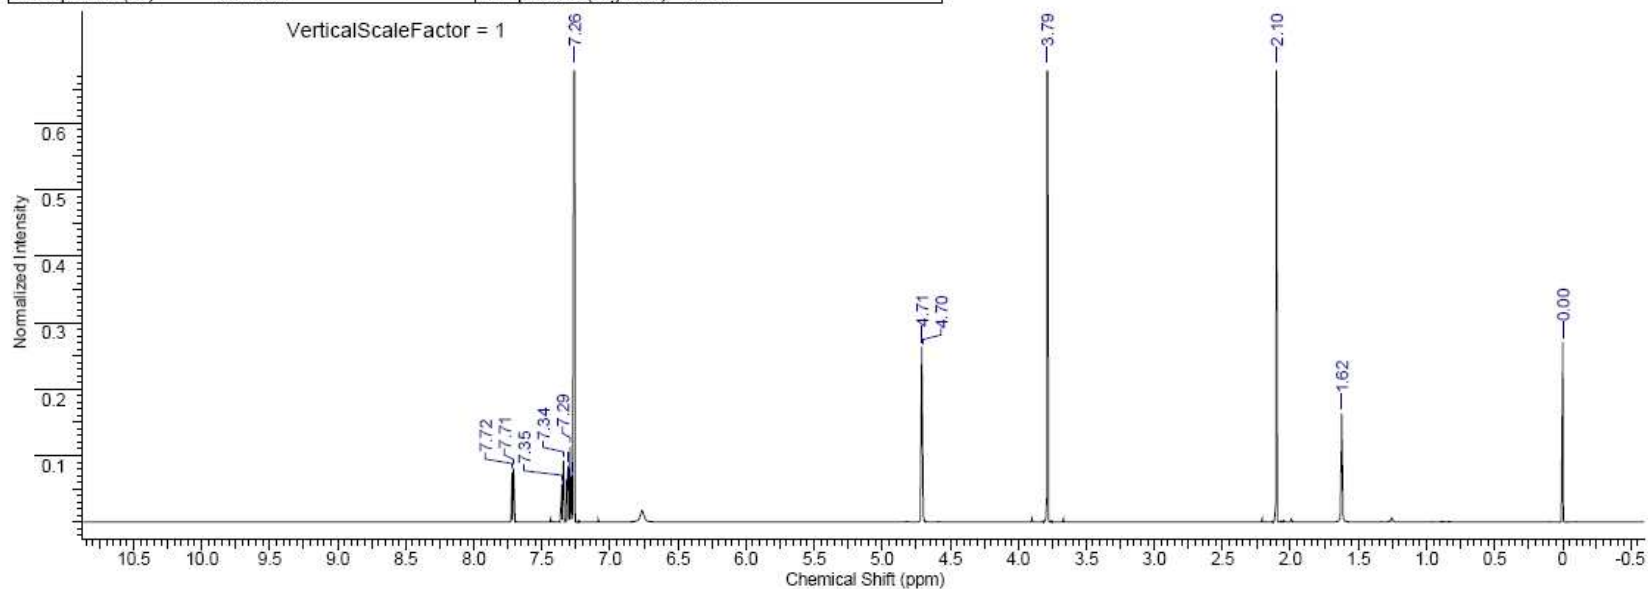

| (ppm) | (Hz)   | (ppm) | (Hz)   | (ppm) | (Hz)   |
|-------|--------|-------|--------|-------|--------|
| 0.00  | 0.1    | 7.28  | 4367.5 | 7.34  | 4406.1 |
| 1.62  | 974.3  | 7.28  | 4368.8 | 7.34  | 4407.3 |
| 2.10  | 1262.4 | 7.29  | 4374.9 | 7.35  | 4413.2 |
| 3.79  | 2272.4 | 7.29  | 4376.6 | 7.36  | 4414.8 |
| 4.70  | 2821.2 | 7.30  | 4378.2 | 7.71  | 4624.2 |
| 4.71  | 2826.2 | 7.31  | 4384.4 | 7.71  | 4625.5 |
| 7.26  | 4357.8 | 7.31  | 4385.7 | 7.72  | 4632.7 |
| 7.27  | 4360.2 | 7.32  | 4391.6 |       |        |
| 7.27  | 4361.7 | 7.32  | 4392.8 |       |        |

| No | Color | Structure | Visible |
|----|-------|-----------|---------|
| 1  |       |           | True    |

# **<sup>13</sup>C-NMR:**

4a = N-(1-Methyl-1H-benzoimidazol-2-ylmethyl)-acetamide

|                        |                                                                                                                                         |                        |                      |                      |            |
|------------------------|-----------------------------------------------------------------------------------------------------------------------------------------|------------------------|----------------------|----------------------|------------|
| Acquisition Time (sec) | 3.6351                                                                                                                                  |                        |                      |                      |            |
| Comment                | ARC= 2009000166621 Labjournal 240418046 Labgroup ID mohrp Contact Person Name Stefan Buerli Contact Person Address 092/4.36A Theme 4652 |                        |                      |                      |            |
| Date                   | 26 Oct 2009 15:51:42                                                                                                                    | Date Stamp             | 26 Oct 2009 15:51:42 |                      |            |
| File Name              | C:\DOCUMENTS AND SETTINGS\MOHRP\LOCAL SETTINGS\TEMPORARY INTERNET FILES\CONTENT\IE5\YJU36DM3\2009000166621_1002[1].JDX                  |                        |                      |                      |            |
| Frequency (MHz)        | 150.92                                                                                                                                  | Nucleus                | <sup>13</sup> C      | Number of Transients | 512        |
| Origin                 | NMR Roche Basel                                                                                                                         | Original Points Count  | 131072               | Owner                | serv       |
| Points Count           | 131072                                                                                                                                  | Solvent                | CHLOROFORM-d         | Spectrum Offset (Hz) | 16603.5645 |
| Sweep Width (Hz)       | 36057.42                                                                                                                                | Temperature (degree C) | 25.027               |                      |            |

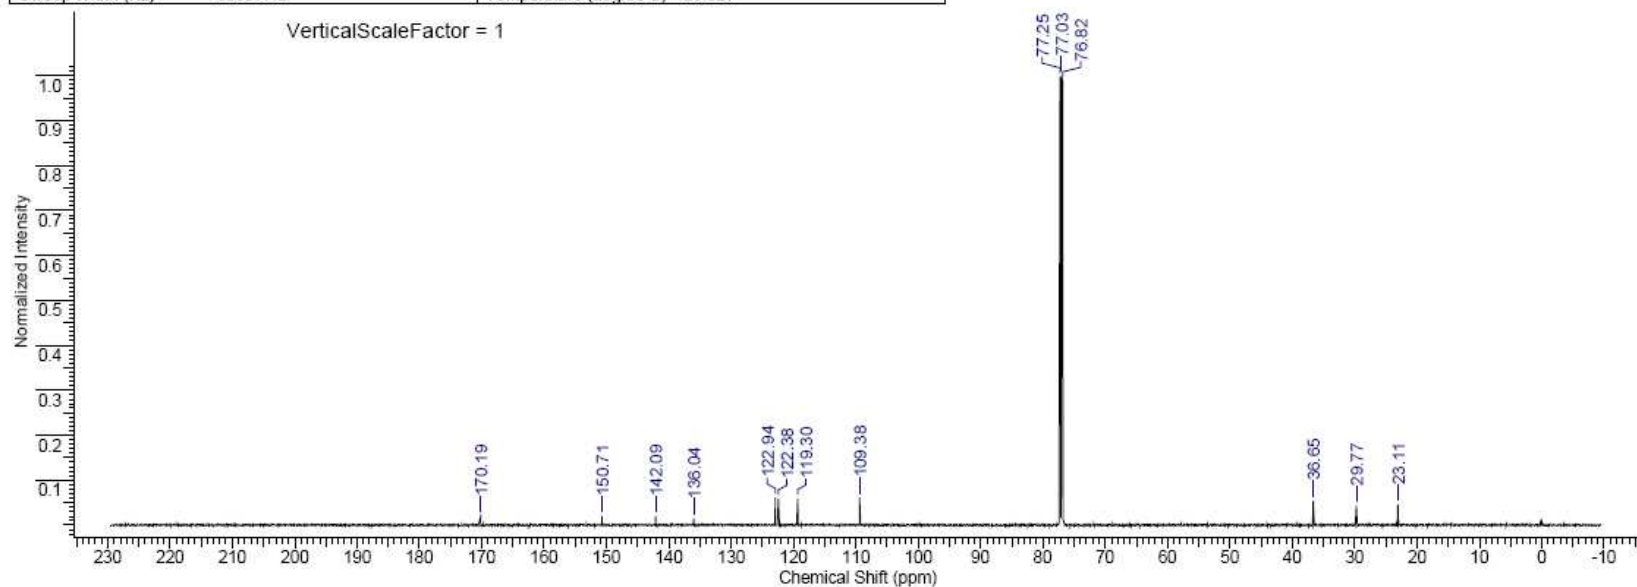

| (ppm)  | (Hz)    | (ppm)  | (Hz)    | No | Color | Structure | Visible |
|--------|---------|--------|---------|----|-------|-----------|---------|
| 23.11  | 3488.1  | 119.30 | 18004.8 | 1  |       |           | True    |
| 29.77  | 4493.0  | 122.38 | 18470.2 |    |       |           |         |
| 36.65  | 5531.3  | 122.94 | 18553.9 |    |       |           |         |
| 76.82  | 11594.2 | 136.04 | 20531.0 |    |       |           |         |
| 77.03  | 11626.1 | 142.09 | 21444.3 |    |       |           |         |
| 77.25  | 11658.0 | 150.71 | 22745.3 |    |       |           |         |
| 109.38 | 16508.0 | 170.19 | 25685.0 |    |       |           |         |

#### 4b] *N*-(1*H*-Benzoimidazol-2-ylmethyl)-acetamide

Was bought from Princeton.

**MS:** C<sub>10</sub>H<sub>11</sub>N<sub>3</sub>O, expected: 190.09749, found: 190.09740 (M+H)<sup>+</sup>.

**IR:**

4b = *N*-(1*H*-Benzoimidazol-2-ylmethyl)-acetamide

17 Dec 2009

|              |                                                                                                                               |        |                       |                |                      |
|--------------|-------------------------------------------------------------------------------------------------------------------------------|--------|-----------------------|----------------|----------------------|
| Title        | *E090916.105 24041B027                                                                                                        | Origin | Hoffmann-La Roche Ltd | Owner          | Nicolet              |
| File Name    | C:\DOCUMENTS AND SETTINGS\MOHRP\LOCAL SETTINGS\TEMPORARY INTERNET FILES\CONTENT.IE5\2CZ5S3VR\2009000164378-E090916-105[1].JDX |        |                       |                |                      |
| Date Stamp   | 07:57:57                                                                                                                      | Date   | 17 Dec 2009 15:41:48  | Technique      | Infrared             |
| X Axis       | Wavenumber (cm-1)                                                                                                             | Y Axis | Transmittance         | Spectrum Range | 519.7302 - 3999.7058 |
| Data Spacing | 0.9642                                                                                                                        |        |                       | Points Count   | 3610                 |

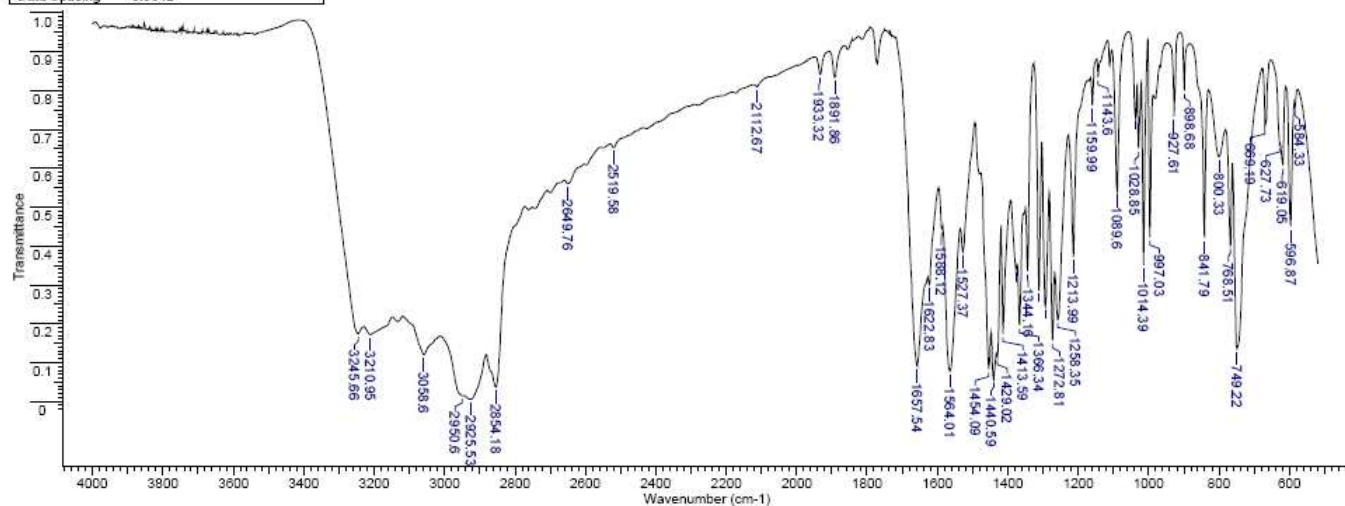

| No | cm-1   | T     | Intensity | No | cm-1    | T     | Intensity | No | cm-1    | T     | Intensity | No | cm-1    | T     | Intensity |
|----|--------|-------|-----------|----|---------|-------|-----------|----|---------|-------|-----------|----|---------|-------|-----------|
| 1  | 584.33 | 0.754 | W         | 13 | 1014.39 | 0.350 | S         | 25 | 1368.34 | 0.196 | S         | 37 | 1933.32 | 0.842 | W         |
| 2  | 596.87 | 0.450 | M         | 14 | 1028.85 | 0.651 | M         | 26 | 1378.95 | 0.339 | S         | 38 | 2112.87 | 0.810 | W         |
| 3  | 619.05 | 0.608 | M         | 15 | 1037.53 | 0.730 | W         | 27 | 1413.59 | 0.173 | S         | 39 | 2519.58 | 0.852 | M         |
| 4  | 627.73 | 0.661 | M         | 16 | 1089.60 | 0.543 | M         | 28 | 1429.02 | 0.114 | S         | 40 | 2649.76 | 0.560 | M         |
| 5  | 669.19 | 0.708 | W         | 17 | 1143.60 | 0.834 | W         | 29 | 1440.59 | 0.056 | VS        | 41 | 2854.18 | 0.037 | VS        |
| 6  | 749.22 | 0.135 | S         | 18 | 1159.99 | 0.762 | W         | 30 | 1454.09 | 0.083 | VS        | 42 | 2925.53 | 0.005 | VS        |
| 7  | 768.51 | 0.400 | M         | 19 | 1213.99 | 0.372 | S         | 31 | 1527.37 | 0.385 | S         | 43 | 2950.60 | 0.015 | VS        |
| 8  | 800.33 | 0.629 | M         | 20 | 1258.35 | 0.209 | S         | 32 | 1564.01 | 0.078 | VS        | 44 | 3058.60 | 0.119 | S         |
| 9  | 841.79 | 0.421 | M         | 21 | 1272.81 | 0.157 | S         | 33 | 1588.12 | 0.443 | M         | 45 | 3210.95 | 0.172 | S         |
| 10 | 898.68 | 0.800 | W         | 22 | 1293.06 | 0.244 | S         | 34 | 1622.83 | 0.301 | S         | 46 | 3245.66 | 0.174 | S         |
| 11 | 927.61 | 0.733 | W         | 23 | 1311.38 | 0.287 | S         | 35 | 1667.54 | 0.091 | VS        |    |         |       |           |
| 12 | 997.03 | 0.423 | M         | 24 | 1344.16 | 0.335 | S         | 36 | 1891.86 | 0.833 | W         |    |         |       |           |

# **<sup>1</sup>H-NMR:**

4b = N-(1H-Benzoimidazol-2-ylmethyl)-acetamide

|                        |                                                                                                                                         |                        |                      |                      |           |
|------------------------|-----------------------------------------------------------------------------------------------------------------------------------------|------------------------|----------------------|----------------------|-----------|
| Acquisition Time (sec) | 9.9266                                                                                                                                  |                        |                      |                      |           |
| Comment                | ARC= 2009000164378 Labjournal 24041B027 Labgroup ID mohrp Contact Person Name Stefan Buerli Contact Person Address 092/4.36A Theme 4652 |                        |                      |                      |           |
| Date                   | 16 Sep 2009 08:35:02                                                                                                                    | Date Stamp             | 16 Sep 2009 08:35:02 |                      |           |
| File Name              | C:\DOCUMENTS AND SETTINGS\MOHRP\LOCAL SETTINGS\TEMPORARY INTERNET FILES\CONTENT\IE5\M14NAXY5\2009000164378_1000[1].JDX                  |                        |                      |                      |           |
| Frequency (MHz)        | 600.14                                                                                                                                  | Nucleus                | <sup>1</sup> H       | Number of Transients | 8         |
| Origin                 | NMR_Roche_Basel                                                                                                                         | Original Points Count  | 131072               | Owner                | serv      |
| Points Count           | 131072                                                                                                                                  | Solvent                | CHLOROFORM-d         | Spectrum Offset (Hz) | 5701.4033 |
| Sweep Width (Hz)       | 13204.13                                                                                                                                | Temperature (degree C) | 25.027               |                      |           |

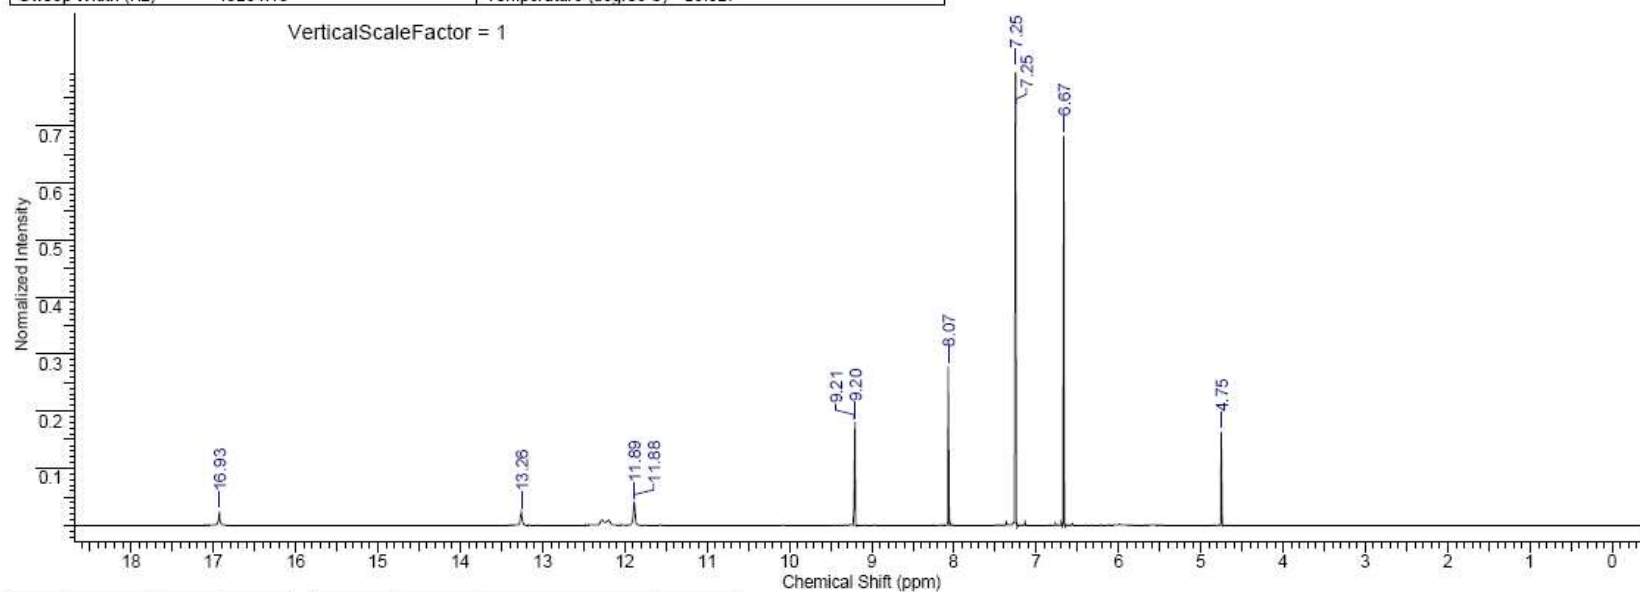

| (ppm) | (Hz)   | (ppm) | (Hz)    |
|-------|--------|-------|---------|
| 4.75  | 2852.0 | 8.07  | 4845.0  |
| 6.67  | 4001.1 | 9.20  | 5524.2  |
| 7.25  | 4349.2 | 9.21  | 5529.8  |
| 7.25  | 4351.0 | 11.88 | 7131.4  |
| 7.25  | 4352.8 | 11.89 | 7135.8  |
| 7.26  | 4354.8 | 13.26 | 7956.8  |
| 7.26  | 4356.6 | 16.93 | 10159.3 |

| No | Color | Structure | Visible |
|----|-------|-----------|---------|
| 1  |       |           | True    |

# **<sup>13</sup>C-NMR: some peaks not visible due to very strong line broadening**

## **4b = N-(1H-Benzoimidazol-2-ylmethyl)-acetamide**

|                        |                                                                                                                                         |                        |                      |
|------------------------|-----------------------------------------------------------------------------------------------------------------------------------------|------------------------|----------------------|
| Acquisition Time (sec) | 3.6351                                                                                                                                  |                        |                      |
| Comment                | ARC= 2009000164378 Labjournal 24041B027 Labgroup ID mohrp Contact Person Name Stefan Buerli Contact Person Address 092/4.36A Theme 4652 |                        |                      |
| Date                   | 16 Sep 2009 08:59:25                                                                                                                    | Date Stamp             | 16 Sep 2009 08:59:25 |
| File Name              | C:\DOCUMENTS AND SETTINGS\MOHRP\LOCAL SETTINGS\TEMPORARY INTERNET FILES\CONTENT\IE5\RUC7ZL0X\2009000164378_1002[1].JDX                  |                        |                      |
| Frequency (MHz)        | 150.92                                                                                                                                  | Nucleus                | <sup>13</sup> C      |
| Origin                 | NMR Roche Basel                                                                                                                         | Original Points Count  | 131072               |
| Points Count           | 131072                                                                                                                                  | Solvent                | DMSO-d6              |
| Sweep Width (Hz)       | 36057.42                                                                                                                                | Temperature (degree C) | 25.027               |
|                        |                                                                                                                                         | Number of Transients   | 256                  |
|                        |                                                                                                                                         | Owner                  | serv                 |
|                        |                                                                                                                                         | Spectrum Offset (Hz)   | 16515.3691           |

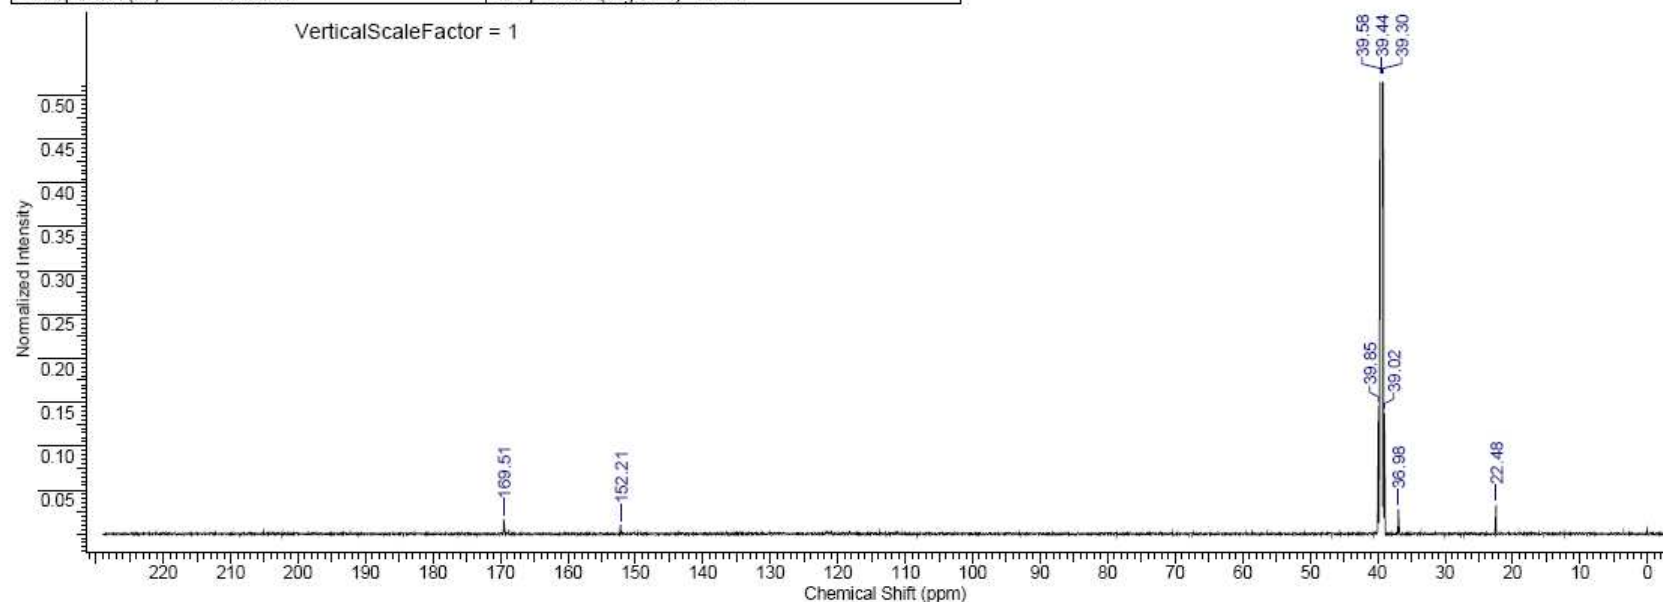

| (ppm) | (Hz)   | (ppm)  | (Hz)    | No | Color | Structure | Visible |
|-------|--------|--------|---------|----|-------|-----------|---------|
| 22.48 | 3392.2 | 39.58  | 5972.6  | 1  |       |           | True    |
| 36.98 | 5580.3 | 39.71  | 5993.5  |    |       |           |         |
| 39.02 | 5888.7 | 39.85  | 6014.5  |    |       |           |         |
| 39.16 | 5909.6 | 39.97  | 6032.6  |    |       |           |         |
| 39.30 | 5930.5 | 152.21 | 22970.7 |    |       |           |         |
| 39.44 | 5951.7 | 169.51 | 25581.9 |    |       |           |         |

## **S49-50: Methods for Measurement of Physicochemical Properties**

### **LIPOPHILICITY DETERMINATION (LOG D):**

Lipophilicity was determined by the new CAMDIS<sup>®</sup> method as described in US 2006211121 A1 and EP 1705474 A1. We found excellent quantitative agreement with the conventional shake-flask method (M.M. Abraham, H.S. Chadha, J.P.Dixon, and A.J. Leo, Hydrogen bonding, Part 9. The partition of solutes between water and various alcohols, Phys. Org. Chem. 7:712-716, 1994). However, for some of the more lipophilic molecules only the former procedure was applicable.

### **LYOPHILISATION SOLUBILITY ASSAY (LYSA):**

Samples were prepared in duplicate from 10 mM dimethylsulfoxide stock solutions. After evaporation (1h) of dimethylsulfoxide with a centrifugal vacuum evaporator (Genevac Technologies), the compounds were dissolved in 0.05 M phosphate buffer (pH 6.5), stirred for one hour and shaken two hours. After one night, the solutions were filtered using a microtiter filter plate (Millipore MSDV N65) and the filtrate and its 1/10 dilution were analyzed by direct UV measurement or by HPLC-UV. In addition a four point calibration curve is prepared from the 10 mM stock solutions and used for the solubility determination of the compounds. The results are expressed in µg/ml. Starting from a 10 mM stock solution, the measurement range for MW 500 was 0-666 µg/ml. In case the percentage of sample measured in solution after evaporation divided by the calculated maximum of sample amount was larger than 80% the solubility was reported as larger than this value.

## **PARALLEL ARTIFICIAL MEMBRANE PERMEABILITY ASSAY (PAMPA):**

PAMPA PSR4p is an automated assay which is based on 96 well microplates. The permeation of drugs is measured using a "sandwich" construction. A filterplate is coated with phospholipids (membrane) and placed into a donor plate containing a drug/buffer solution. Finally the filterplate is filled with buffer solution (acceptor). The donor concentration is measured at t-start (reference) and compared with the donor and acceptor concentration after a certain time t-end.

The following setup is used for the PAMPA PSR4p assay:

**Donor:** 0.05 M MOPSO buffer at pH 6.5 + 0.5% (w/v) Glyco Cholic Acid

**Membrane:** 10% (w/v) Egg Lecithin + 0.5% (w/v) Cholesterol in Dodecane

**Acceptor:** 0.05 M MOPSO buffer at pH 6.5.

The liquid handling is done with a TECAN TeMO pipetting robot. The drug analysis is based on UV spectroscopy. All samples are transferred into 96 well UV plates. A SpectraMax 190 UV plate reader is used to collect the UV spectras.



## S51-52: Summary of C=O...H-N interaction statistics (CSD)

| Topology               | CSD<br>% H-bond<br>(# entries) | # Prous<br>entries | CSD / PDB example |
|------------------------|--------------------------------|--------------------|-------------------|
| C=O...H-N (5-membered) |                                |                    |                   |
| aC3a                   | 40.4 (297)                     | 12                 | BEFSOU / 1jd2     |
| aNa                    | 9.1 (297)                      | 8                  | LAGFUV / 1afe     |
| aC4a                   | 8.8 (1476)                     | 420                | DEZTAD / 1gbm     |
| C=O...H-N (6-membered) |                                |                    |                   |
| cC3aC3a                | 93.0 (242)                     | 18                 | ACEMEB / 3ce3     |
| aC3cC3a                | 89.5 (447)                     | 49                 | ABEKIC / 2nq6     |
| cNaC3a                 | 96.0 (25)                      | 6                  | ADILOP / –        |
| aNaC3c                 | 93.5 (31)                      | 6                  | CIVRUV / 1bwb     |
| aNaC3a                 | 85.3 (312)                     | 18                 | ABEFAP / 2ati     |
| aC4aC3a                | 17.5 (103)                     | 7                  | COYMOS / 1jaq     |
| aC4aC4a                | 8.8 (331)                      | 82                 | BAWXED / 2huw     |
| C=O...H-N (7-membered) |                                |                    |                   |

|                        |           |    |               |
|------------------------|-----------|----|---------------|
| aC4aC3cC3a             | 61.1 (18) | 7  | MISBEW / 1pxx |
| aNaC3cC3a              | 36.6 (41) | 8  | BEDLUR / 1inf |
| aNaC4aC4a              | 17.8 (45) | 40 | XEMLIL / 4hvp |
| aNaC4aC3a              | 0.8 (799) | 91 | BXGLAL / 1eld |
| C=O...H-N (8-membered) |           |    |               |
| aNaC4aC4aC4a           | 28.6 (21) | 17 | WUGJIR / 1bzl |

### S53: Summary of C=O...H-O interaction statistics (CSD)

| Topology               | CSD<br>% H-bond<br>(# entries) | # Prous<br>entries | CSD / PDB example |
|------------------------|--------------------------------|--------------------|-------------------|
| C=O...H-O (5-membered) |                                |                    |                   |
| aC4a                   | 18.6 (732)                     | 108                | AFEZER / 13pk     |
| C=O...H-O (6-membered) |                                |                    |                   |
| aC3cC3a                | 84.7 (901)                     | 49                 | ABENAX / 1bx6     |
| aC4cC4a                | 25.5 (274)                     | 19                 | AVAZIG / 1kws     |
| cC4aC4a                | 16.5 (284)                     | 33                 | ALAROU / 1bck     |
| aC4aC4a                | 14.0 (607)                     | 42                 | AKUYAG / 1b52     |
| C=O...H-O (7-membered) |                                |                    |                   |
| aNaC4aC4a              | 6.0 (215)                      | 57                 | ARULOO / 1a7c     |

# S54: Summary of N...H-N and N...H-O interaction statistics (CSD)

| Topology             | CSD<br>% H-bond<br>(# entries) | # Prous<br>entries | CSD / PDB example |
|----------------------|--------------------------------|--------------------|-------------------|
| N...H-N (5-membered) |                                |                    |                   |
| aC3a                 | 60.5 (377)                     | 49                 | JAYBAN / 2h96     |
| aC4a                 | 17.4 (138)                     | 32                 | CIJGAE / 1o07     |
| N...H-N (6-membered) |                                |                    |                   |
| aNaC3a               | 80.9 (183)                     | 11                 | AWUBID / 1iky     |
| aC3aC3a              | 66.7 (27)                      | 36                 | BOJYII / 1pzp     |
| aC4aC4a              | 12.7 (63)                      | 29                 | GADBOC / 1ewj     |
| N...H-O (5-membered) |                                |                    |                   |
| aC4a                 | 15.7 (166)                     | 7                  | ABINOP / 1b66     |
| N...H-O (6-membered) |                                |                    |                   |
| aC4aC4a              | 27.6 (98)                      | 15                 | AFADEQ / 1dr1     |

### S55: Summary of Alkoxy...H-N interaction statistics (CSD)

Topology aC3aC3cC3a is predominantly represented by ester groups as H-bond acceptors. Due to the competition between C=O and alkoxy acceptors, which is strongly in favor of C=O (Fig. 7), the propensity for this topology is unusually low.

| Topology               | CSD<br>% H-bond<br>(# entries) | # Prous<br>entries | CSD / PDB example |
|------------------------|--------------------------------|--------------------|-------------------|
| C-O...H-N (5-membered) |                                |                    |                   |
| aC4aC3a                | 74.5 (51)                      | 8                  | AFEVOW / 1jcq     |
| aC3cC3a                | 71.2 (170)                     | 31                 | AFIJUV / 1y6a     |
| aC4aC4a                | 10.1 (79)                      | 47                 | FIHPAO / 1the     |
| C-O...H-N (6-membered) |                                |                    |                   |
| aC3cC3aC3a             | 87.9 (99)                      | 50                 | BEZJIA / 1t40     |
| aC3cC3aC3c             | 70.0 (20)                      | 7                  | AFOFAC / 2chm     |
| aC3aC3cC3a             | 6.0 (184)                      | 9                  | BUBNOB / –        |

## S56: Comparison between CSD and PDB statistics of C=O...H-N and C=O...H-O interactions

| Topology               | CSD<br>% H-bond<br>(# entries) | PDB<br>% H-bond<br>(# entries) | CSD / PDB example |
|------------------------|--------------------------------|--------------------------------|-------------------|
| C=O...H-N (6-membered) |                                |                                |                   |
| cC3aC3a                | 93.0 (242)                     | 66.7 (9)                       | ACEMEB / 3ce3     |
| aC3cC3a                | 89.5 (447)                     | 71.0 (31)                      | ABEKIC / 2nq6     |
| aNaC3a                 | 85.3 (312)                     | 57.1 (21)                      | ABEFAP / 2ati     |
| aC4aC4a                | 8.8 (331)                      | 9.2 (541)                      | BAWXED / 2huw     |
| C=O...H-N (7-membered) |                                |                                |                   |
| aNaC4aC3a              | 0.8 (799)                      | 4.4 (1111)                     | BXGLAL / 1eld     |
| C=O...H-O (6-membered) |                                |                                |                   |
| aC3cC3a                | 84.7 (901)                     | 47.7 (86)                      | ABENAX / 1bx6     |
| aC4aC4a                | 14.0 (607)                     | 9.0 (578)                      | AKUYAG / 1b52     |
| C=O...H-O (7-membered) |                                |                                |                   |
| aNaC4aC4a              | 6.0 (215)                      | 2.6 (773)                      | ARULOO / 1a7c     |

**S57: Crystal structure examples of N...H-N and Alkoxy...H-N interactions in 5-membered rings with particular high propensities**

a) N...NH interaction with topology aC3a, 61% hbond (jnk1 complex 2h96), b) alkoxy...NH interaction with topology aC4aC3a, 75% hbond (farnesyltransferase complex 1jcq), c) alkoxy...NH interaction with topology aC3cC3a, 71% hbond (kdr complex 1y6a).

**a)**

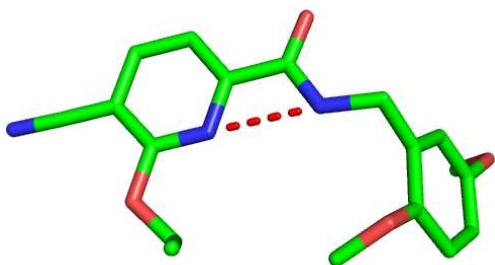

**b)**

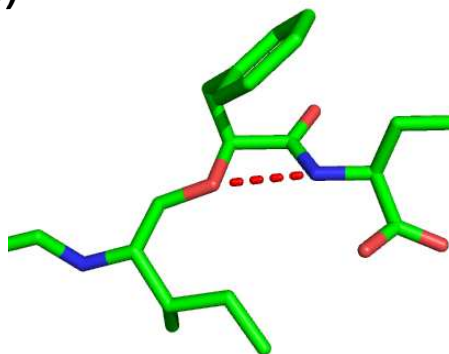

**c)**

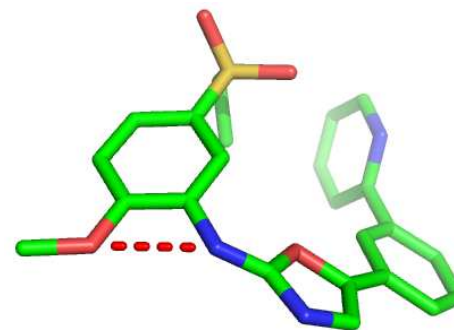

Supplement: Supplementary file 1 [file 4476172]
